# Supplementary material
Source: MDPI journal article supplement (https://www.mdpi.com/1424-8247/15/4/468)
Supplement: s1 [file s1]

---

## Supplementary Materials

### Synthesis and antiproliferative activity of novel imipridone-ferrocene hybrids with triazole and alkyne linkers

Tamás Czuczi <sup>1</sup>, József Murányi <sup>2</sup>, Péter Bárány <sup>1</sup> István Móra <sup>2</sup>, Adina Borbély <sup>3</sup>, Miklós Csala <sup>2,4</sup> and Antal Csámpai <sup>1,\*</sup>

<sup>1</sup> Department of Organic Chemistry, Eötvös Loránd University (ELTE) Budapest Pázmány P. sétány 1/A, H-1117, Hungary; [czuczi.tamas@gmail.com](mailto:czuczi.tamas@gmail.com); (T.C.), [peterbarany@caesar.elte.hu](mailto:peterbarany@caesar.elte.hu); (P.B.), [csampai@caesar.elte.hu](mailto:csampai@caesar.elte.hu) (A.Cs.)

<sup>2</sup> MTA-SE Pathobiochemistry Research Group, Tűzoltó u. 37-47, H1094 Budapest, Hungary; ([jozsefmuranyi84@gmail.com](mailto:jozsefmuranyi84@gmail.com). (J.M.) [istvan.mora1313@gmail.com](mailto:istvan.mora1313@gmail.com). (I.M.) and [csala.miklos@med.semmelweis-univ.hu](mailto:csala.miklos@med.semmelweis-univ.hu); (M.Cs.)

<sup>3</sup> MTA-ELTE Lendület Ion Mobility Mass Spectrometry Research Group and Department of Analytical Chemistry, Eötvös Loránd University (ELTE) Budapest Pázmány P. sétány 1/A, H-1117, Hungary; [adina.borbely@ttk.elte.hu](mailto:adina.borbely@ttk.elte.hu); (A.B.)

<sup>4</sup> Department of Molecular Biology, Semmelweis University H1094 Budapest, Hungary (M.Cs.)

\* Correspondence: [csampai@caesar.elte.hu](mailto:csampai@caesar.elte.hu); Tel.: (+36 1 372 2500/6591)

#### Content:

S.1. HPLC chromatograms of selected compounds pp. 2 – 6

S.2. <sup>1</sup>H-, <sup>13</sup>C NMR and HRMS data of the targeted compounds pp. 7 – 14

S.3. Copies of the <sup>1</sup>H- and <sup>13</sup>C-NMR spectra pp. 15 – 36

S.4. Copies of the HRMS spectra pp. 37 – 48

S.5. Data of MTT Cell Viability Assay pp. 49 – 51

S.6. Data of CellTiter-Glo Cell Viability Assay p. 52

## S.1. HPLC chromatogram of selected compounds

ONC201

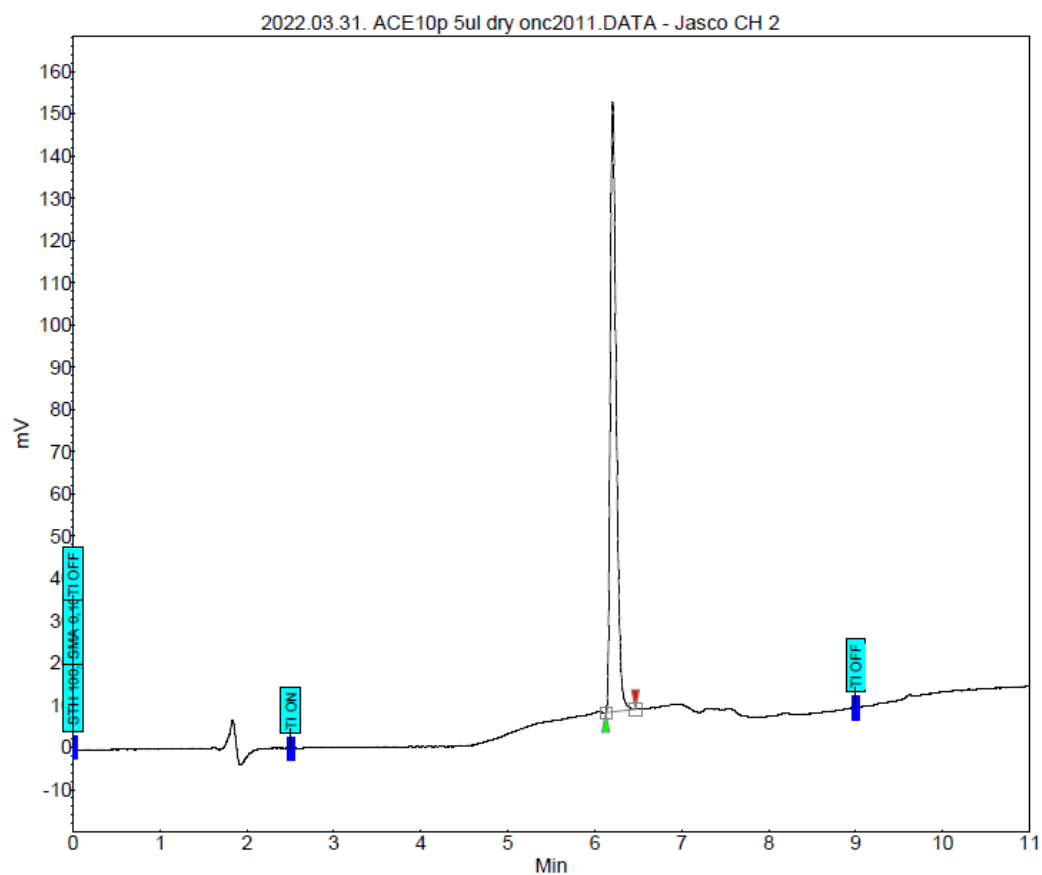

| Index | Name    | Time<br>[Min] | Quantity<br>[% Area] | Height<br>[mV] | Area<br>[mV.Min] | Area %<br>[%] |
|-------|---------|---------------|----------------------|----------------|------------------|---------------|
| 1     | UNKNOWN | 6.207         | 100.00               | 144.3          | 11.541           | 100.000       |
| Total |         |               | 100.00               | 144.3          | 11.541           | 100.000       |

10a

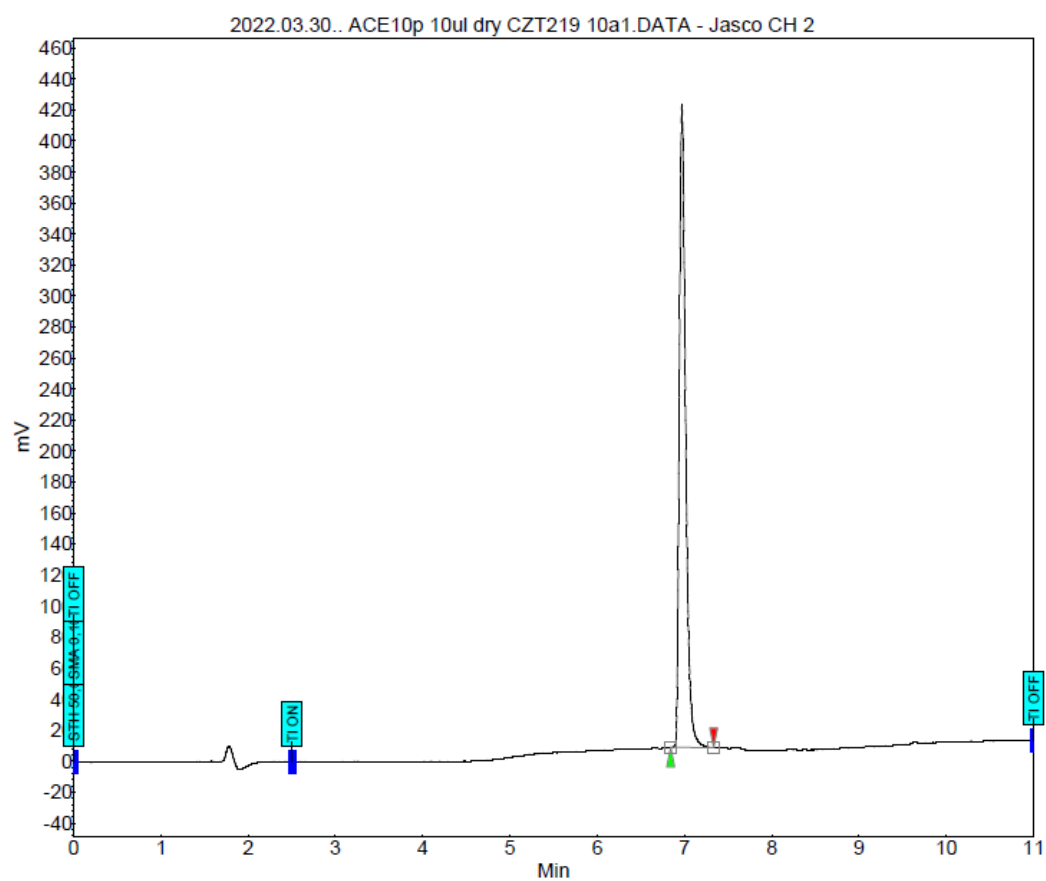

| Index | Name    | Time<br>[Min] | Quantity<br>[% Area] | Height<br>[mV] | Area<br>[mV.Min] | Area %<br>[%] |
|-------|---------|---------------|----------------------|----------------|------------------|---------------|
| 1     | UNKNOWN | 6.970         | 100.00               | 414.6          | 34.845           | 100.000       |
| Total |         |               | 100.00               | 414.6          | 34.845           | 100.000       |

17b

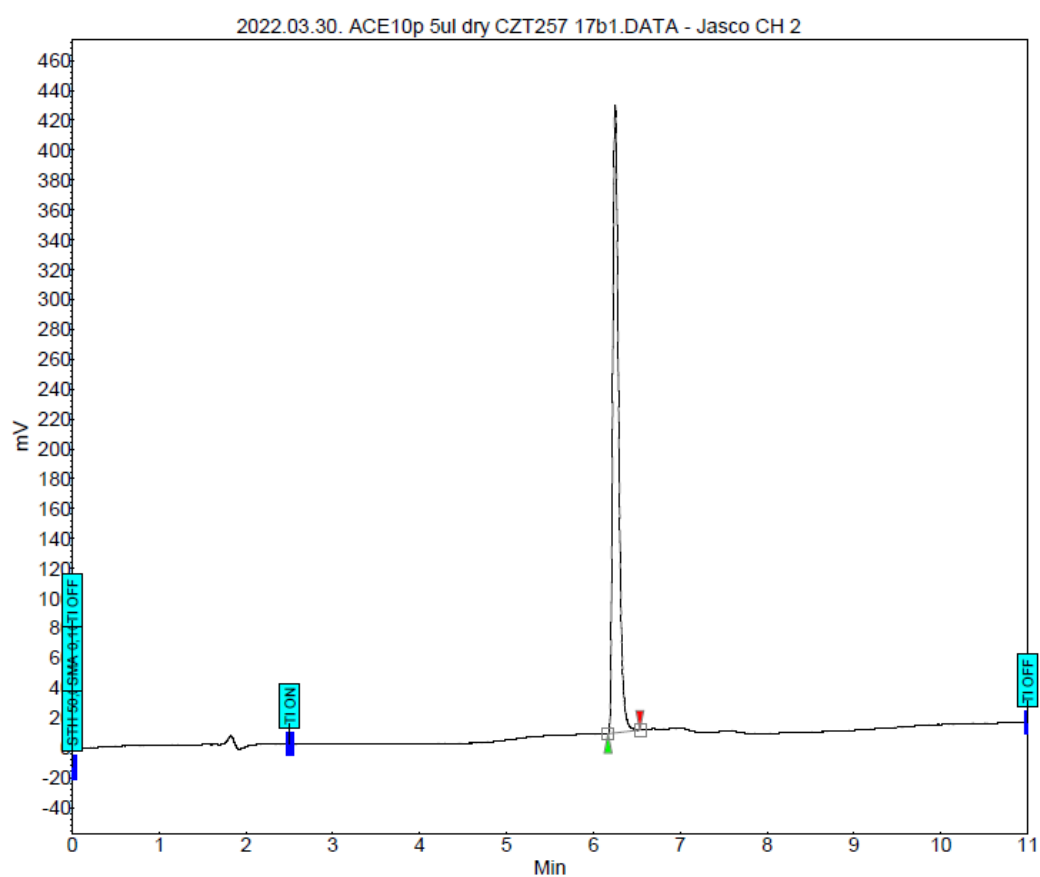

| Index | Name    | Time<br>[Min] | Quantity<br>[% Area] | Height<br>[mV] | Area<br>[mV.Min] | Area %<br>[%] |
|-------|---------|---------------|----------------------|----------------|------------------|---------------|
| 1     | UNKNOWN | 6.252         | 100.00               | 420.0          | 32.562           | 100.000       |
| Total |         |               | 100.00               | 420.0          | 32.562           | 100.000       |

17c

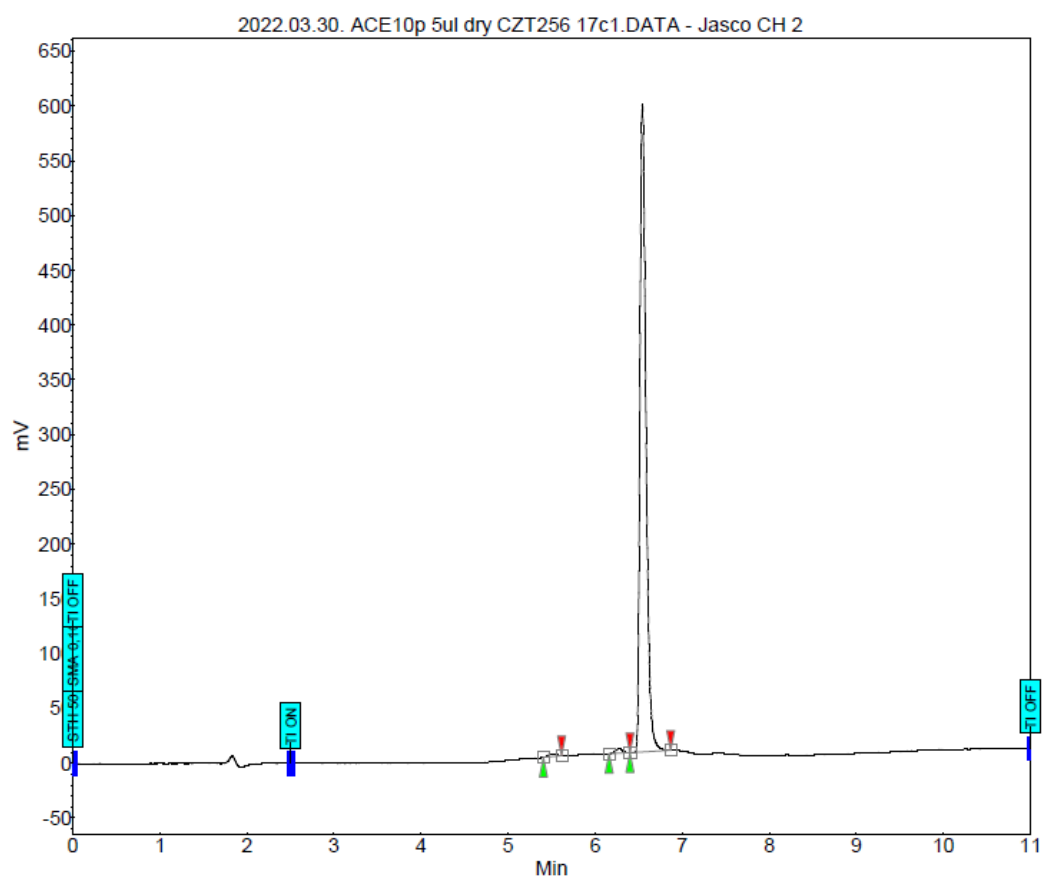

| Index | Name    | Time<br>[Min] | Quantity<br>[% Area] | Height<br>[mV] | Area<br>[mV.Min] | Area %<br>[%] |
|-------|---------|---------------|----------------------|----------------|------------------|---------------|
| 1     | UNKNOWN | 5.500         | 0.50                 | 2.4            | 0.242            | 0.504         |
| 2     | UNKNOWN | 6.272         | 0.75                 | 4.1            | 0.359            | 0.749         |
| 3     | UNKNOWN | 6.542         | 98.75                | 591.3          | 47.277           | 98.746        |
| Total |         |               | 100.00               | 597.8          | 47.877           | 100.000       |

17d

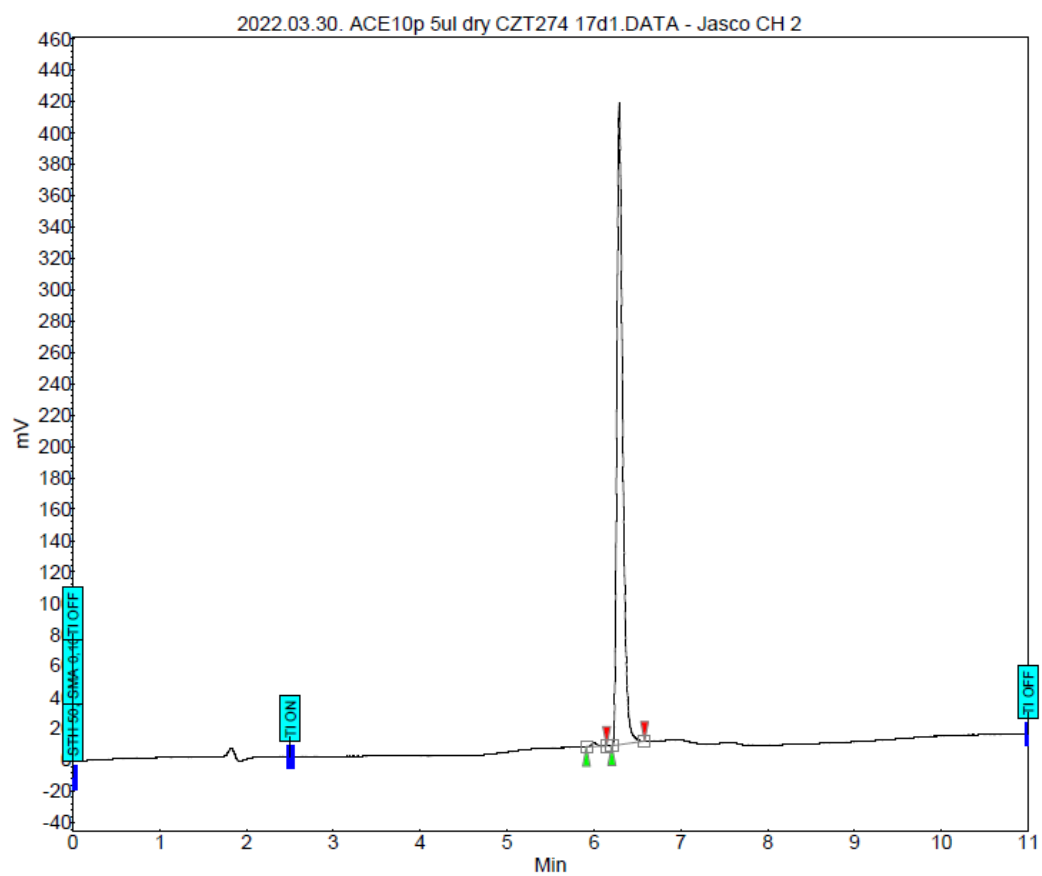

| Index | Name    | Time<br>[Min] | Quantity<br>[% Area] | Height<br>[mV] | Area<br>[mV.Min] | Area %<br>[%] |
|-------|---------|---------------|----------------------|----------------|------------------|---------------|
| 1     | UNKNOWN | 6.002         | 0.48                 | 2.1            | 0.155            | 0.483         |
| 2     | UNKNOWN | 6.292         | 99.52                | 409.3          | 32.006           | 99.517        |
| Total |         |               | 100.00               | 411.4          | 32.161           | 100.000       |

## S.2. <sup>1</sup>H-, <sup>13</sup>C NMR and HRMS data of the targeted compounds

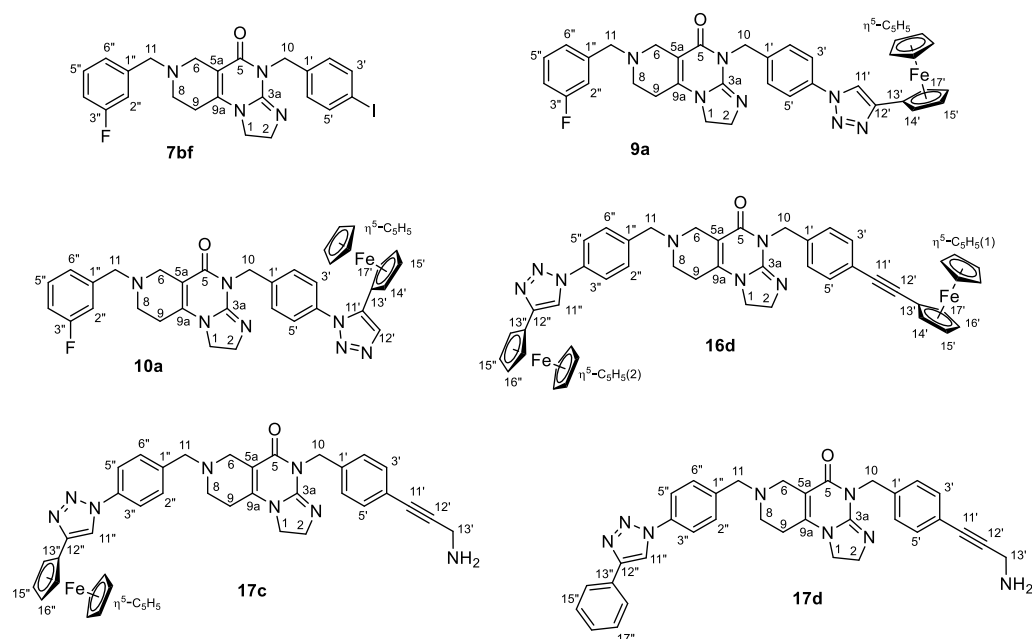

**Figure S.5.** Numbering of atoms presented on the structures of representative compounds is used for the assignment of <sup>1</sup>H- and <sup>13</sup>C-NMR data.

### 7-(3-fluorobenzyl)-4-(4-iodobenzyl)-2,4,6,7,8,9-hexahydroimidazo[1,2-a]pyrido[3,4-e]pyrimidin-5(1H)-one (7bf):

<sup>1</sup>H-NMR (CDCl<sub>3</sub>): 7.58 (d, *J*=8.4 Hz, 2H, H-3',5'); 7.25 (m, 1H, H-5''); 7.20 (d, *J*=8.4 Hz, 2H, H-2',6'); 7.07 (d, *J*=8.3 Hz, 1H, H-2''); 7.05 (dt, *J*=9.6 Hz and 2.0 Hz, 1H, H-6''); 6.94 (tdd, *J*=8.5 Hz, 2.6 Hz and 0.8 Hz, 1H, H-4''); 4.96 (s, 2H, H-10); 3.88 (s, 4H, H-1,2); 3.63 (s, 2H, H-11); 3.26 (br s, 2H, H-6); 2.64, (t, *J*=5.7 Hz, 2H, H-8); 2.46 (t, 2H, *J*=5.7 Hz, H-9). <sup>13</sup>C-NMR (CDCl<sub>3</sub>): 163.0 (d, *J*=246.0 Hz, C-3''); 161.5 (C-5); 152.9 (C-3a); 145.2 (C-9a); 140.6 (d, *J*=7.2 Hz, C-1''); 137.3 (C-3',5'); 136.6 (C-1'); 130.8 (C-2',6'); 129.8 (d, *J*=8.6 Hz, C-3''); 124.5 (d, *J*=8.3 Hz, C-6''); 115.6 (d, *J*=21.6 Hz, C-2''); 101.8 (C-5a); 93.0 (C-4'); 61.8 (C-11); 50.6 (C-2); 49.4 (C-6); 48.3 (C-8); 46.9 (C-1); 44.9 (C-10); 26.8 (C-9). HRMS: *m/z* calc. for [C<sub>23</sub>H<sub>23</sub>FIN<sub>4</sub>O]<sup>+</sup>: 517.0895 [M+H]<sup>+</sup>; found: 517.0885; mass error: 1.96 ppm.

### 7-(3,5-difluorobenzyl)-4-(4-iodobenzyl)-2,4,6,7,8,9-hexahydroimidazo[1,2-a]pyrido[3,4-e]pyrimidin-5(1H)-one (7cf):

<sup>1</sup>H-NMR (CDCl<sub>3</sub>): 7.59 (d, *J*=8.4 Hz, 2H, H-3',5'); 7.20 (d, *J*=8.4 Hz, 2H, H-2',6'); 6.86 (m, 2H, H-2'',6''); 6.69 (tt, *J*=8.8 Hz and 2.2 Hz, 1H, H-4''); 4.97 (s, 2H, H-10); 3.89 (s, 4H, H-1,2); 3.61 (s, 2H, H-11); 3.24 (br s, 2H, H-6); 2.65, (t, *J*=5.7 Hz, 2H, H-8); 2.47 (t, 2H, *J*=5.7 Hz, H-9). <sup>13</sup>C-NMR (CDCl<sub>3</sub>): 163.1 (dd, *J*=248.0 Hz and 12.9 Hz, C-3'',5''); 161.3 (C-5); 152.9 (C-3a); 145.6 (C-9a); 142.2 (t, *J*=9.4 Hz, C-1''); 137.4 (C-3',5'); 136.6 (C-1'); 130.8 (C-2',6'); 111.3 (dd, *J*=19.5 Hz and 4.4 Hz, C-2'',6''); 102.7 (t, *J*=26.0 Hz, C-4''); 101.6 (C-5a); 93.1 (C-4'); 61.4 (C-11); 50.7 (C-2); 49.4 (C-6); 48.4 (C-8); 46.9 (C-1); 44.9 (C-10); 26.8 (C-9). HRMS: *m/z* calc. for [C<sub>23</sub>H<sub>22</sub>F<sub>2</sub>IN<sub>4</sub>O]<sup>+</sup>: 535.0801. [M+H]<sup>+</sup>; found: 535.0790; mass error: 2.04 ppm.

**7-(3-cyanobenzyl)-4-(4-iodobenzyl)-2,4,6,7,8,9-hexahydroimidazo[1,2-*a*]pyrido[3,4-*e*]pyrimidin-5(1*H*)-one (7df):**

<sup>1</sup>H-NMR (CDCl<sub>3</sub>): 7.64 (br *s*, *J* ~ 2 Hz, 1H, H-2''); 7.58 (d, *J* = 8.4 Hz, 2H, H-3',5'); 7.52-7.57 (overlapping m's, 2H, H-4'' and H-6''); 7.41 (t, *J* = 7.8 Hz, 1H, H-5''); 7.19 (d, *J* = 8.4 Hz, 2H, H-2',6'); 4.96 (s, 2H, H-10); 3.89 (s, 4H, H-1,2); 3.66 (s, 2H, H-11); 3.23 (br s, 2H, H-6); 2.66 (t, *J* = 5.6 Hz, 2H, H-8); 2.47 (t, 2H, *J* = 5.6 Hz, H-9). <sup>13</sup>C-NMR (CDCl<sub>3</sub>): 161.3 (C-5); 152.9 (C-3a); 145.6 (C-9a); 139.7 (C-1''); 137.4 (C-3',5'); 136.6 (C-1'); 133.2 (C-2''); 132.3 (C-6''); 131.1 (C-4''); 130.8 (C-2',6'); 129.3 (C-5''); 118.9 (CN); 112.6 (C-3''); 101.6 (C-5a); 93.1 (C-4'); 61.4 (C-11); 50.6 (C-2); 49.3 (C-6); 48.6 (C-8); 46.9 (C-1); 45.1 (C-10); 26.8 (C-9). HRMS: *m/z* calc. for [C<sub>24</sub>H<sub>23</sub>IN<sub>5</sub>O]<sup>+</sup>: 524.0942 [M+H]<sup>+</sup>; found: 524.0934; mass error: 1.50 ppm.

**4-(4-Azidobenzyl)-7-(3-fluorobenzyl)-2,4,6,7,8,9-hexahydroimidazo[1,2-*a*]pyrido[3,4-*e*]pyrimidin-5(1*H*)-one (7bh):**

<sup>1</sup>H-NMR (CDCl<sub>3</sub>): 7.47 (d, *J* = 8.4 Hz, 2H, H-2',6'); 7.27 (m, 1H, H-5''); 7.08 (br d, *J* = 8.4 Hz, 1H, H-6''); 7.07 (dt, *J* = 9.6 Hz and 2.0 Hz, 1H, H-2''); 6.95 (m, 1H, H-4''); 6.93 (d, *J* = 8.3 Hz, 2H, H-3',5'); 5.00 (s, 2H, H-10); 3.91-3.84 (m, 4H, H-1 and H-2); 3.64 (s, 2H, H-11); 3.27 (br s, 2H, H-6); 2.65 (t, *J* = 5.7 Hz, 2H, H-8); 2.47 (t, *J* = 5.7 Hz, 2H, H-9). <sup>13</sup>C-NMR (CDCl<sub>3</sub>): 163.0 (d, *J* = 246.2 Hz, C-3''); 161.4 (C-5); 153.1 (C-3a); 145.6 (C-9a); 140.6 (d, *J* = 7.0 Hz, C-1''); 139.1 (C-4'); 133.8 (C-1'); 130.6 (C-2',6'); 129.8 (d, *J* = 8.8 Hz, C-5''); 124.5 (C-6''); 118.9 (C-3',5'); 115.6 (d, *J* = 21.5 Hz, C-6''); 114.3 (d, *J* = 21.0 Hz, C-4''); 101.8 (C-5a); 61.8 (C-11); 50.6 (C-2); 49.4 (C-6); 48.4 (C-8); 46.9 (C-1); 44.9 (C-10); 27.0 (C-9). HRMS: *m/z* calc. for [C<sub>23</sub>H<sub>22</sub>FN<sub>7</sub>O]<sup>+</sup>: 432.1943 [M+H]<sup>+</sup>; found: 432.1936; mass error: 1.53 ppm.

**4-(4-Azidobenzyl)-7-(3,5-difluorobenzyl)-2,4,6,7,8,9-hexahydroimidazo[1,2-*a*]pyrido[3,4-*e*]pyrimidin-5(1*H*)-one (7ch):**

<sup>1</sup>H-NMR (CDCl<sub>3</sub>): 7.44 (d, *J* = 8.3 Hz, 2H, H-2',6'); 6.90 (d, *J* = 8.3 Hz, 2H, H-3',5'); 6.84 (br *s*, *J* ~ 7 Hz and ~ 2 Hz, 2H, H-2'',6''); 6.66 (tt, *J* = 9.0 Hz and 2.3 Hz, 1H, H-4''); 4.97 (s, 2H, H-10); 3.91-3.84 (m, 4H, H-1 and H-2); 3.59 (s, 2H, H-11); 3.23 (br s, 2H, H-6); 2.63 (t, *J* = 5.7 Hz, 2H, H-8); 2.44 (t, *J* = 5.7 Hz, 2H, H-9). <sup>13</sup>C-NMR (CDCl<sub>3</sub>): 163.1 (dd, *J* = 250.2 Hz and 15.6 Hz, C-3'',5''); 161.4 (C-5); 152.9 (C-3a); 145.5 (C-9a); 142.2 (t, *J* = 8.4 Hz, C-1''); 139.1 (C-4'); 133.8 (C-1'); 130.4 (C-2',6'); 118.9 (C-3',5'); 111.3 (dd, *J* = 19.3 Hz and 4.9 Hz, C-2'',6''); 102.7 (t, *J* = 25.7 Hz, C-4''); 101.7 (C-5a); 61.4 (C-11); 50.6 (C-2); 49.4 (C-6); 48.4 (C-8); 46.9 (C-1); 44.8 (C-10); 26.8 (C-9). HRMS: *m/z* calc. for [C<sub>23</sub>H<sub>22</sub>F<sub>2</sub>N<sub>7</sub>O]<sup>+</sup>: 450.1848 [M+H]<sup>+</sup>; found: 450.1843; mass error: 1.20 ppm.

**7-(4-Azidobenzyl)-4-(4-iodobenzyl)-2,4,6,7,8,9-hexahydroimidazo[1,2-*a*]pyrido[3,4-*e*]pyrimidin-5(1*H*)-one (7hf):**

<sup>1</sup>H-NMR (CDCl<sub>3</sub>): 7.59 (d, *J* = 8.2 Hz, 2H, H-3',5'); 7.30 (d, *J* = 8.3 Hz, 2H, H-2'',6''); 7.20 (d, *J* = 8.3 Hz, 2H, H-2',6'); 6.97 (d, *J* = 8.3 Hz, 2H, H-3'',5''); 4.97 (s, 2H, H-10); 3.88 (s, 4H, H-1 and H-2); 3.62 (s, 2H, H-11); 3.24 (br s, 2H, H-6); 2.64 (t, *J* = 5.6 Hz, 2H, H-8); 2.45 (t, *J* = 5.6 Hz, 2H, H-9). <sup>13</sup>C-NMR (CDCl<sub>3</sub>): 161.3 (C-5); 152.9 (C-3a); 145.7 (C-9a); 139.1 (C-4'); 137.3 (C-3',5'); 136.6 (C-1'); 134.5 (C-1''); 130.8 (C-2',6'); 130.5 (C-2'',6''), 119.1 (C-3'',5''); 101.8 (C-5a); 93.0 (C-4'); 61.6 (C-



11); 50.6 (C-2); 49.3 (C-6); 48.3 (C-8); 46.9 (C-1); 44.9 (C-10); 26.8 (C-9). HRMS:  $m/z$  calc. for  $[C_{23}H_{23}IN_7O]^+$ : 540.1003  $[M+H]^+$ ; found: 540.0994; mass error: 1.73 ppm.

**7-(4-Azidobenzyl)-4-(2-methylbenzyl)-2,4,6,7,8,9-hexahydroimidazo[1,2-*a*]pyrido[3,4-*e*]pyrimidin-5(1*H*)-one (7hg):**

$^1H$ -NMR ( $CDCl_3$ ): 7.31 (d,  $J=8.3$  Hz, 2H, H-2'',6''); 7.11-7.06 (overlapping m's, 3H, H-3',4',5'); 7.03 (m, 1H, H-6'); 6.96 (d,  $J=8.3$ , 2H, H-3'',5''); 5.03 (s, 2H, H-10); 3.91 (~t,  $J\sim 10$  Hz, 2H, H-2); 3.86 (~t,  $J\sim 10$  Hz, 2H, H-1); 3.62 (s, 2H, H-11); 3.27 (br s, 2H, H-6); 2.66 (t,  $J=5.6$  Hz, 2H, H-8); 2.50 (t,  $J=5.6$  Hz, 2H, H-9); 2.38 (s, 3H,  $\underline{CH_3}$ ).  $^{13}C$ -NMR ( $CDCl_3$ ): 161.5 (C-5); 153.2 (C-3a); 145.7 (C-9a); 139.1 (C-4'); 135.6 (C-1'); 134.6 (C-1''); 134.2 (C-2'); 130.5 (C-2'',6''), 130.2 (C-5'); 126.8 (C-4'); 125.9 (C-3'); 125.2 (C-6'); 119.0 (C-3'',5''); 101.8 (C-5a); 61.6 (C-11); 50.6 (C-2); 49.4 (C-6); 48.3 (C-8); 46.9 (C-1); 43.2 (C-10); 26.8 (C-9); 19.2 ( $\underline{CH_3}$ ). HRMS:  $m/z$  calc. for  $[C_{24}H_{26}N_7O]^+$ : 428.2193  $[M+H]^+$ ; found: 428.2185; mass error: 1.95 ppm.

**7-(3-Fluorobenzyl)-4-(4-(4-ferrocenyl-1*H*-1,2,3-triazol-1-yl)benzyl)-2,4,6,7,8,9-hexahydroimidazo[1,2-*a*]pyrido[3,4-*e*]pyrimidin-5(1*H*)-one (9a):**

$^1H$ -NMR ( $CDCl_3$ ): 7.84 (s, 1H, H-11'); 7.68, (d,  $J=8.4$  Hz, 2H, H-3',5'); 7.63, (d,  $J=8.4$  Hz, 2H, H-2',6'); 7.26 (m, 1H, H-5''); 7.09 (d,  $J=8.3$  Hz, 1H, H-6''); 7.06 (dt,  $J=9.5$  Hz and 2.0 Hz, 1H, H-2''); 6.95 (td,  $J=8.6$  Hz and 2.4 Hz, 1H, H-4''); 5.10 (s, 2H, H-10); 4.77 (br ~s, 2H, H-14',17'); 4.32 (br ~s, 2H, H-15',16'); 4.10 (s, 5H,  $\eta^5-C_5H_5$ ); 3.91 (s, 4H, H-1,2); 3.65 (s, 2H, H-11); 3.29 (br ~s, 2H, H-6); 2.67 (t,  $J=5.6$  Hz, 2H, H-8); 2.48 (t,  $J=5.7$  Hz, 2H, H-9).  $^{13}C$ -NMR ( $CDCl_3$ ): 163.0 (d,  $J=246.0$  Hz C-3''); 161.4 (C-6); 152.9 (C-3a); 147.5 (C-12'); 145.8 (C-9a); 140.5 (d,  $J=7.1$  Hz, C-1''); 137.6 (C-4'); 136.2 (C-1'); 130.1 (C-2',6'); 129.8 (d,  $J=8.5$  Hz, C-5''); 124.5 (C-6''); 120.1 (C-3',5'); 116.5 (C-11'); 115.6 (d,  $J=21.6$  Hz, C-2''); 114.3 (d,  $J=21.2$  Hz, C-4''); 101.8 (C-5a); 75.0 (C-13'); 69.6 ( $\eta^5-C_5H_5$ ); 68.8 (15',16'); 66.8 (C-14',17'); 61.7 (C-11); 50.6 (C-2); 49.4 (C-6); 48.3 (C-8); 46.9 (C-1); 44.8 (C-10); 26.8 (C-9). HRMS:  $m/z$  calc. for  $[C_{35}H_{32}FFeN_7O]^+$ : 641.1996  $[M - e]^+$ ; found: 641.1984; mass error: 1.87 ppm

**4-(4-Iodobenzyl)-7-(4-(4-ferrocenyl-1*H*-1,2,3-triazol-1-yl)benzyl)-2,4,6,7,8,9-hexahydroimidazo[1,2-*a*]pyrido[3,4-*e*]pyrimidin-5(1*H*)-one (12a):**

$^1H$ -NMR ( $CDCl_3$ ): 7.87 (s, 1H, H-11''); 7.71 (d,  $J=8.4$  Hz, 2H, H-3'',5''); 7.60 (d,  $J=8.1$  Hz, 2H, H-3',5'); 7.50 (d,  $J=8.4$  Hz, 2H, H-2'',6''); 7.21 (d,  $J=8.1$  Hz, 2H, H-2',6'); 4.98 (s, 2H, H-10); 4.79 (t,  $J=1.7$  Hz, 2H, H-14'',17''); 4.33 (t,  $J=1.7$  Hz, 2H, H-15'',16''); 4.12 (s, 5H,  $\eta^5-C_5H_5$ ); 3.90 (br ~s, 4H, H-1,2); 3.72 (s, 2H, H-11); 3.29 (br ~s, 2H, H-6); 2.69 (t,  $J=5.7$  Hz, 2H, H-8); 2.48 (t,  $J=5.7$  Hz, 2H, H-9).  $^{13}C$ -NMR ( $CDCl_3$ ): 161.3 (C-6); 152.9 (C-3a); 147.6 (C-12''); 145.6 (C-9a); 138.6 (C-1''); 137.4 (C-3',5'); 136.6 (C-1'); 136.3 (C-4''); 130.8 (C-2',6'); 130.2 (C-2'',6''); 120.4 (C-3'',5''); 116.6 (C-11''); 101.7 (C-5a); 93.0 (C-4'); 75.0 (C-13''); 69.6 ( $\eta^5-C_5H_5$ ); 68.8 (C-15'',16''); 66.8 (C-14'',17''); 61.6 (C-11); 50.8 (C-2); 49.4 (C-6); 48.4 (C-8); 46.9 (C-1); 44.9 (C-10); 26.8 (C-9). HRMS:  $m/z$  calc. for  $[C_{35}H_{33}FeIN_7O]^+$ : 750.1135  $[M+H]^+$ ; found: 750.1112; mass error: 3.09 ppm

**4-(2-Methylbenzyl)-7-(4-(4-ferrocenyl-1*H*-1,2,3-triazol-1-yl)benzyl)-2,4,6,7,8,9-hexahydroimidazo[1,2-*a*]pyrido[3,4-*e*]pyrimidin-5(1*H*)-one (12b):**

<sup>1</sup>H-NMR (CDCl<sub>3</sub>): 7.88 (s, 1H, H-11''); 7.72 (d, *J*=8.4 Hz, 2H, H-3'',5''); 7.49 (d, *J*=8.4 Hz, 2H, H-2'',6''); 7.13 (overlapping m's, 3H, H-3',4',5'); 7.04 (m, 1H, H-6'); 5.04 (s, 2H, H-10); 4.78 (t, *J*=1.7 Hz, 2H, H-14'',17''); 4.33 (t, *J*=1.7 Hz, 2H, H-15'',16''); 4.10 (s, 5H, η<sup>5</sup>-C<sub>5</sub>H<sub>5</sub>); 3.92 (~t, *J*~10 Hz, 2H, H-1); 3.88 (~t, *J*~10 Hz, 2H, H-2); 3.72 (s, 2H, H-11); 3.31 (br ~s, 2H, H-6); 2.71 (t, *J*=5.6 Hz, 2H, H-8); 2.52 (t, *J*=5.6 Hz, 2H, H-9); 2.39 (s, 3H, CH<sub>3</sub>). <sup>13</sup>C-NMR (CDCl<sub>3</sub>): 161.5 (C-6); 153.3 (C-3a); 147.7 (C-12''); 145.6 (C-9a); 138.6 (C-1''); 136.2 (C-4''); 135.6 (C-2'); 134.3 (C-1'); 130.3 (C-2'',6''); 130.2 (C-3'); 126.8 (C-5'); 125.9 (C-4'); 125.2 (C-6'); 120.4 (C-3'',5''); 116.6 (C-11''); 101.7 (C-5a); 74.9 (C-13''); 69.6 (η<sup>5</sup>-C<sub>5</sub>H<sub>5</sub>); 68.8 (C-15'',16''); 66.8 (C-14'',17''); 61.6 (C-11); 50.6 (C-2); 49.5 (C-6); 48.4 (C-8); 47.0 (C-1); 43.2 (C-10); 26.8 (C-9); 19.3 (CH<sub>3</sub>). HRMS: *m/z* calc. for [C<sub>36</sub>H<sub>36</sub>FeN<sub>7</sub>O]<sup>+</sup>: 638.2325 [M+H]<sup>+</sup>; found: 638.2305; mass error: 3.17 ppm.

**4-(4-Iodobenzyl)-7-(4-(4-phenyl-1*H*-1,2,3-triazol-1-yl)benzyl)-2,4,6,7,8,9-hexahydroimidazo[1,2-*a*]pyrido[3,4-*e*]pyrimidin-5(1*H*)-one (13):**

<sup>1</sup>H-NMR (CDCl<sub>3</sub>): 8.18 (s, 1H, H-11''); 7.92 (dd, *J*=7.8 Hz and 2.1 Hz, 2H, H-14'',18''); 7.74 (d, *J*=8.4 Hz, 2H, H-3'',5''); 7.60 (d, *J*=8.3 Hz, 2H, H-3',5'); 7.51 (d, *J*=8.4 Hz, 2H, H-2'',6''); 7.47 (t, *J*=7.8 Hz, 2H, H-15'',17''); 7.37 (tt, *J*=7.8 Hz and 2.1 Hz, 1H, H-16''); 7.21 (d, *J*=8.3 Hz, 2H, H-2',6'); 4.98 (s, 2H, H-10); 3.90 (br ~s, 4H, H-1,2); 3.72 (s, 2H, H-11); 3.30 (br ~s, 2H, H-6); 2.70 (t, *J*=5.6 Hz, 2H, H-8); 2.49 (t, *J*=5.6 Hz, 2H, H-9). <sup>13</sup>C-NMR (CDCl<sub>3</sub>): 161.4 (C-6); 153.0 (C-3a); 148.6 (C-12''); 145.8 (C-9a); 139.0 (two coalesced lines, C-1'' and C-13''); 137.3 (C-3',5'); 136.8 (C-1'); 136.4 (C-4''); 130.8 (C-2',6'); 130.4 (C-2'',6''); 128.8 (C-15'',17''); 128.3 (C-16''); 125.7 (C-14'',18''); 120.7 (C-3'',5''); 117.4 (C-11''); 101.7 (C-5a); 93.1 (C-4'); 61.7 (C-11); 50.5 (C-2); 49.5 (C-6); 48.4 (C-8); 47.0 (C-1); 45.0 (C-10); 27.1 (C-9). HRMS: *m/z* calc. for [C<sub>31</sub>H<sub>29</sub>IN<sub>7</sub>O]<sup>+</sup>: 642.1473 [M+H]<sup>+</sup>; found: 642.1455; mass error: 2.78 ppm

**7-(3-Fluorobenzyl)-4-(4-(5-ferrocenyl-1*H*-1,2,3-triazol-1-yl)benzyl)-2,4,6,7,8,9-hexahydroimidazo[1,2-*a*]pyrido[3,4-*e*]pyrimidin-5(1*H*)-one (10a):**

<sup>1</sup>H-NMR (CDCl<sub>3</sub>): 7.79 (s, 1H, H-12'); 7.57 (d, *J*=8.2 Hz, 2H, H-2',6'); 7.33 (d, *J*=8.2 Hz, 2H, H-3',5'); 7.27 (m, 1H, H-5''); 7.09 (d, *J*=8.4 Hz, 1H, H-6''); 7.06 (dt, *J*=9.4 Hz and 2.2 Hz, 1H, H-2''); 6.95 (dt, *J*=8.6 Hz and 2.2 Hz, 1H, H-4''); 5.12 (s, 2H, H-10); 4.24 (br ~s, 2H, H-14',17'); 4.20 (br ~s, 2H, H-15',16'); 4.05 (s, 5H, η<sup>5</sup>-C<sub>5</sub>H<sub>5</sub>); 3.90 (br ~s, 4H, H-1,2); 3.65 (s, 2H, H-11); 3.30 (br ~s, 2H, H-6); 2.67 (t, *J*=5.7 Hz, 2H, H-8); 2.49 (t, *J*=5.7 Hz, 2H, H-9). <sup>13</sup>C-NMR (CDCl<sub>3</sub>): 163.0 (d, *J*=246.1 Hz, C-3''); 161.3 (C-6); 152.9 (C-3a); 145.8 (C-9a); 140.5 (d, *J*=6.8 Hz, C-1''); 138.7 (C-1'); 137.2 (C-11'), 135.9 (C-4'); 132.4 (C-11'); 129.9 (d, *J*=7.6 Hz, C-5''); 129.4 (C-2',6'); 125.8 (C-3',5'); 124.5 (C-6''); 115.7 (d, *J*=21.7 Hz, C-2''); 114.3 (d, *J*=21.1 Hz, C-4''); 101.7 (C-5a); 70.5 (C-13'); 69.9 (η<sup>5</sup>-C<sub>5</sub>H<sub>5</sub>); 69.4 (C-15',16'); 68.5 (C-14',17'); 61.7 (C-11); 50.6 (C-2); 49.4 (C-6); 48.3 (C-8); 46.9 (C-1); 44.9 (C-10); 26.8 (C-9). HRMS: *m/z* calc. for [C<sub>35</sub>H<sub>33</sub>FFeN<sub>7</sub>O]<sup>+</sup>: 642.2075 [M+H]<sup>+</sup>; found: 642.2058; mass error: 2.57 ppm

**7-(3,5-Difluorobenzyl)-4-(4-(5-ferrocenyl-1*H*-1,2,3-triazol-1-yl)benzyl)-2,4,6,7,8,9-hexahydroimidazo[1,2-*a*]pyrido[3,4-*e*]pyrimidin-5(1*H*)-one (10b):**

<sup>1</sup>H-NMR (CDCl<sub>3</sub>): 7.80 (s, 1H, H-12'); 7.58 (d, *J*=8.2 Hz, 2H, H-2',6'); 7.33 (d, *J*=8.2 Hz, 2H, H-3',5'); 6.88 (br ~d, *J*~6 Hz, 2H, H-2'',6''); 6.70 (tt, *J*=8.7 Hz and 1.9 Hz, 1H, H-4''); 5.13 (s, 2H, H-

10); 4.25 (br ~s, 2H, H-14',17'); 4.20 (br ~s, 2H, H-15',16'); 4.06 (s, 5H,  $\eta^5$ -C<sub>5</sub>H<sub>5</sub>); 3.92 (br ~s, 4H, H-1,2); 3.64 (s, 2H, H-11); 3.29 (br ~s, 2H, H-6); 2.68 (t,  $J$ =5.7 Hz, 2H, H-8); 2.51 (t,  $J$ =5.7 Hz, 2H, H-9). <sup>13</sup>C-NMR (CDCl<sub>3</sub>): 163.1 (dd,  $J$ =248.6 Hz and 12.7 Hz, C-3'', 5''); 161.3 (C-6); 152.8 (C-3a); 145.8 (C-9a); 142.2 (t,  $J$ =8.4 Hz, C-1''); 138.7 (C-1'); 137.2 (C-11'), 136.0 (C-4'); 132.4 (C-11'); 129.4 (C-2',6'); 125.8 (C-3',5'); 111.4 (dd,  $J$ =20.2 Hz and 4.7 Hz, C-2'',6''); 102.8 (t,  $J$ =25.6 Hz C-4''); 101.6 (C-5a); 70.6 (C-13'); 69.9 ( $\eta^5$ -C<sub>5</sub>H<sub>5</sub>); 69.3 (C-15',16'); 68.5 (C-14',17'); 61.4 (C-11); 50.6 (C-2); 49.4 (C-6); 48.4 (C-8); 46.9 (C-1); 44.9 (C-10); 26.8 (C-9). HRMS:  $m/z$  calc. for [C<sub>35</sub>H<sub>32</sub>F<sub>2</sub>FeN<sub>7</sub>O]<sup>2+</sup>: 330.6027 [M+2H]<sup>2+</sup>; found: 330.6019; mass error: 2.28 ppm

**4-(4-Iodobenzyl)-7-(4-(5-ferrocenyl-1H-1,2,3-triazol-1-yl)benzyl)-2,4,6,7,8,9-hexahydroimidazo[1,2-*a*]pyrido[3,4-*e*]pyrimidin-5(1H)-one (11):**

<sup>1</sup>H-NMR (CDCl<sub>3</sub>): 7.81 (s, 1H, H-12''); 7.60 (d,  $J$ =8.4 Hz, 2H, H-3',5'); 7.47 (d,  $J$ =8.6 Hz, 2H, H-2'',6''); 7.37 (d,  $J$ =8.6 Hz, 2H, H-3'',5''); 7.22 (d,  $J$ =8.4 Hz, 2H, H-2',6'); 4.99 (s, 2H, H-10); 4.26 (br ~s, 2H, H-14'',17''); 4.21 (br ~s, 2H, H-15'',16''); 4.07 (s, 5H,  $\eta^5$ -C<sub>5</sub>H<sub>5</sub>); 3.90 (br ~s, 4H, H-1,2); 3.74 (s, 2H, H-11); 3.33 (br ~s, 2H, H-6); 2.69 (t,  $J$ =5.7 Hz, 2H, H-8); 2.48 (t,  $J$ =5.7 Hz, 2H, H-9). <sup>13</sup>C-NMR (CDCl<sub>3</sub>): 161.4 (C-6); 153.0 (C-3a); 145.6 (C-9a); 139.9 (C-1''); 137.5 (C-3',5'); 137.3 (C-11''); 136.8 (C-1'); 136.1 (C-4''); 132.3 (C-12''); 130.8 (C-2',6'); 129.7 (C-2'',6''); 126.2 (C-3'',5''); 101.9 (C-5a); 93.1 (C-4'); 70.5 (C-13''); 70.0 ( $\eta^5$ -C<sub>5</sub>H<sub>5</sub>); 69.4 (C-15'',16''); 68.7 (C-14'',17''); 61.6 (C-11); 50.7 (C-2); 49.7 (C-6); 48.3 (C-8); 46.9 (C-1); 45.0 (C-10); 26.8 (C-9). HRMS:  $m/z$  calc. for [C<sub>35</sub>H<sub>33</sub>FeIN<sub>7</sub>O]<sup>+</sup>: 750.1135 [M+H]<sup>+</sup>; found: 750.1112; mass error: 3.09 ppm

**7-(3-Fluorobenzyl)-4-(4-(ferrocenylethynyl)benzyl)-2,4,6,7,8,9-hexahydroimidazo[1,2-*a*]pyrido[3,4-*e*]pyrimidin-5(1H)-one (16a):**

<sup>1</sup>H-NMR (CDCl<sub>3</sub>): 7.40-7.38, (overlapping m's, 4H, H-2',3',5',6); 7.25 (m, 1H, H-5''); 7.08 (d,  $J$ =8.4 Hz, 1H, H-6''); 7.05 (dt,  $J$ =9.7 Hz and 2.0 Hz, 1H, H-2''); 6.93 (td,  $J$ =8.5 Hz and 2.1 Hz, 1H, H-4''); 5.03 (s, 2H, H-10); 4.47 (br ~s, 2H, H-14',17'); 4.22 (coalesced br ~s's, 7H, H-15',16' and  $\eta^5$ -C<sub>5</sub>H<sub>5</sub>); 3.89 (s, 4H, H-1,2); 3.63 (s, 2H, H-11); 3.26 (br ~s, 2H, H-6); 2.64 (t,  $J$ =5.7 Hz, 2H, H-8); 2.46 (t,  $J$ =5.7 Hz, 2H, H-9). <sup>13</sup>C-NMR (CDCl<sub>3</sub>): 163.0 (d,  $J$ =246.0 Hz C-3''); 161.4 (C-6); 152.9 (C-3a); 145.6 (C-9a); 140.6 (d,  $J$ =7.3 Hz, C-1''); 136.4 (C-1'); 131.3 (C-2',6'); 129.8 (d,  $J$ =8.6 Hz, C-5''); 128.6 (C-3',5'); 124.5 (C-6''); 123.0 (C-4'); 115.6 (d,  $J$ =21.6 Hz, C-2''); 114.3 (d,  $J$ =21.3 Hz, C-4''); 101.8 (C-5a); 88.2 (C-12'); 85.8 (C-11'); 71.4 (C-14',17'); 70.0 ( $\eta^5$ -C<sub>5</sub>H<sub>5</sub>); 68.8 (C-15',16'); 65.4 (C-13'); 61.7 (C-11); 50.6 (C-2); 49.5 (C-6); 48.3 (C-8); 46.8 (C-1); 45.2 (C-10); 26.8 (C-9). HRMS:  $m/z$  calc. for C<sub>35</sub>H<sub>32</sub>FFeN<sub>4</sub>O]<sup>+</sup>: 599.1904 [M+H]<sup>+</sup>; found: 599.1888; mass error: 2.67 ppm.

**7-(3,5-Difluorobenzyl)-4-(4-(ferrocenylethynyl)benzyl)-2,4,6,7,8,9-hexahydroimidazo[1,2-*a*]pyrido[3,4-*e*]pyrimidin-5(1H)-one (16b):**

<sup>1</sup>H-NMR (CDCl<sub>3</sub>): 7.55 (dd,  $J$ =7.8 Hz and 1.7 Hz, 2H, H-2'',6''); 7.40-7.38, (overlapping m's, 4H, H-2',3',5',6); 6.70 (tt,  $J$ =8.8 Hz and 1.7 Hz, 1H, H-4''); 5.03 (s, 2H, H-10); 4.47 (br ~s, 2H, H-14',17'); 4.21 (coalesced br ~s's, 7H, H-15',16' and  $\eta^5$ -C<sub>5</sub>H<sub>5</sub>); 3.89 (s, 4H, H-1,2); 3.62 (s, 2H, H-11); 3.27 (br ~s, 2H, H-6); 2.66 (t,  $J$ =5.7 Hz, 2H, H-8); 2.47 (t,  $J$ =5.7 Hz, 2H, H-9). <sup>13</sup>C-NMR (CDCl<sub>3</sub>): 163.1 (dd,  $J$ =248.0 Hz and 12.9 Hz, C-3'',5''); 161.5 (C-6); 153.0 (C-3a); 145.6 (C-9a);

142.3 (t,  $J=9.3$  Hz, C-1''); 136.4 (C-1'); 131.3 (C-2',6'); 128.7 (C-3',5'); 123.0 (C-4'); 111.4 (dd,  $J=19.5$  Hz and 4.4 Hz, C-2'',6''); 102.7 (t,  $J=26.0$  Hz, C-4''); 101.6 (C-5a); 88.2 (C-12'); 85.7 (C-11'); 71.4 (C-14',17'); 70.0 ( $\eta^5\text{-C}_5\text{H}_5$ ); 68.8 (C-15',16'); 65.4 (C-13'); 61.4 (C-11); 50.6 (C-2); 49.4 (C-6); 48.4 (C-8); 46.9 (C-1); 45.3 (C-10); 26.8 (C-9). HRMS:  $m/z$  calc. for  $[\text{C}_{35}\text{H}_{31}\text{F}_2\text{FeN}_4\text{O}]^+$ : 617.1810  $[\text{M}+\text{H}]^+$ ; found: 617.1793, mass error: 2.75 ppm

**3-((5-Oxo-4-(4-(ferrocenylethynyl)benzyl)-1,2,4,5,8,9-hexahydroimidazo[1,2-*a*]pyrido[3,4-*e*]pyrimidin-7(6*H*)-yl)methyl)benzonitrile (16c):**

$^1\text{H-NMR}$  ( $\text{CDCl}_3$ ): 7.65 (br s, 1H, H-2''); 7.55 (coalesced br  $\sim$ d's,  $J\sim 8$  Hz, 2H, H-4'',6''); 7.42 (t,  $J=7.6$  Hz, 1H, H-5''); 7.40-7.38, (overlapping m's, 4H, H-2',3',5',6); 5.03 (s, 2H, H-10); 4.47 (br  $\sim$ s, 2H, H-14',17'); 4.21 (coalesced br  $\sim$ s's, 7H, H-15',16' and  $\eta^5\text{-C}_5\text{H}_5$ ); 3.92-3.87 (overlapping m's, 4H, H-1,2); 3.67 (s, 2H, H-11); 3.25 (br  $\sim$ s, 2H, H-6); 2.65 (t,  $J=5.7$  Hz, 2H, H-8); 2.47 (t,  $J=5.7$  Hz, 2H, H-9).  $^{13}\text{C-NMR}$  ( $\text{CDCl}_3$ ): 161.5 (C-6); 152.9 (C-3a); 145.6 (C-9a); 139.8 (C-1''); 136.6 (C-1'); 131.3 (C-2',6'); 133.3 (C-2''); 132.3 (C-6''); 131.1 (C-4''); 129.2 (C-5''); 128.7 (C-3',5'); 123.0 (C-4'); 118.8 (CN); 112.6 (C-3''); 101.5 (C-5a); 88.2 (C-12'); 85.7 (C-11'); 71.4 (C-14',17'); 69.9 ( $\eta^5\text{-C}_5\text{H}_5$ ); 68.8 (C-15',16'); 65.4 (C-13'); 61.3 (C-11); 50.6 (C-2); 49.4 (C-6); 48.5 (C-8); 46.9 (C-1); 45.2 (C-10); 26.7 (C-9). HRMS:  $m/z$  calc. for  $[\text{C}_{36}\text{H}_{32}\text{FeN}_5\text{O}]^+$ : 606.1951  $[\text{M}+\text{H}]^+$ ; found: 606.1930; mass error: 3.42 ppm

**7-(4-(4-Ferrocenyl-1*H*-1,2,3-triazol-1-yl)benzyl)-4-(4-(ferrocenylethynyl)benzyl)-2,4,6,7,8,9-hexahydroimidazo[1,2-*a*]pyrido[3,4-*e*]pyrimidin-5(1*H*)-one (16d):**

$^1\text{H-NMR}$  ( $\text{CDCl}_3$ ): 7.88 (s, 1H, H-11''); 7.73 (d,  $J=8.2$  Hz, 2H, H-3'',5''); 7.50 (d,  $J=8.2$  Hz, 2H, H-2'',6''); 7.40-7.38, (overlapping m's, 4H, H-2',3',5',6); 5.04 (s, 2H, H-10); 4.79 (br  $\sim$ s, 2H, H-14'',17''); 4.48 (br  $\sim$ s, 2H, H-14',17'); 4.34 (br  $\sim$ s, 2H, H-15'',16''); 4.22 (coalesced br  $\sim$ s's, 7H, H-15',16' and  $\eta^5\text{-C}_5\text{H}_5$  (1)); 4.12 (s, 5H,  $\eta^5\text{-C}_5\text{H}_5$  (2)); 3.90 (br  $\sim$ s, 4H, H-1,2); 3.74 (s, 2H, H-11); 3.31 (br  $\sim$ s, 2H, H-6); 2.70 (t,  $J=5.7$  Hz, 2H, H-8); 2.49 (t,  $J=5.7$  Hz, 2H, H-9).  $^{13}\text{C-NMR}$  ( $\text{CDCl}_3$ ): 161.5 (C-6); 153.1 (C-3a); 147.7 (C-12''); 145.6 (C-9a); 138.6 (C-1''); 136.5 (C-1'); 136.3 (C-4''); 131.3 (C-2',6'); 130.3 (C-2'',6''); 128.7 (C-3',5'); 123.1 (C-4'); 120.4 (C-3'',5''); 116.7 (C-11''); 101.7 (C-5a); 88.2 (C-12'); 85.7 (C-11'); 75.1 (C-13''); 71.4 (C-14',17'); 70.0 ( $\eta^5\text{-C}_5\text{H}_5$  (1)); 69.6 ( $\eta^5\text{-C}_5\text{H}_5$  (2)); 68.82 (C-15'',16''); 68.77 (C-15',16'); 66.9 (C-14'',17''); 65.4 (C-13'); 61.6 (C-11); 50.6 (C-2); 49.4 (C-6); 48.4 (C-8); 46.9 (C-1); 45.3 (C-10); 26.8 (C-9). HRMS:  $m/z$  calc. for  $[\text{C}_{47}\text{H}_{42}\text{Fe}_2\text{N}_7\text{O}]^+$ : 832.2144  $[\text{M}+\text{H}]^+$ ; found: 832.2120; mass error: 2.90 ppm.

**3-((4-(4-(3-Aminoprop-1-yn-1-yl)benzyl)-5-oxo-1,2,4,5,8,9-hexahydroimidazo[1,2-*a*]pyrido[3,4-*e*]pyrimidin-7(6*H*)-yl)methyl)benzonitrile (17a):**

$^1\text{H-NMR}$  ( $\text{CDCl}_3$ ): 7.65 (br s, 1H, H-2''); 7.55 (two coalesced dd's,  $J=7.6$  Hz and 1.4 Hz, 2H, H-4'',6''); 7.41 (t,  $J=7.6$  Hz, 1H, H-5''); 7.37 (d,  $J=8.3$  Hz, 2H, H-2',6'); 7.31 (d,  $J=8.3$  Hz, 2H, H-3',5'); 5.01 (s, 2H, H-10); 3.89 (br  $\sim$ s, 4H, H-1,2); 3.67 (s, 2H, H-11); 3.25 (br  $\sim$ s, 2H, H-6); 3.62 (br s, 2H, H-13'); 2.67 (t,  $J=5.7$  Hz, 2H, H-8); 2.48 (t,  $J=5.7$  Hz, 2H, H-9); 1.65 (br s, 2H,  $\text{NH}_2$ ).  $^{13}\text{C-NMR}$  ( $\text{CDCl}_3$ ): 161.3 (C-6); 153.1 (C-3a); 145.5 (C-9a); 139.7 (C-1''); 136.8 (C-1'); 133.2 (C-2''); 132.3 (C-6''); 131.5 (C-2',6'); 131.1 (C-4''); 129.2 (C-5''); 128.5 (C-3',5'); 122.3 (C-4'); 118.8 (CN); 112.6 (C-3''); 90.2 (C-12'); 82.4 (C-11'); 61.3 (C-11); 50.6 (C-2); 49.3 (C-6); 48.5 (C-8); 46.9

(C-1); 45.2 (C-10); 32.2 (C-13'); 26.7 (C-9). HRMS:  $m/z$  calc. for  $[C_{27}H_{27}N_6O]^+$ : 451.2241  $[M+H]^+$ ; found: 451.2234; mass error: 1.52 ppm

**4-(4-(3-Aminoprop-1-yn-1-yl)benzyl)-7-(4-(5-ferrocenyl-1H-1,2,3-triazol-1-yl)benzyl)-2,4,6,7,8,9-hexahydroimidazo[1,2-a]pyrido[3,4-e]pyrimidin-5(1H)-one (17b):**

$^1H$ -NMR ( $CDCl_3$ ): 7.79 (s, 1H, H-12''); 7.45 (d,  $J=8.6$  Hz, 2H, H-2'',6''); 7.37 (d,  $J=8.1$  Hz, 2H, H-2',6'); 7.35 (d,  $J=8.6$  Hz, 2H, H-3'',5''); 7.30 (d,  $J=8.1$  Hz, 2H, H-3',5'); 5.01 (s, 2H, H-10); 4.23 (t,  $J=1.6$  Hz, 2H, H-14'',17''); 4.18 (t,  $J=1.6$  Hz, 2H, H-15'',16''); 4.05 (s, 5H,  $\eta^5-C_5H_5$ ); 3.87 (br ~s, 4H, H-1,2); 3.72 (s, 2H, H-11); 3.60 (br s, 2H, H-13'); 3.31 (br ~s, 2H, H-6); 2.67 (t,  $J=5.7$  Hz, 2H, H-8); 2.46 (t,  $J=5.7$  Hz, 2H, H-9); 1.74 (br s, 2H,  $NH_2$ ).  $^{13}C$ -NMR ( $CDCl_3$ ): 161.4 (C-6); 152.9 (C-3a); 145.7 (C-9a); 139.8 (C-1''); 137.3 (C-11''); 136.9 (C-1'); 135.9 (C-4''); 132.4 (C-12''); 131.5 (C-3',5'); 129.6 (C-2'',6''); 128.5 (C-2',6'); 126.0 (C-3'',5''); 122.0 (C-4'); 101.6 (C-5a); 90.1 (C-12'); 82.4 (C-11'); 70.5 (C-13''); 69.9 ( $\eta^5-C_5H_5$ ); 69.4 (C-15'',16''); 68.4 (C-14'',17''); 61.6 (C-11); 50.6 (C-2); 49.6 (C-6); 48.3 (C-8); 46.9 (C-1); 45.1 (C-10); 32.2 (C-13'); 26.7 (C-9). HRMS:  $m/z$  calc. for  $[C_{38}H_{37}FeN_8O]^+$ : 677.2434  $[M+H]^+$ ; found: 677.2402. mass error: 4.76 ppm.

**4-(4-(3-Aminoprop-1-yn-1-yl)benzyl)-7-(4-(4-ferrocenyl-1H-1,2,3-triazol-1-yl)benzyl)-2,4,6,7,8,9-hexahydroimidazo[1,2-a]pyrido[3,4-e]pyrimidin-5(1H)-one (17c):**

$^1H$ -NMR ( $CDCl_3$ ): 7.87 (s, 1H, H-11''); 7.72 (d,  $J=8.3$  Hz, 2H, H-3'',5''); 7.50 (d,  $J=8.3$  Hz, 2H, H-2'',6''); 7.37 (d,  $J=8.1$  Hz, 2H, H-2',6'); 7.32 (d,  $J=8.1$  Hz, 2H, H-3',5'); 5.02 (s, 2H, H-10); 4.79 (t,  $J=1.8$  Hz, 2H, H-14'',17''); 4.34 (t,  $J=1.8$  Hz, 2H, H-15'',16''); 4.12 (s, 5H,  $\eta^5-C_5H_5$ ); 3.90 (br ~s, 4H, H-1,2); 3.72 (s, 2H, H-11); 3.65 (br s, 2H, H-13'); 3.30 (br ~s, 2H, H-6); 2.70 (t,  $J=5.7$  Hz, 2H, H-8); 2.49 (t,  $J=5.7$  Hz, 2H, H-9); 1.77 (br s, 2H,  $NH_2$ ).  $^{13}C$ -NMR ( $CDCl_3$ ): 161.4 (C-6); 152.9 (C-3a); 147.6 (C-12''); 145.6 (C-9a); 138.5 (C-1''); 136.8 (C-1'); 136.3 (C-4''); 131.5 (C-3',5'); 130.2 (C-2'',6''); 128.5 (C-2',6'); 122.3 (C-4'); 120.4 (C-3'',5''); 116.6 (C-11''); 101.8 (C-5a); 90.1 (C-12'); 82.4 (C-11'); 74.9 (C-13''); 69.7 ( $\eta^5-C_5H_5$ ); 68.9 (C-15'',16''); 66.8 (C-14'',17''); 61.6 (C-11); 50.6 (C-2); 49.4 (C-6); 48.4 (C-8); 46.9 (C-1); 45.2 (C-10); 32.2 (C-13'); 26.8 (C-9). HRMS:  $m/z$  calc. for  $[C_{38}H_{37}FeN_8O]^+$ : 677.2434  $[M+H]^+$ ; found: 677.2404; mass error: 4.46 ppm.

**4-(4-(3-Aminoprop-1-yn-1-yl)benzyl)-7-(4-(4-phenyl-1H-1,2,3-triazol-1-yl)benzyl)-2,4,6,7,8,9-hexahydroimidazo[1,2-a]pyrido[3,4-e]pyrimidin-5(1H)-one (17d):**

$^1H$ -NMR ( $CDCl_3$ ): 8.18 (s, 1H, H-11''); 7.91 (dd,  $J=7.8$  Hz and 2.1 Hz, 2H, H-14'',18''); 7.73 (d,  $J=8.3$  Hz, 2H, H-3'',5''); 7.50 (d,  $J=8.3$  Hz, 2H, H-2'',6''); 7.46 (t,  $J=7.8$  Hz, 2H, H-15'',17''); 7.37 and 7.36 (partly overlapping d ( $J=8.2$  Hz) and tt ( $J=7.8$  Hz and 2.1 Hz), 3H, H-2',6' and H-16''); 7.31 (d,  $J=8.2$  Hz, 2H, H-3',5'); 5.02 (s, 2H, H-10); 3.89 (br ~s, 4H, H-1,2); 3.71 (s, 2H, H-11); 3.62 (br s, 2H, H-13'); 3.30 (br ~s, 2H, H-6); 2.71 (t,  $J=5.7$  Hz, 2H, H-8); 2.48 (t,  $J=5.7$  Hz, 2H, H-9); 1.65 (br s, 2H,  $NH_2$ ).  $^{13}C$ -NMR ( $CDCl_3$ ): 161.5 (C-6); 153.0 (C-3a); 148.5 (C-12''); 145.6 (C-9a); 138.9 (C-1''); 136.8 (C-1'); 136.2 (C-4''); 131.5 (C-3',5'); 130.3 (C-2'',6''); 129.9 (C-13''); 128.9 (C-15'',17''); 128.6 (C-2',6'); 128.5 (C-16''); 125.9 (C-14'',18''); 122.3 (C-4'); 120.7 (C-3'',5''); 117.7 (C-11''); 101.8 (C-5a); 90.1 (C-12'); 82.5 (C-11'); 61.6 (C-11); 50.6 (C-2); 49.4 (C-6); 48.4 (C-8); 46.9 (C-1); 45.2 (C-10); 32.2 (C-13'); 27.0 (C-9). HRMS:  $m/z$  calc. for  $[C_{34}H_{33}N_8O]^+$ : 569.2772  $[M+H]^+$ ; found: 569.2765; mass error: 1.20 ppm.

---

**7-(3-cyanobenzyl)-4-(4-ethynylbenzyl)-2,4,6,7,8,9-hexahydroimidazo[1,2-*a*]pyrido[3,4-*e*]pyrimidin-5(1*H*)-one (18):**

<sup>1</sup>H-NMR (CDCl<sub>3</sub>): 7.67 (br ~t, *J*~2 Hz, 1H, H-2''); 7.52-7.57 (overlapping m's, 2H, H-4'' and H-6''); 7.42 (t, *J*=7.8 Hz, 1H, H-5''); 7.40 (br ~s 4H, H-2',3',5',6'); 5.04 (s, 2H, H-10); 3.90 (s, 4H, H-1,2); 3.68 (s, 2H, H-11); 3.26 (br s, 2H, H-6); 3.03 (s, 1H, H-12'); 2.68, (t, *J*=5.6 Hz, 2H, H-8); 2.50 (t, 2H, *J*=5.6 Hz, H-9). <sup>13</sup>C-NMR (CDCl<sub>3</sub>): 161.3 (C-5); 152.9 (C-3a); 145.6 (C-9a); 139.7 (C-1''); 137.7 (C-1'); 133.2 (C-2''); 132.3 (C-6''); 132.1 (C-3',5'); 131.1 (C-4''); 129.3 (C-5''); 128.5 (C-2',6'); 121.2 (C-4'); 118.8 (C≡N); 112.6 (C-3''); 101.5 (C-5a); 83.7 (C-11'); 77.06 (coalesced with the central line of the solvent signal, C-12'), 61.3 (C-11); 50.6 (C-2); 49.3 (C-6); 48.5 (C-8); 46.9 (C-1); 45.1 (C-10); 26.7 (C-9).

### S.3. Copies of the $^1\text{H}$ - and $^{13}\text{C}$ -NMR spectra

#### $^1\text{H}$ -NMR of 7bf

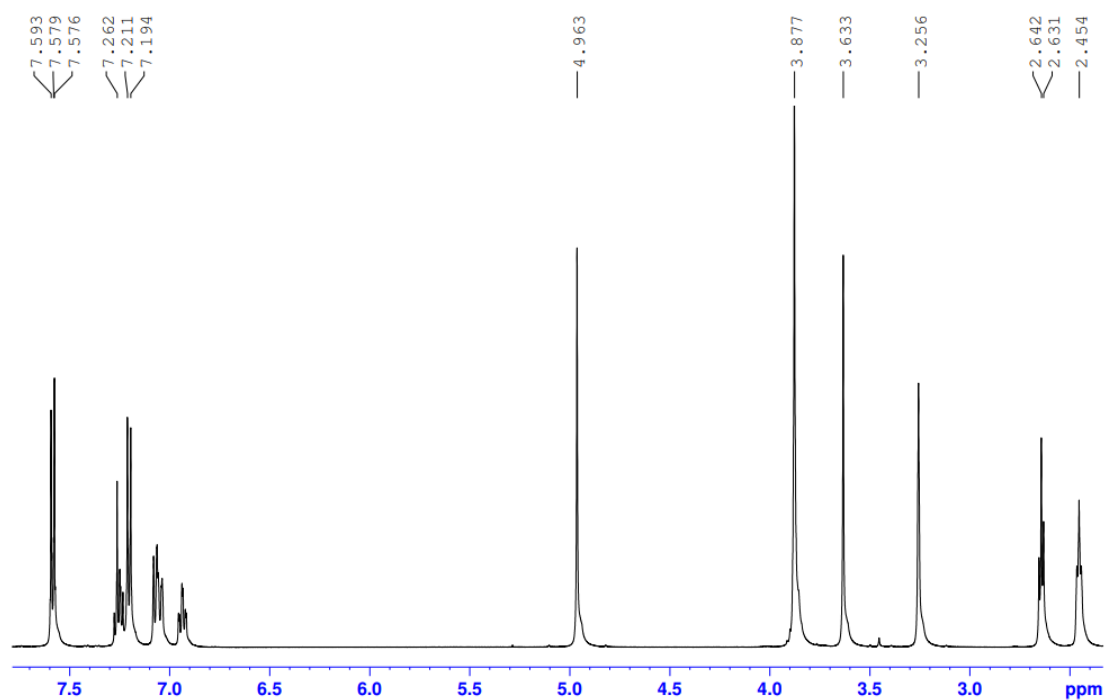

#### $^{13}\text{C}$ -NMR of 7bf

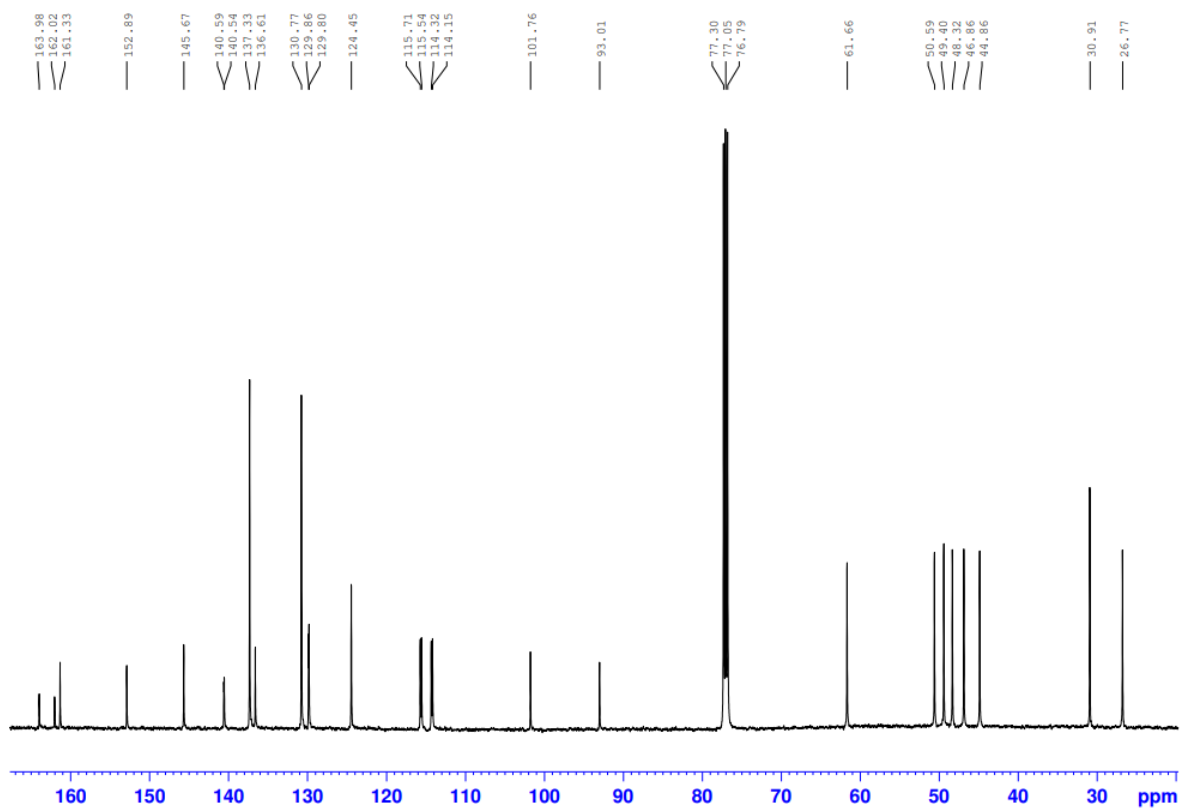

### <sup>1</sup>H-NMR of 7bh

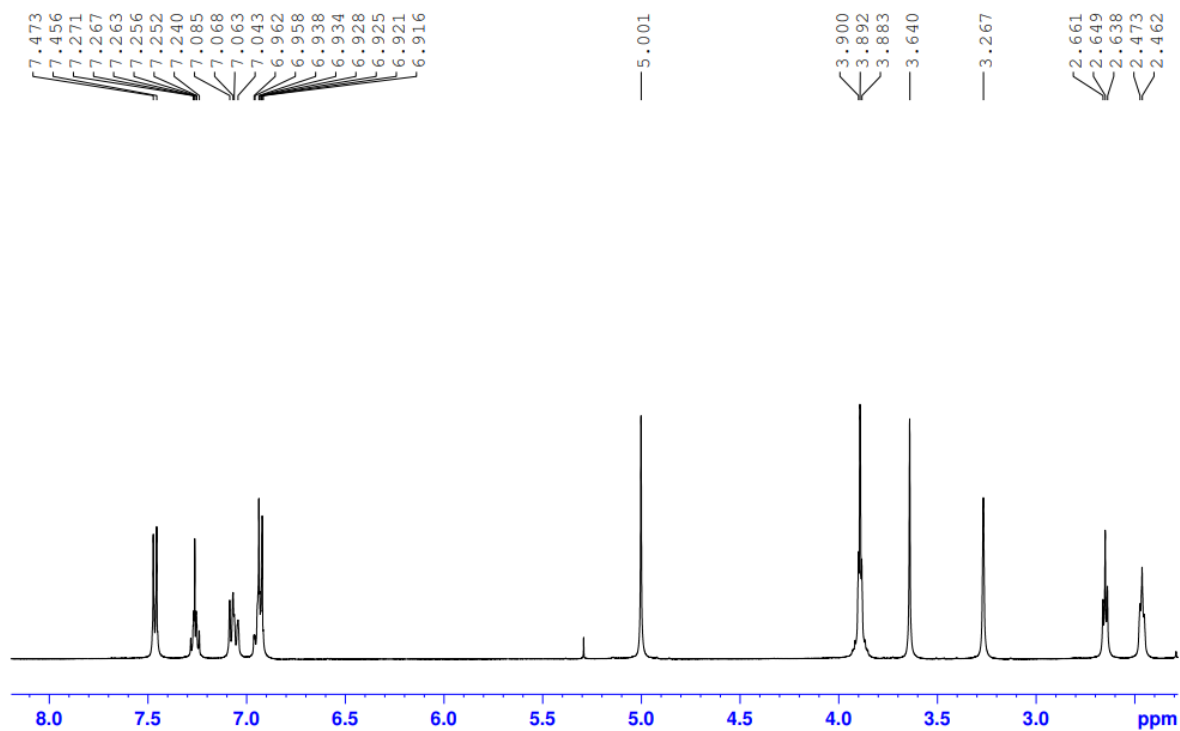

### <sup>13</sup>C-NMR of 7bh

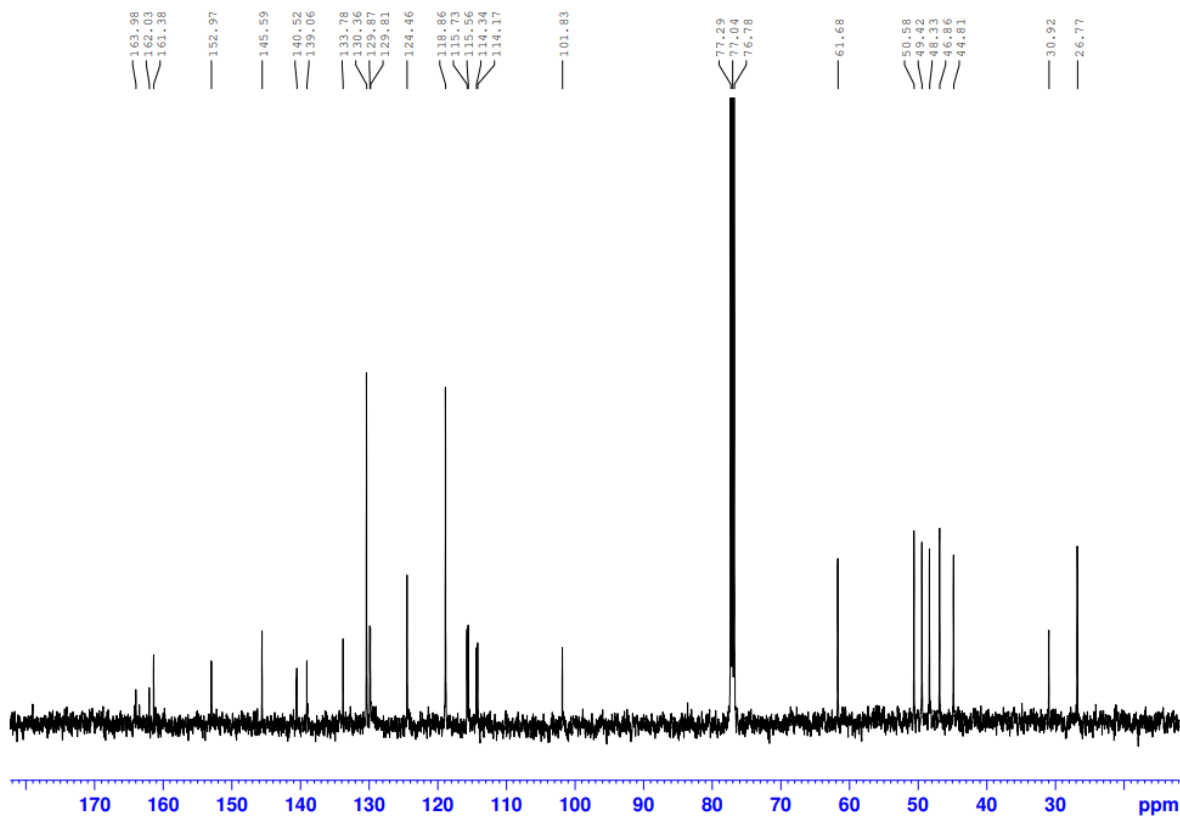



### <sup>1</sup>H-NMR of 7cf

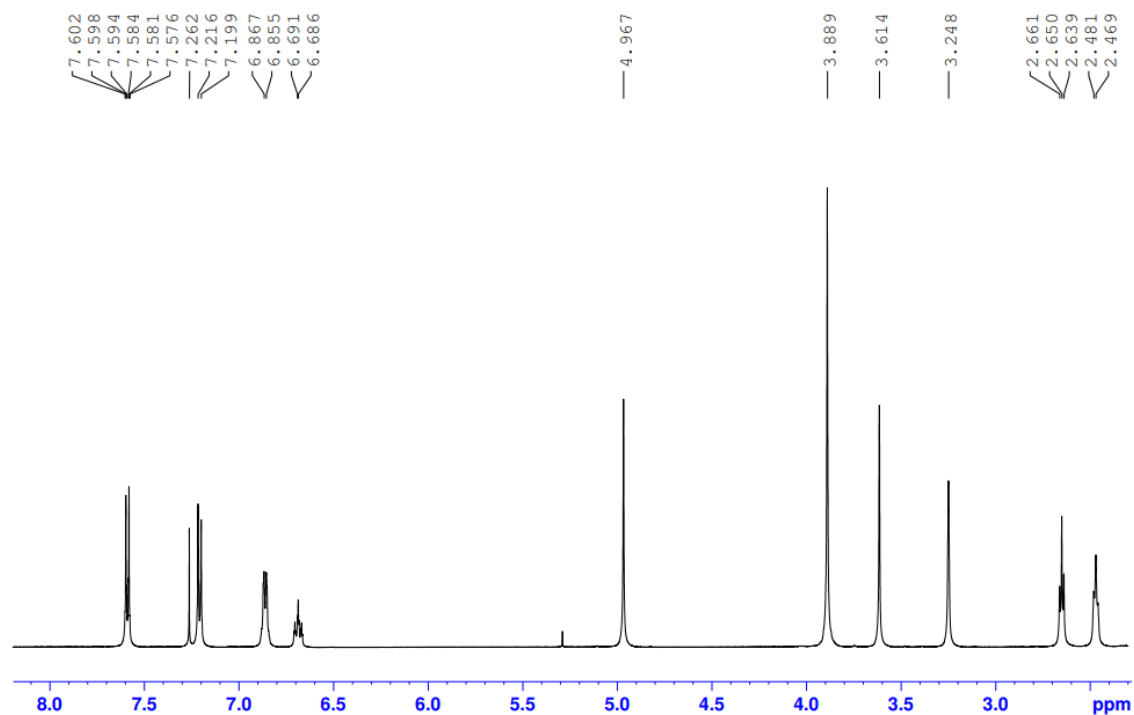

### <sup>13</sup>C-NMR of 7cf

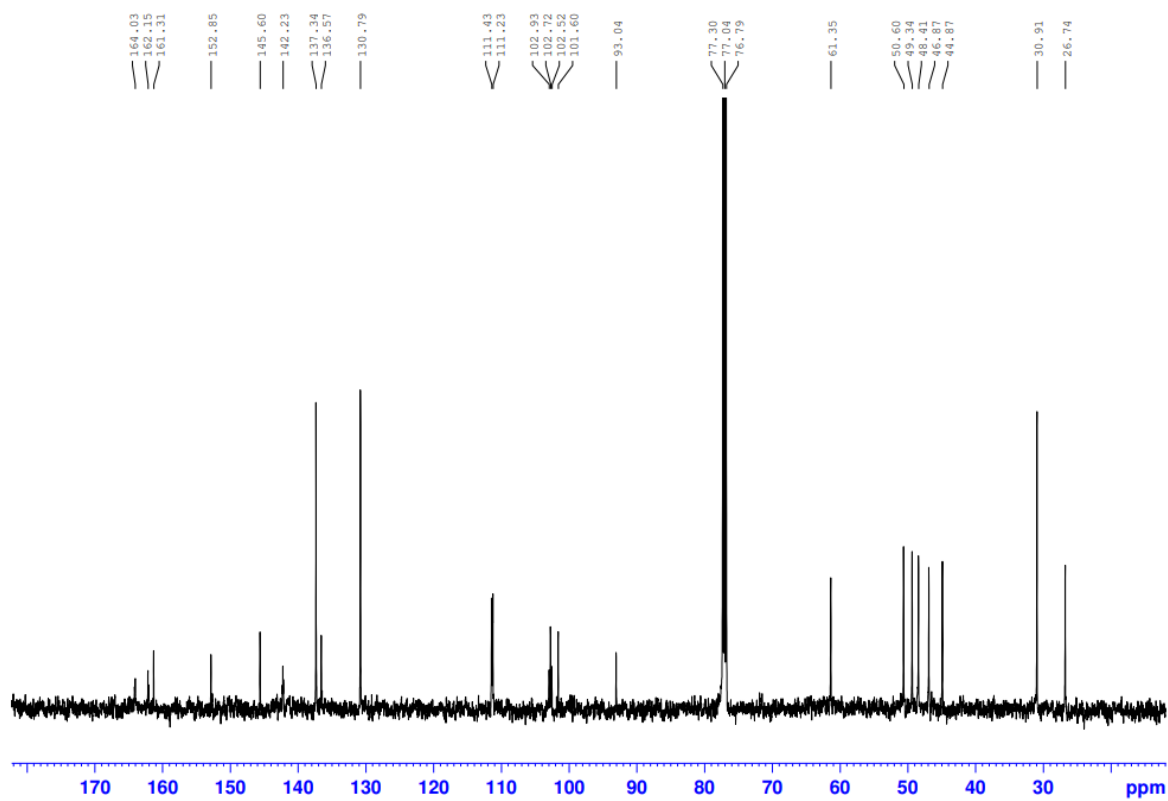

# <sup>1</sup>H-NMR of 7ch

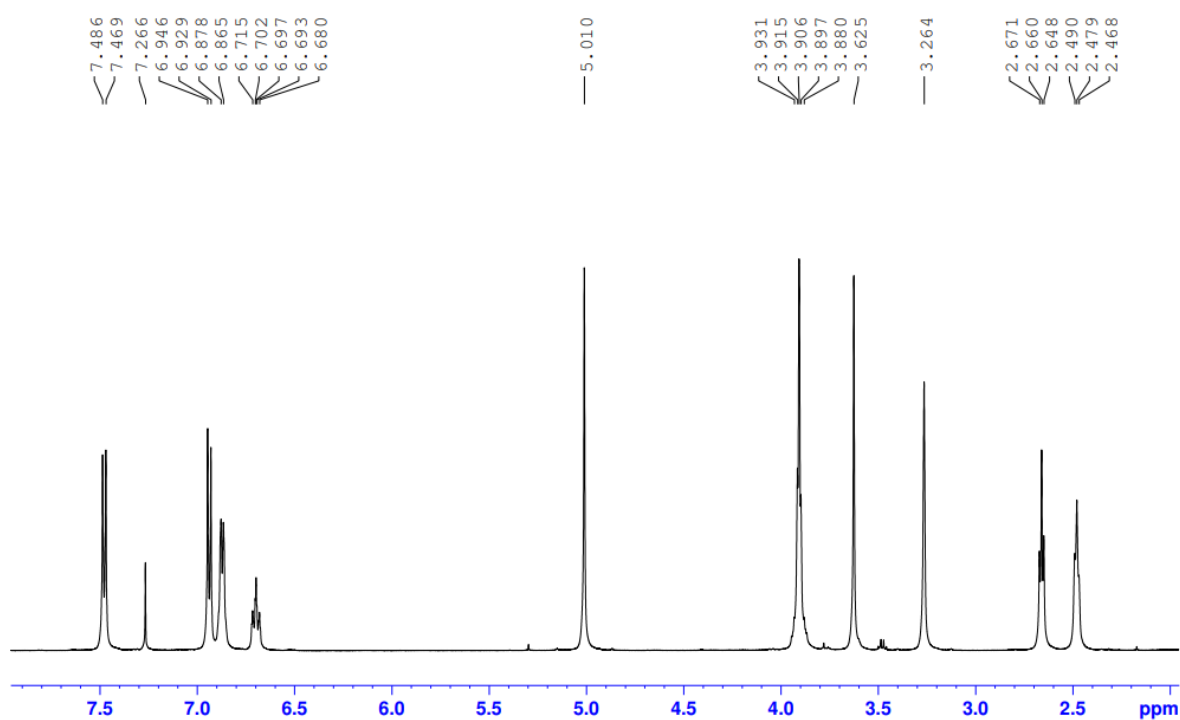

# <sup>13</sup>C-NMR of 7ch

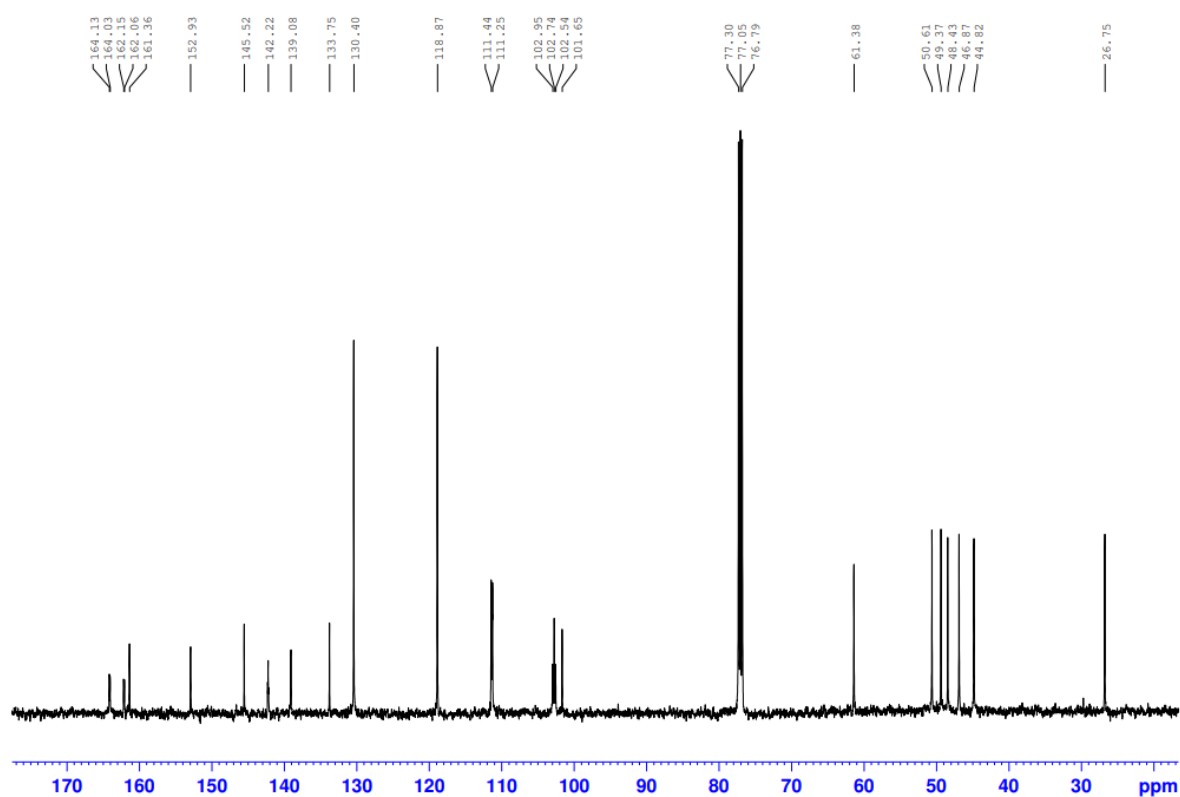

# <sup>1</sup>H-NMR of 7df

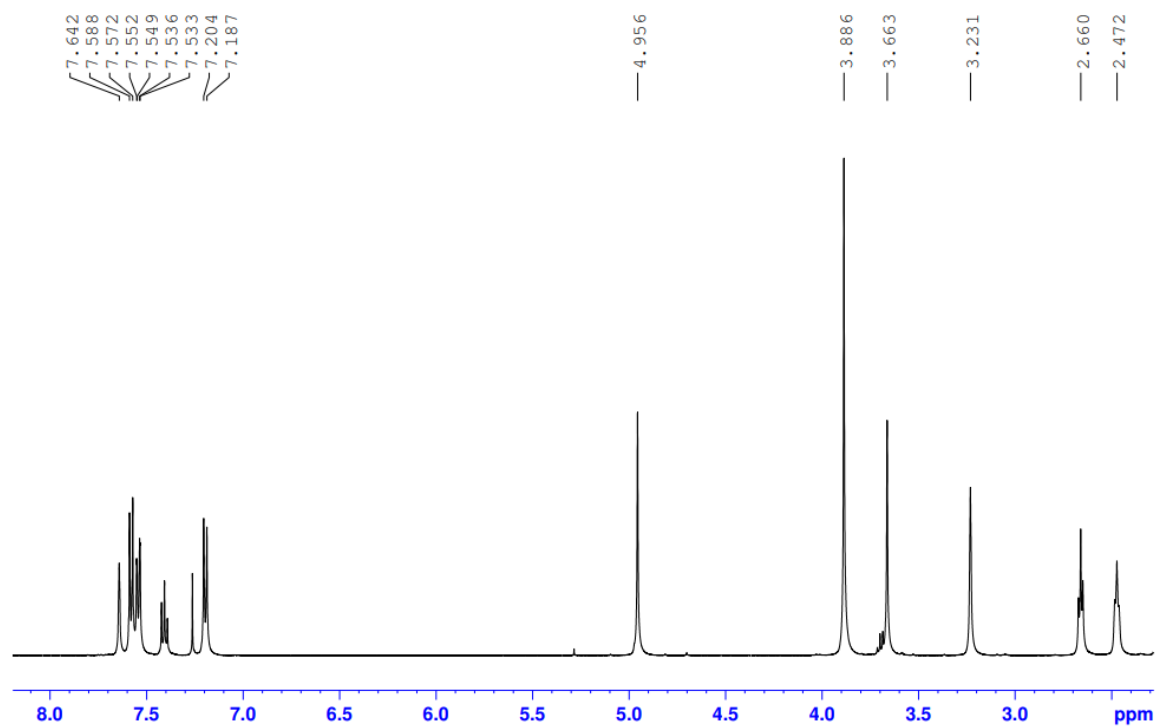

# <sup>13</sup>C-NMR of 7df

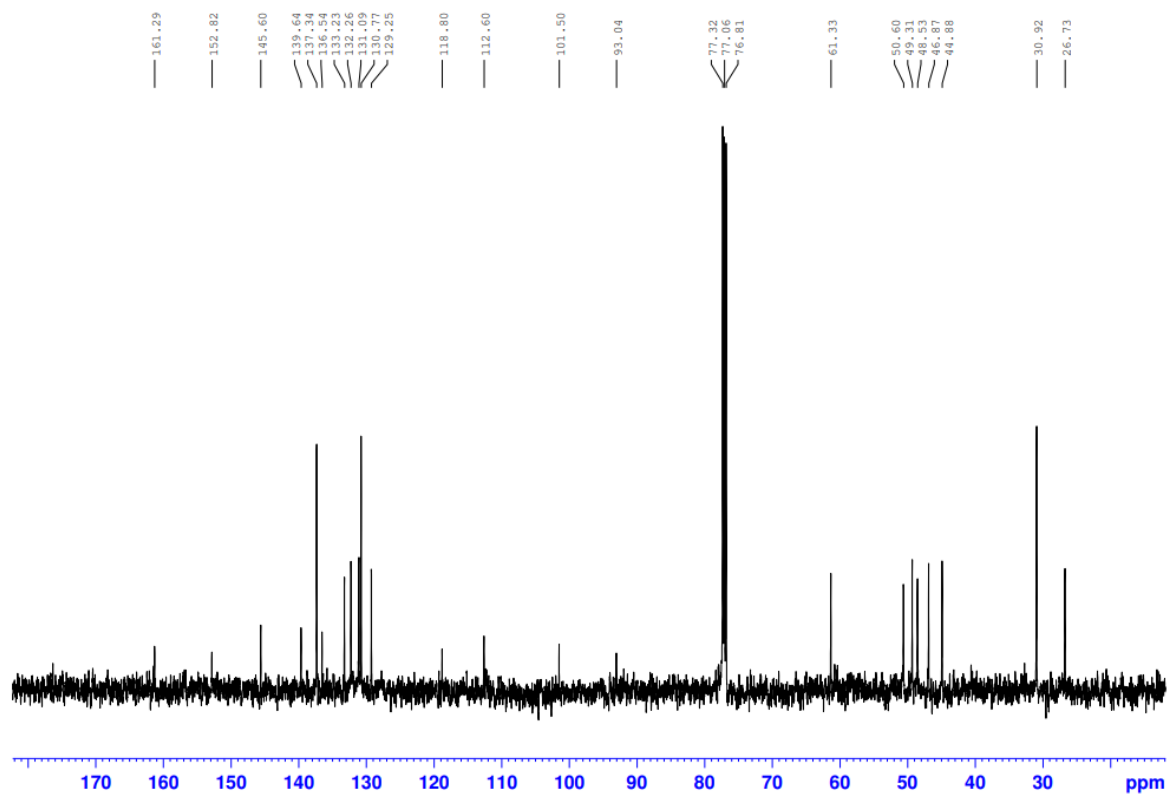

### $^1\text{H}$ -NMR of 7hf

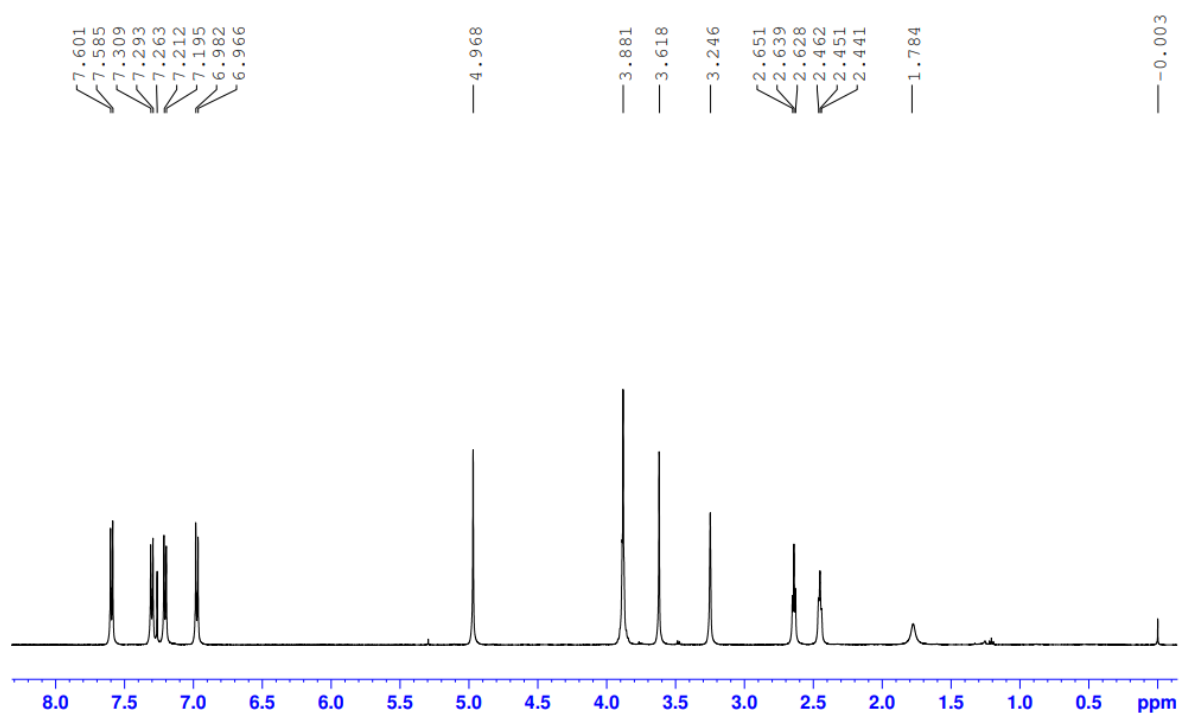

### $^{13}\text{C}$ -NMR of 7hf

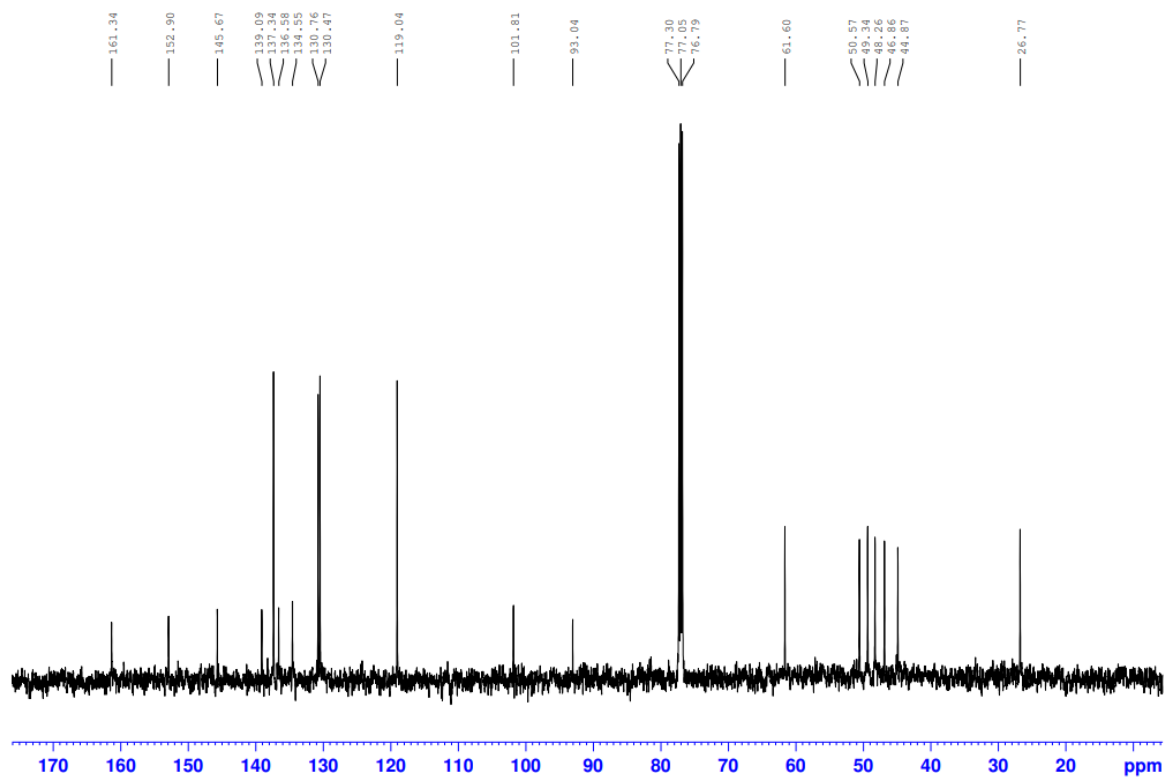

### <sup>1</sup>H-NMR of 7hg

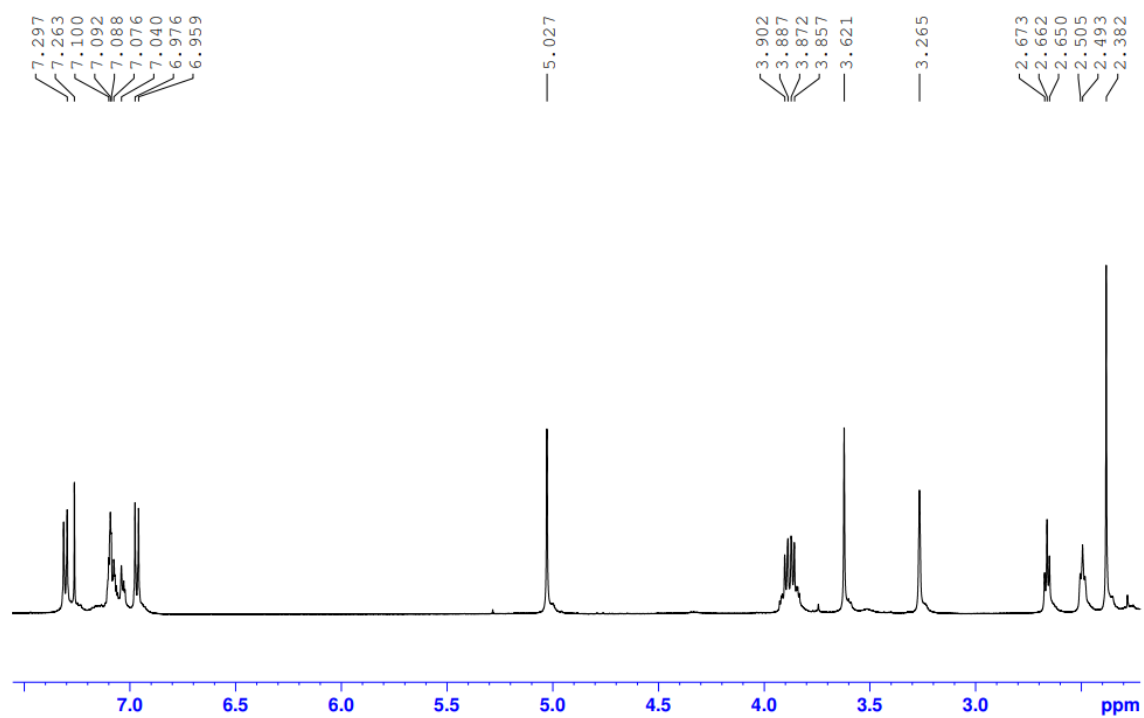

### <sup>13</sup>C-NMR of 7hg

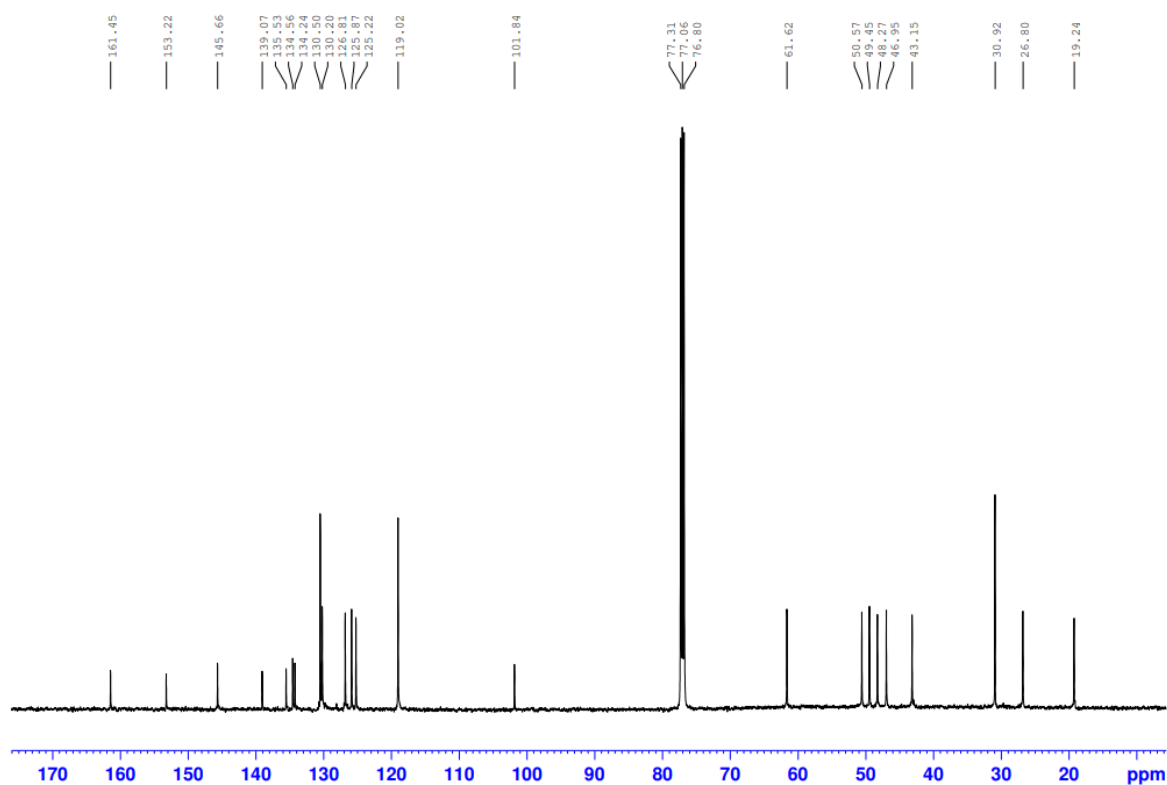

### <sup>1</sup>H-NMR of 9a

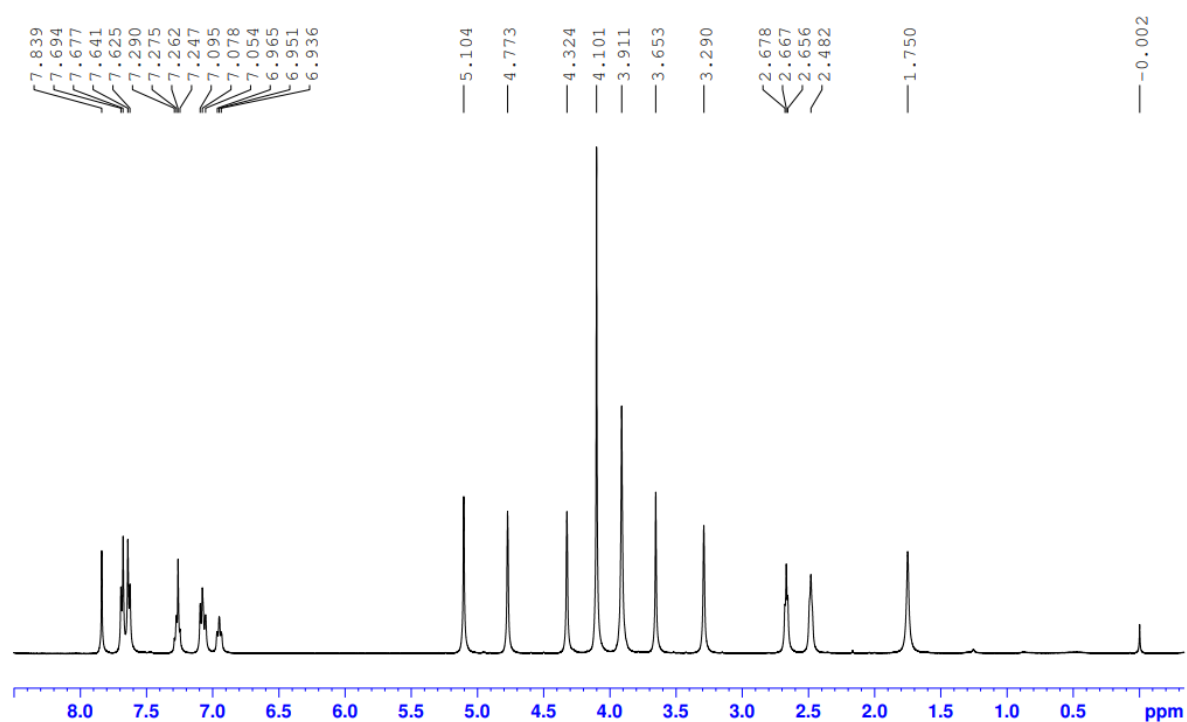

### <sup>13</sup>C-NMR of 9a

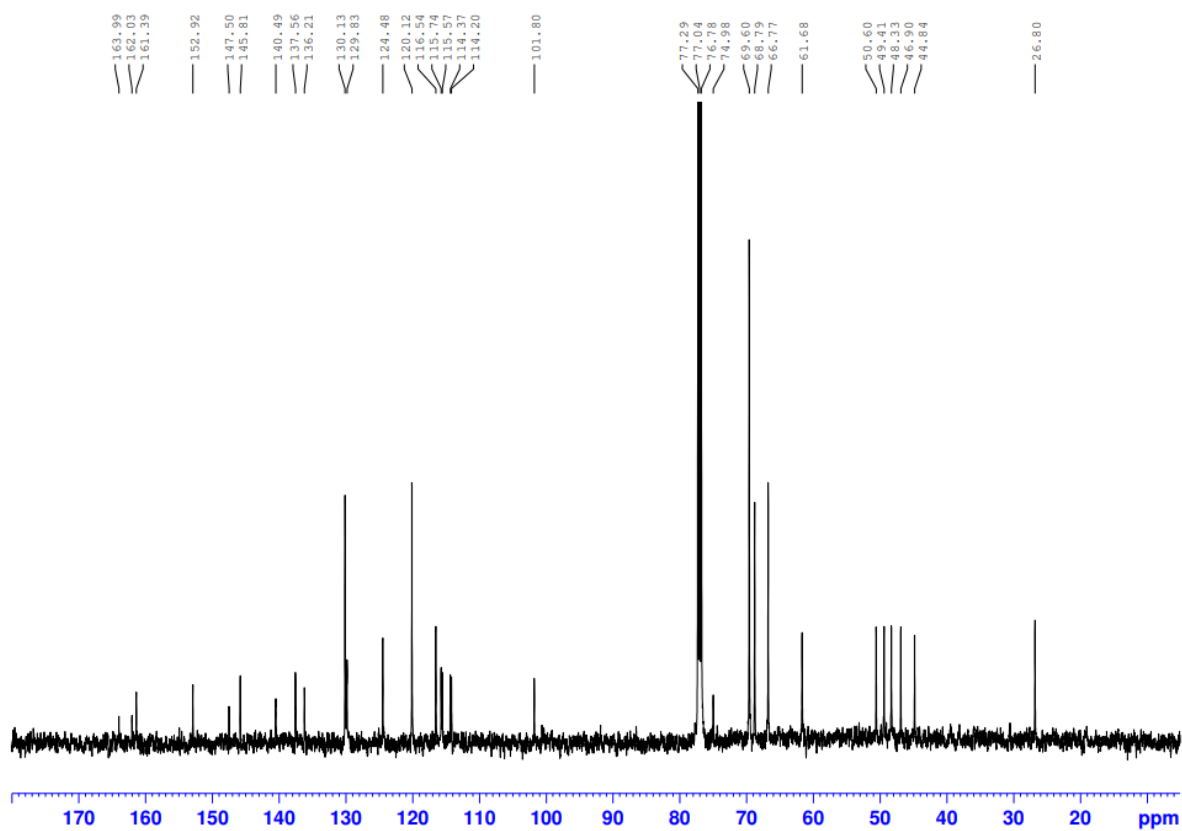

### <sup>1</sup>H-NMR of 9b

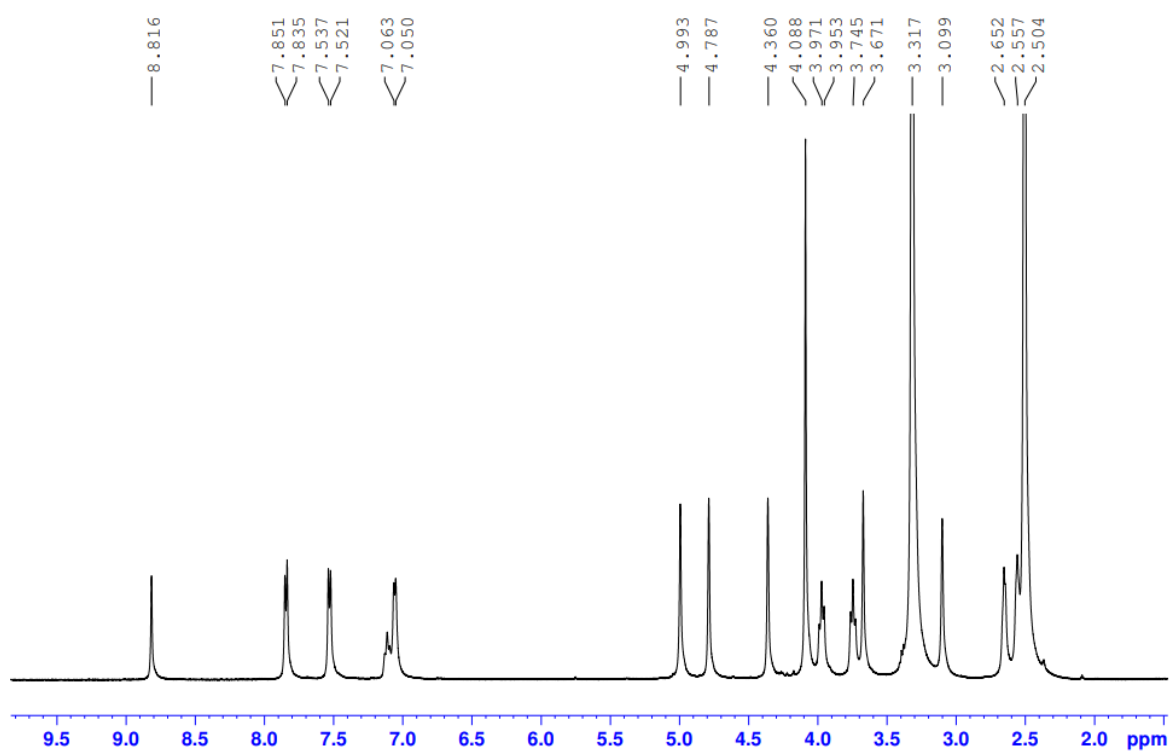

### <sup>1</sup>H-NMR of 10a

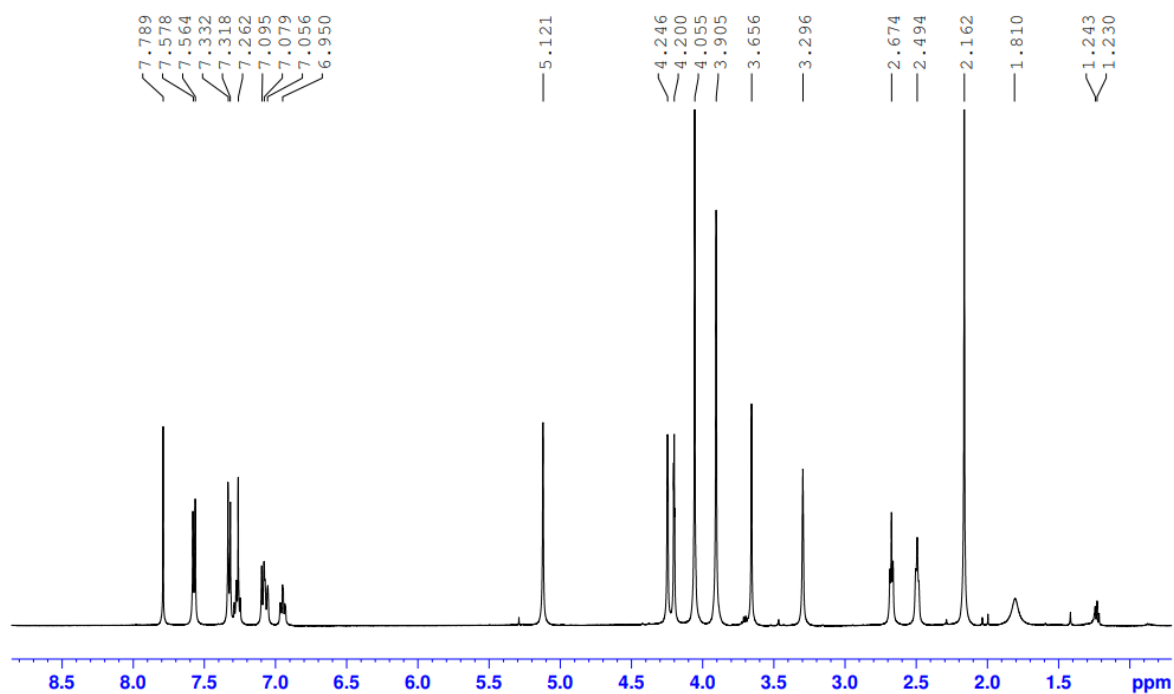

### $^{13}\text{C}$ -NMR of 10a

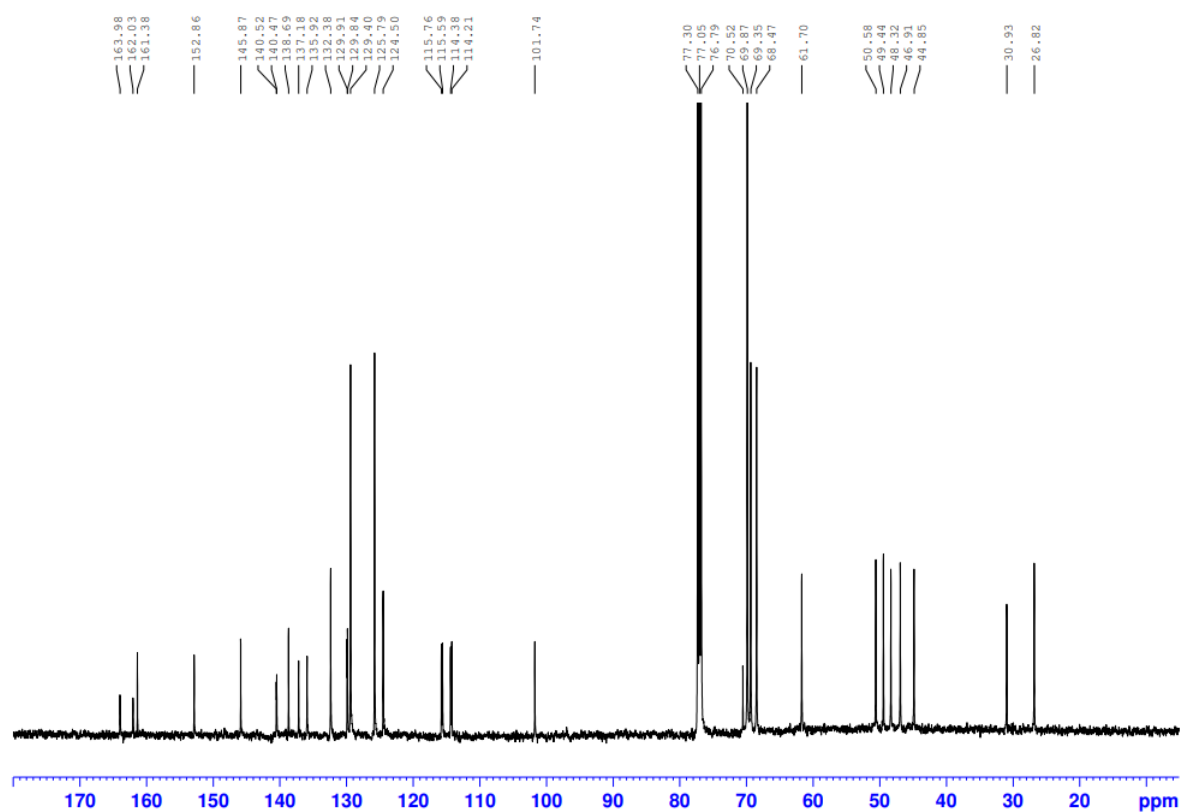

### $^1\text{H}$ -NMR of 10b

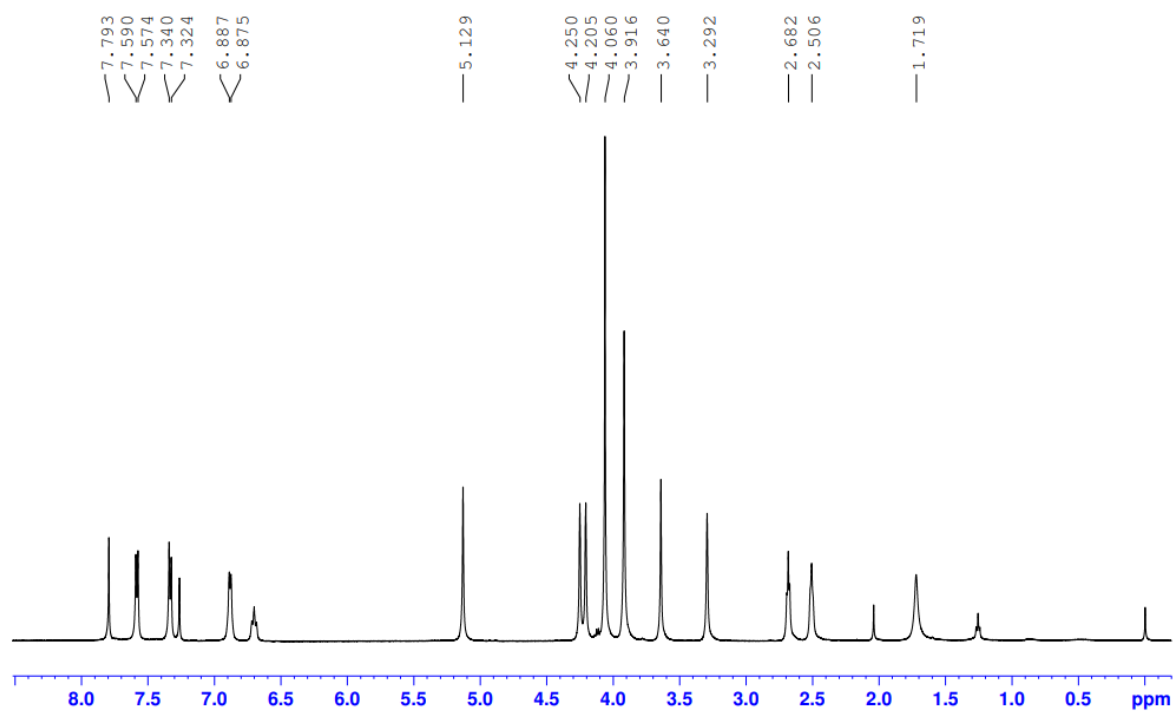



### <sup>13</sup>C-NMR of 10b

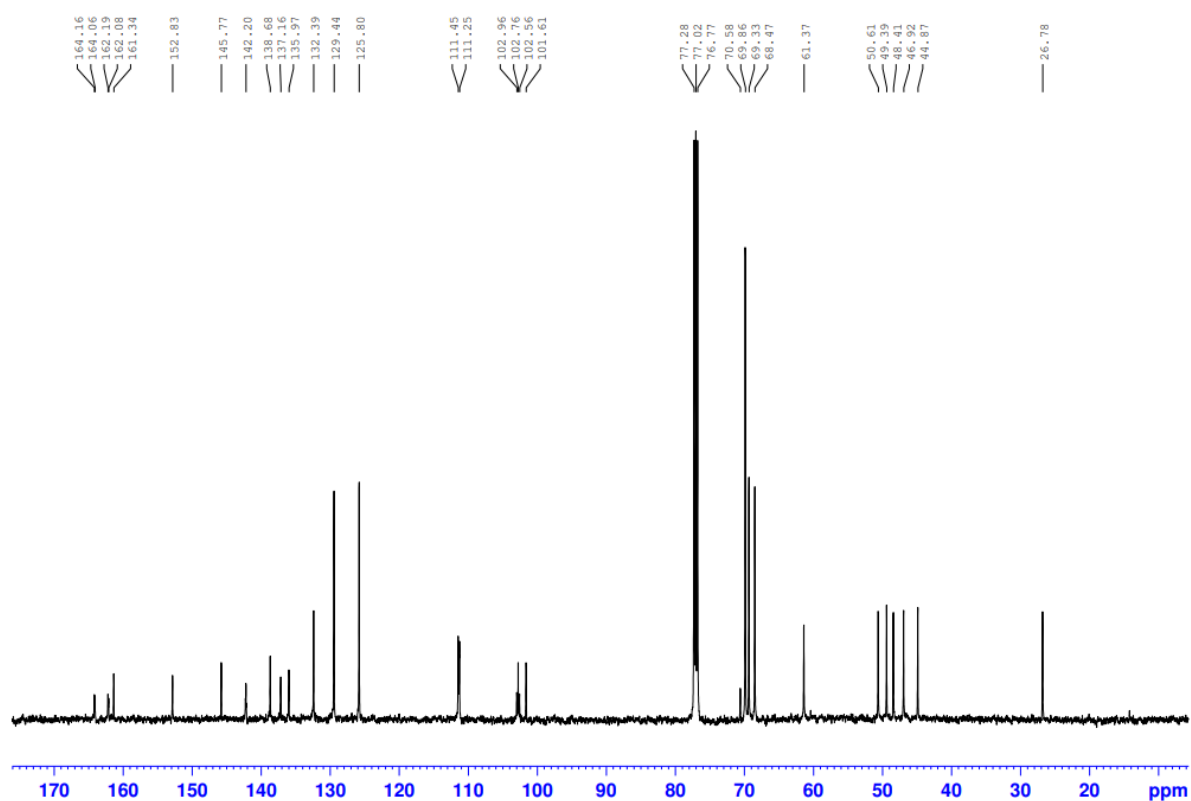

### <sup>1</sup>H-NMR of 11

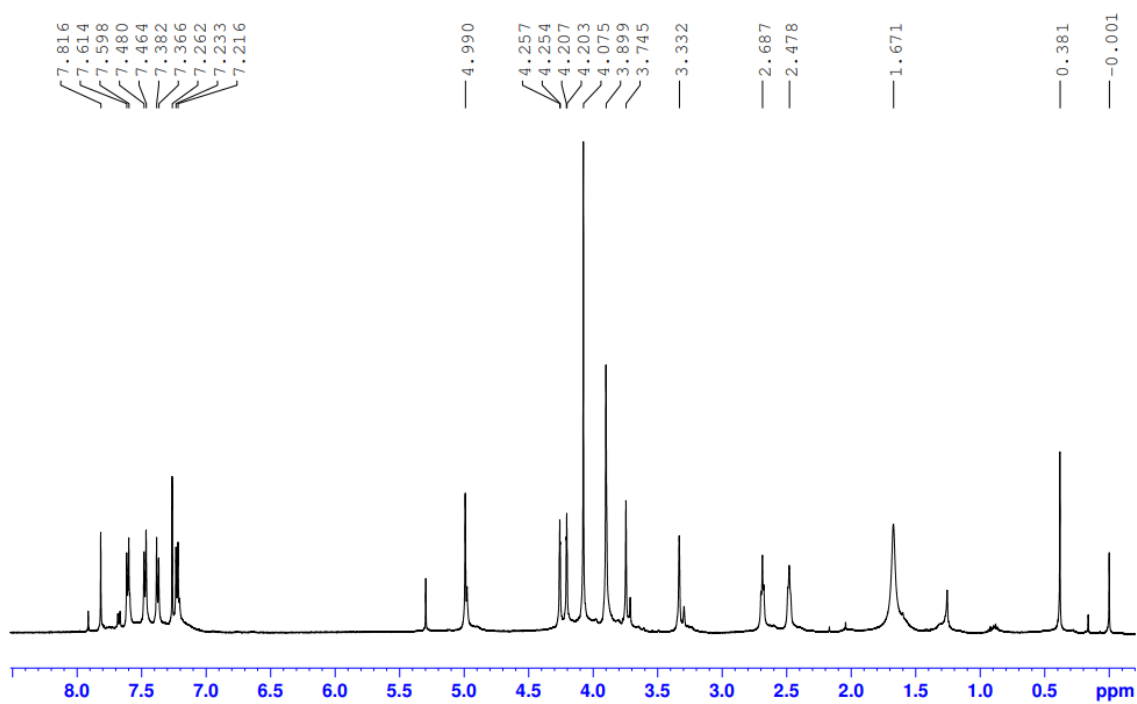

**<sup>1</sup>H-NMR of 12a**

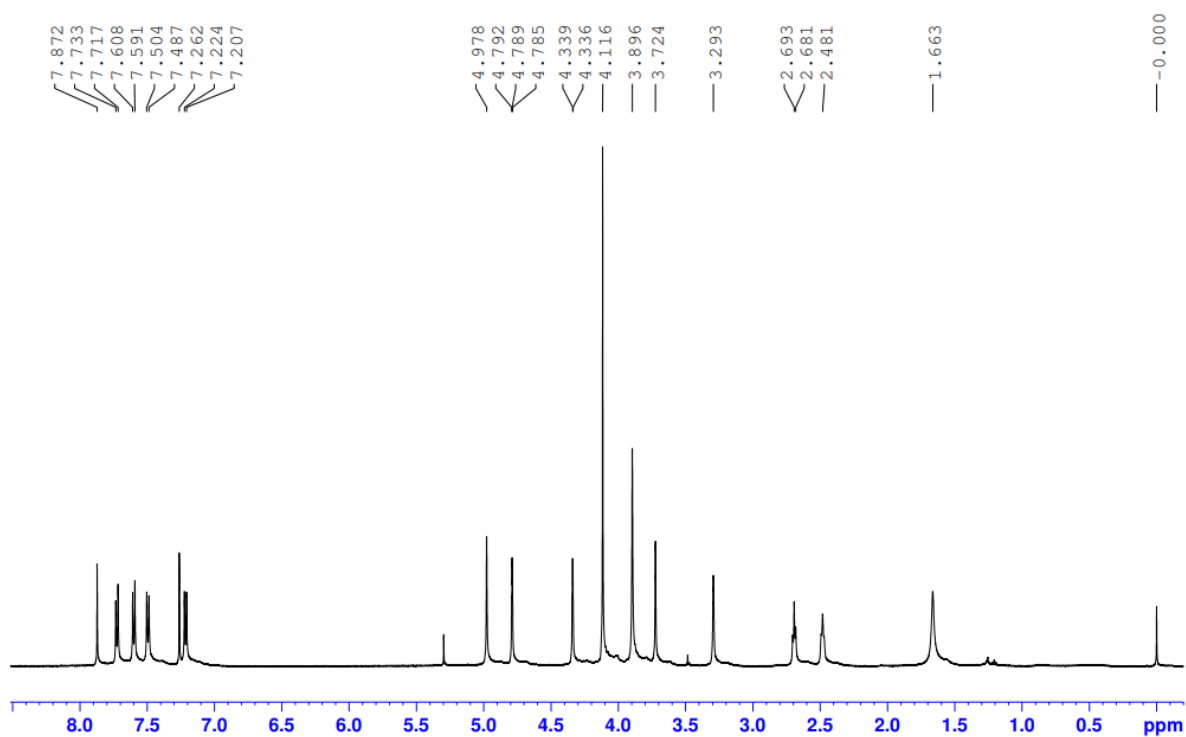

**<sup>1</sup>H-NMR of 12b**

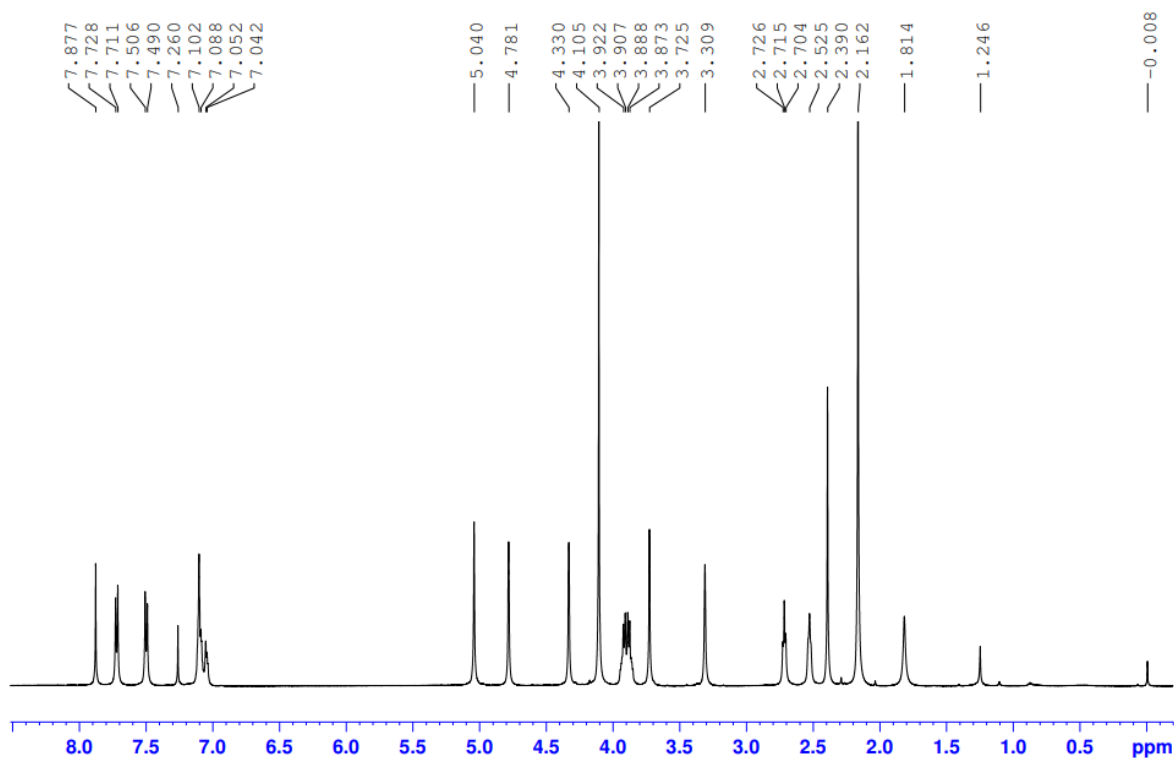

### $^{13}\text{C}$ -NMR of 12b

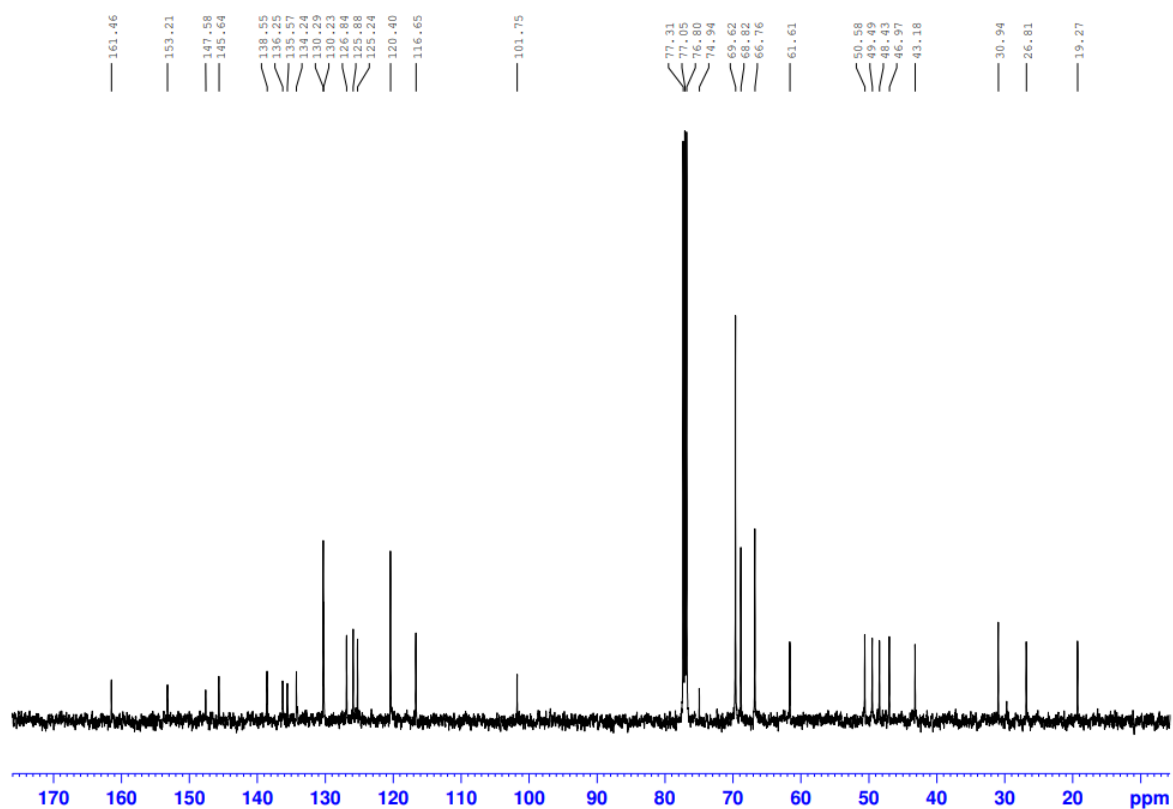

### $^1\text{H}$ -NMR of 13

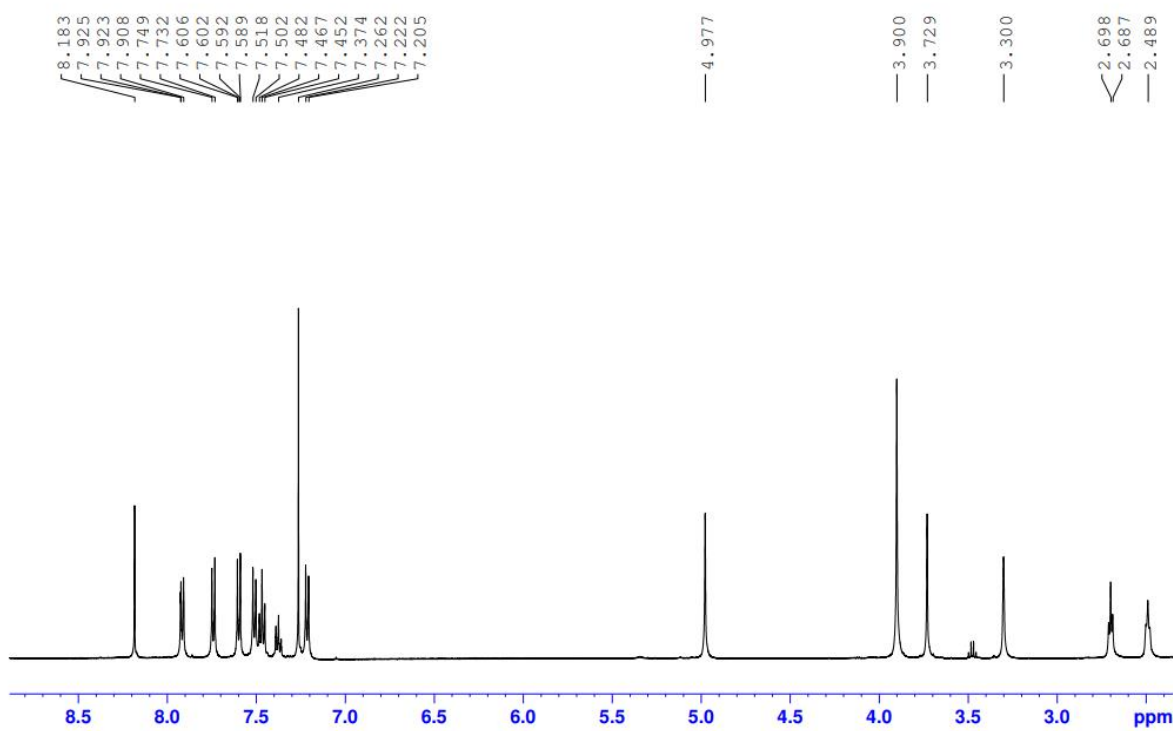

### <sup>1</sup>H-NMR of 16a

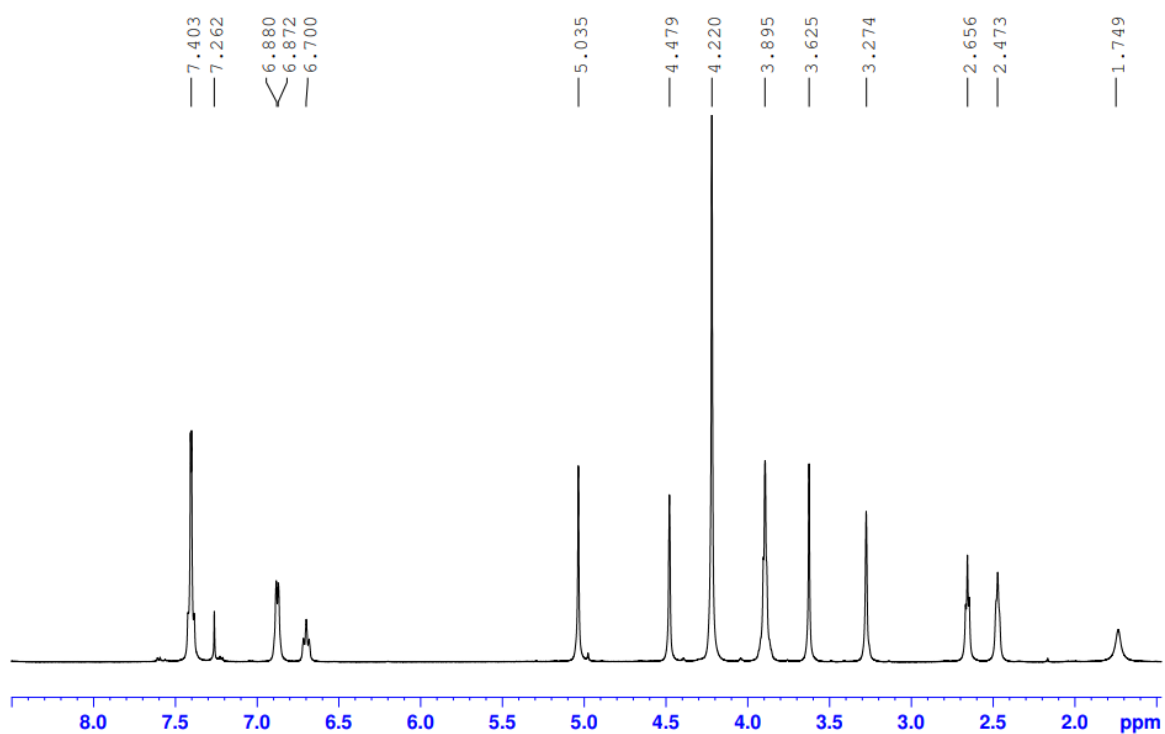

### <sup>13</sup>C-NMR of 16a

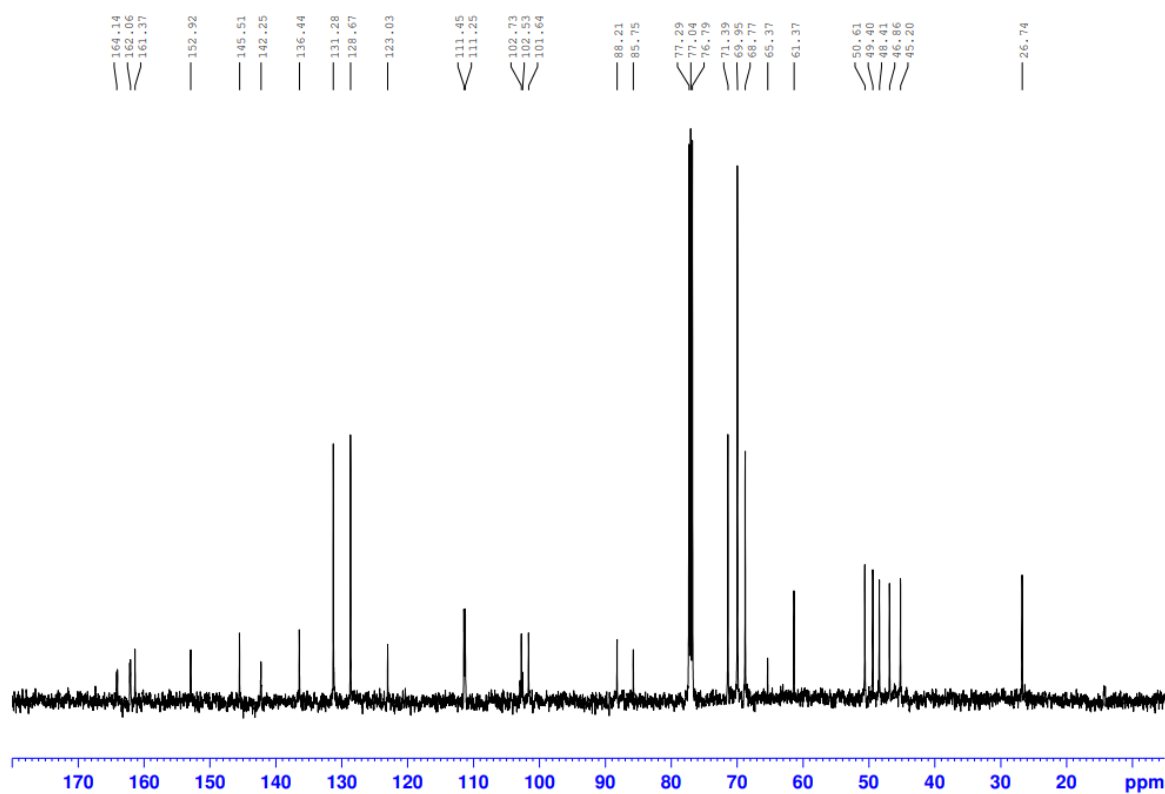

### $^1\text{H}$ -NMR of 16b

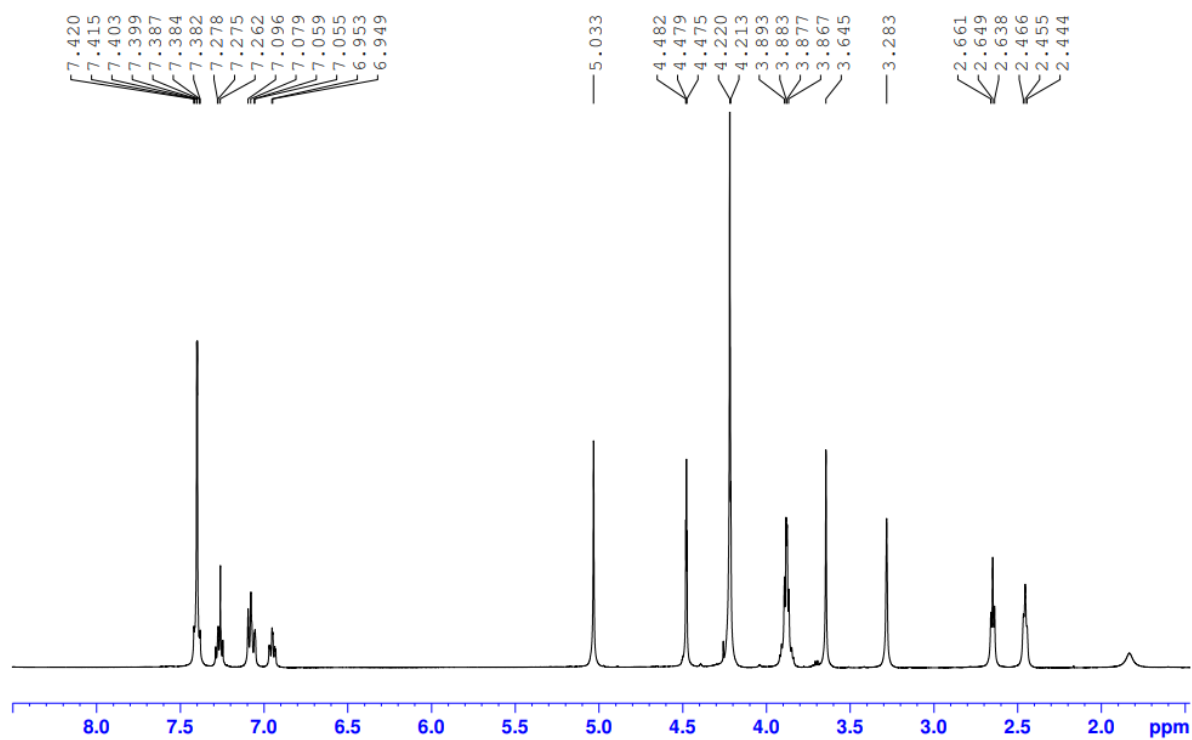

### $^{13}\text{C}$ -NMR of 16b

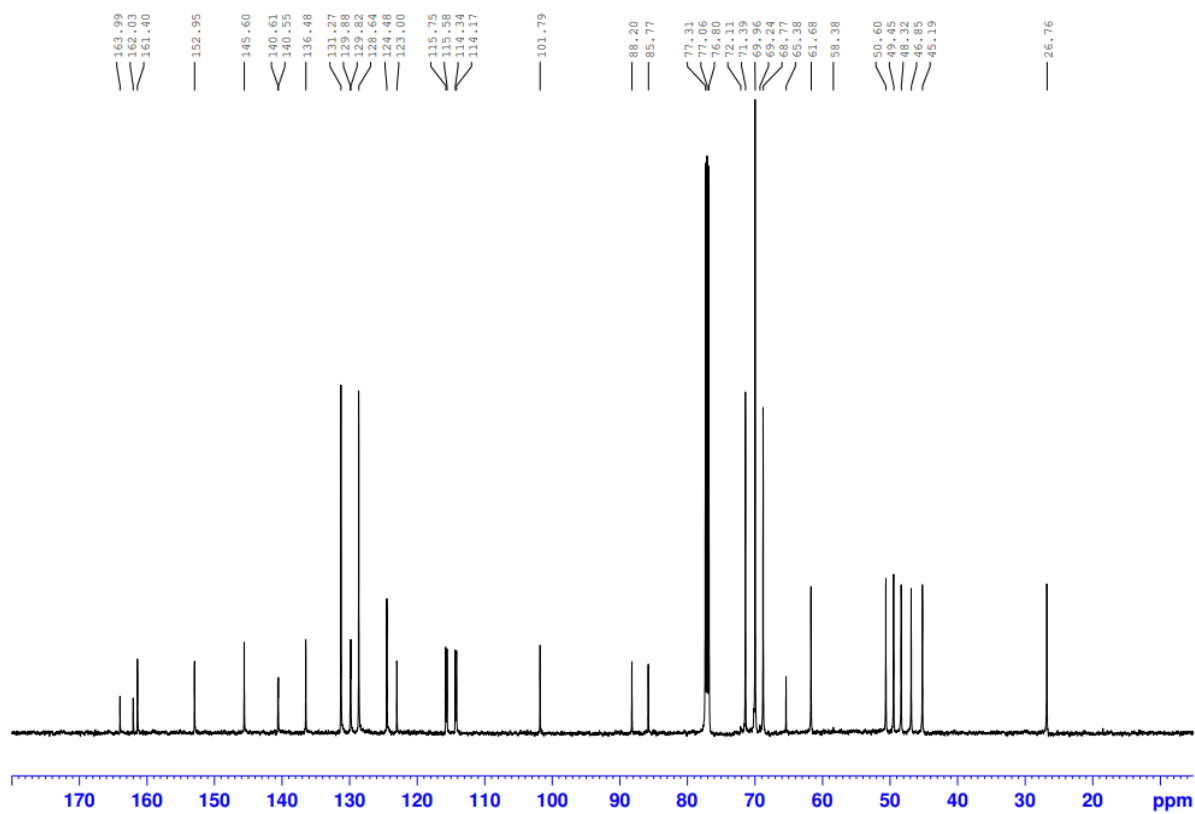

### $^1\text{H}$ -NMR of 16c

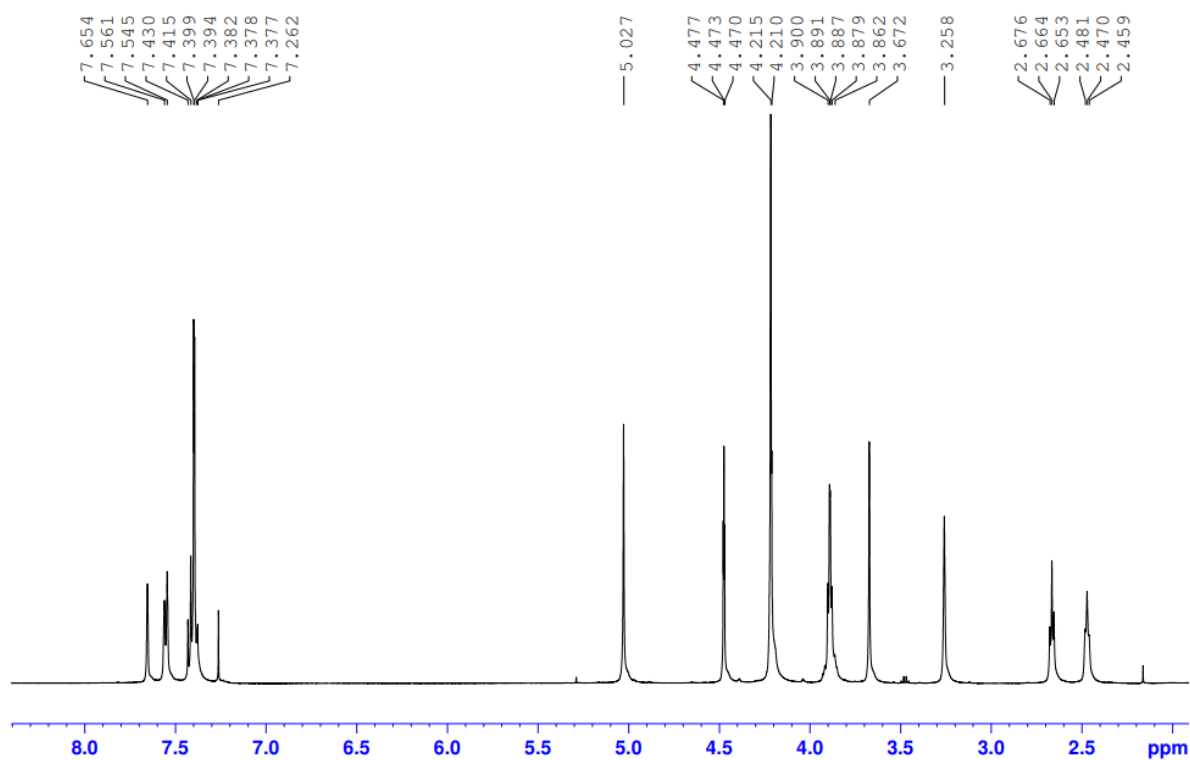

### $^{13}\text{C}$ -NMR of 16c

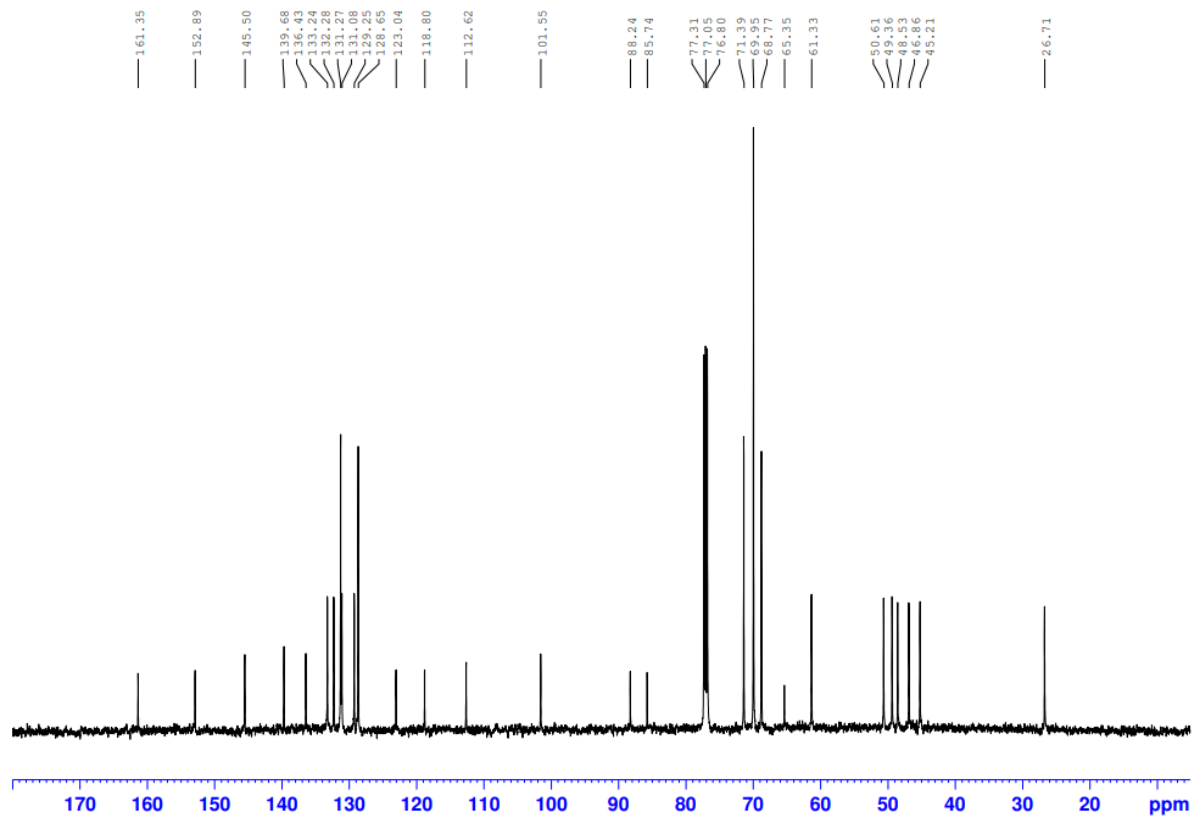

### $^1\text{H}$ -NMR of 16d

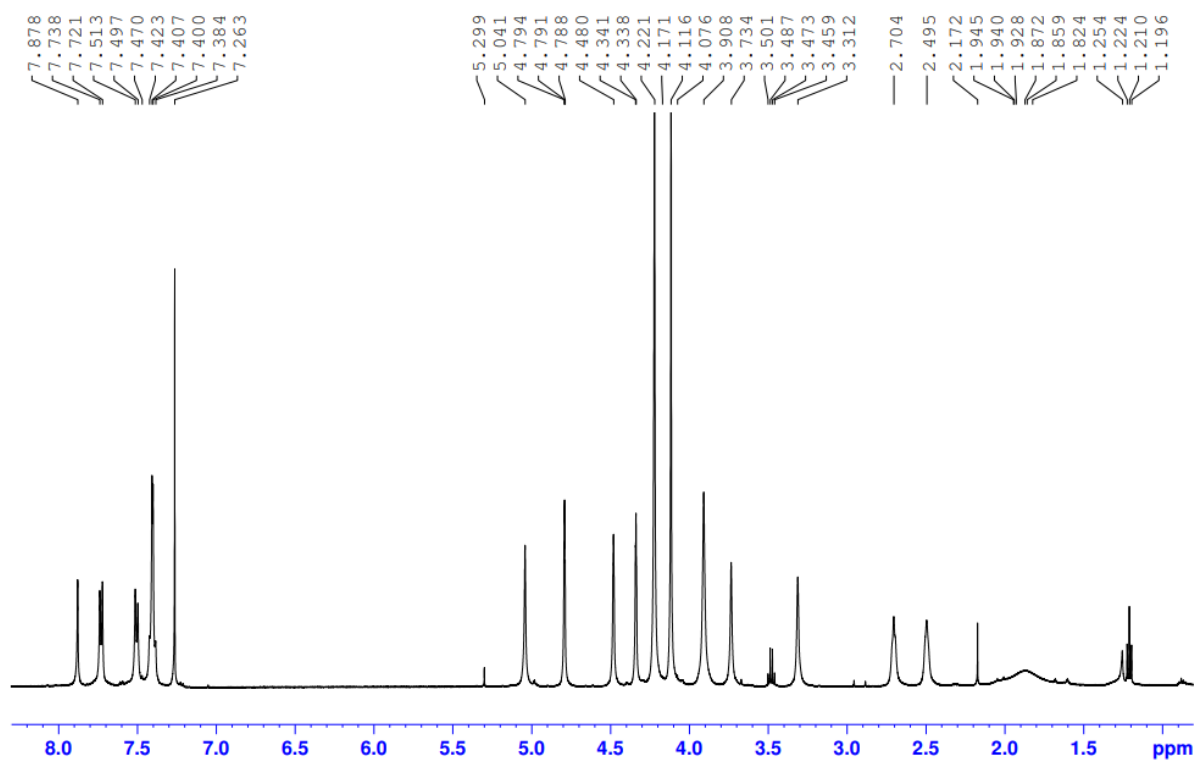

### $^{13}\text{C}$ -NMR of 16d

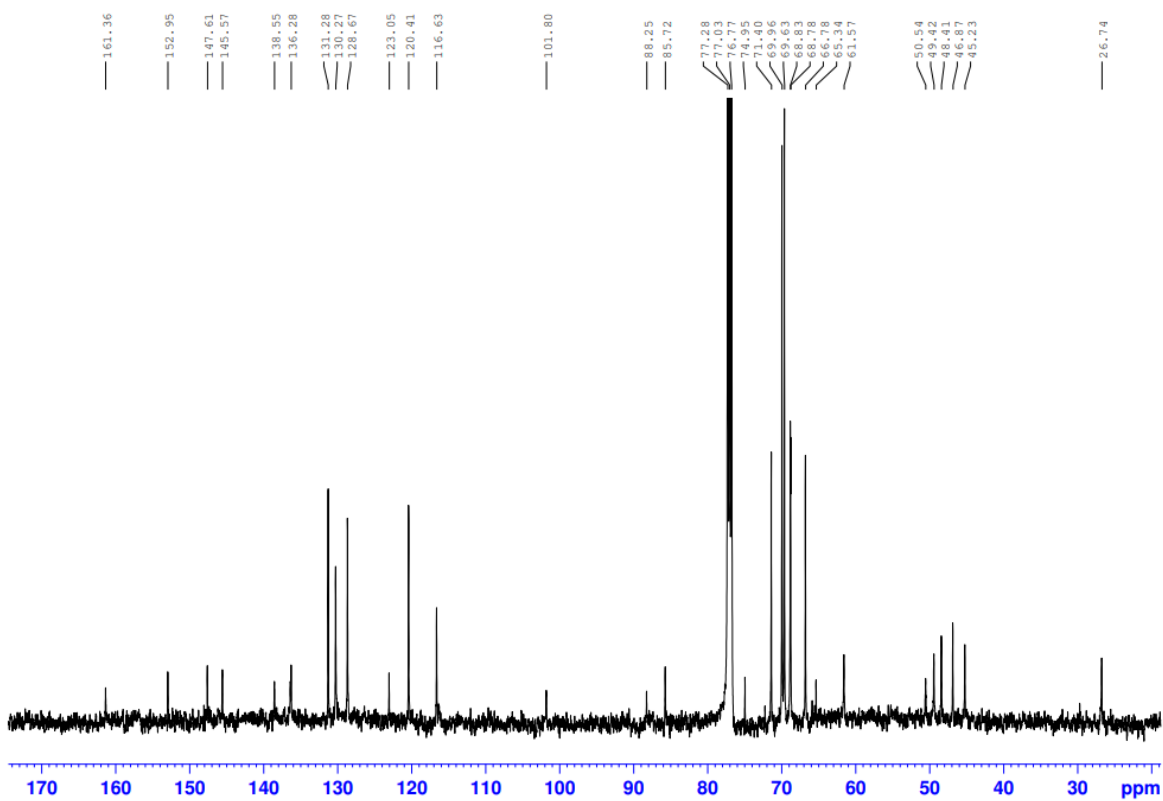

### <sup>1</sup>H-NMR of 17a

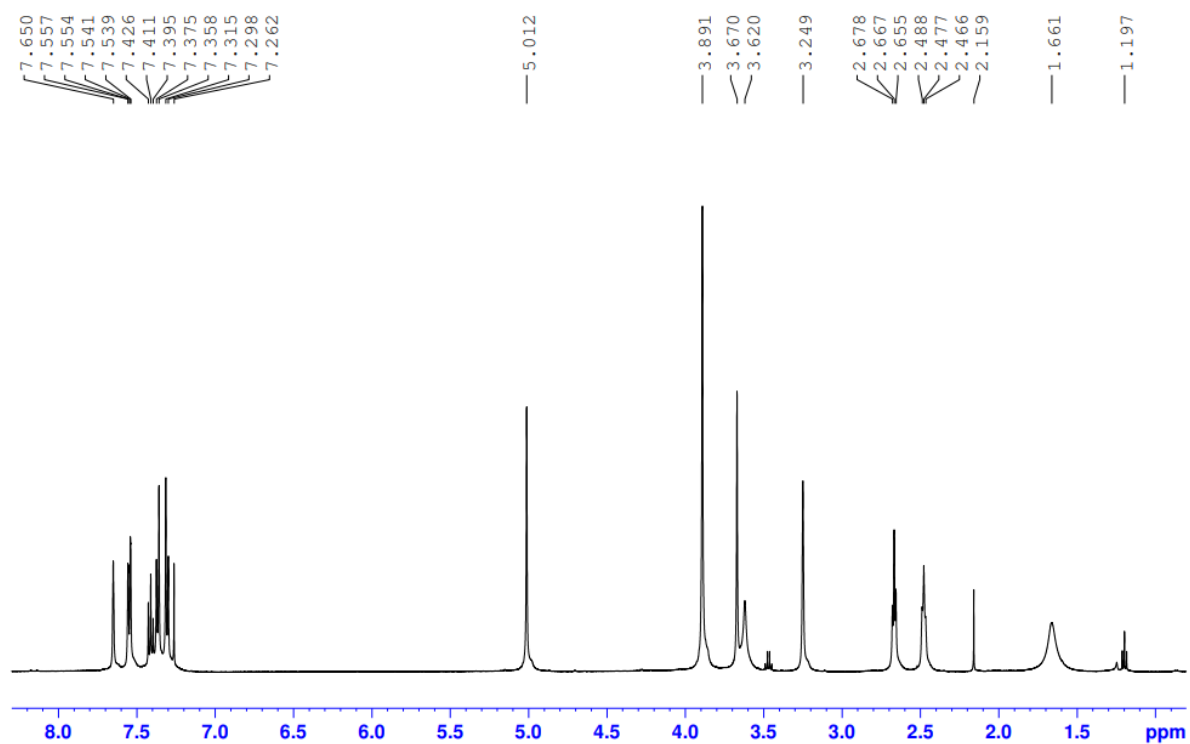

### <sup>13</sup>C-NMR of 17a

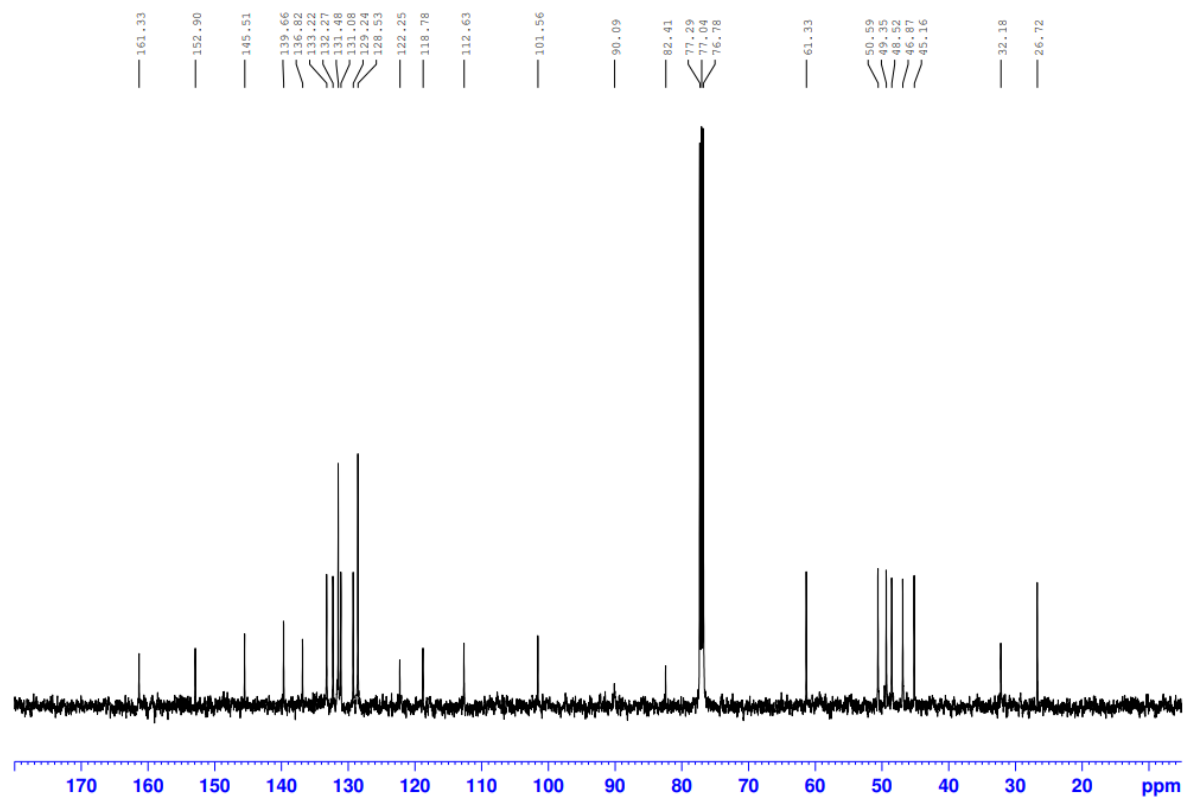



### <sup>1</sup>H-NMR of 17b

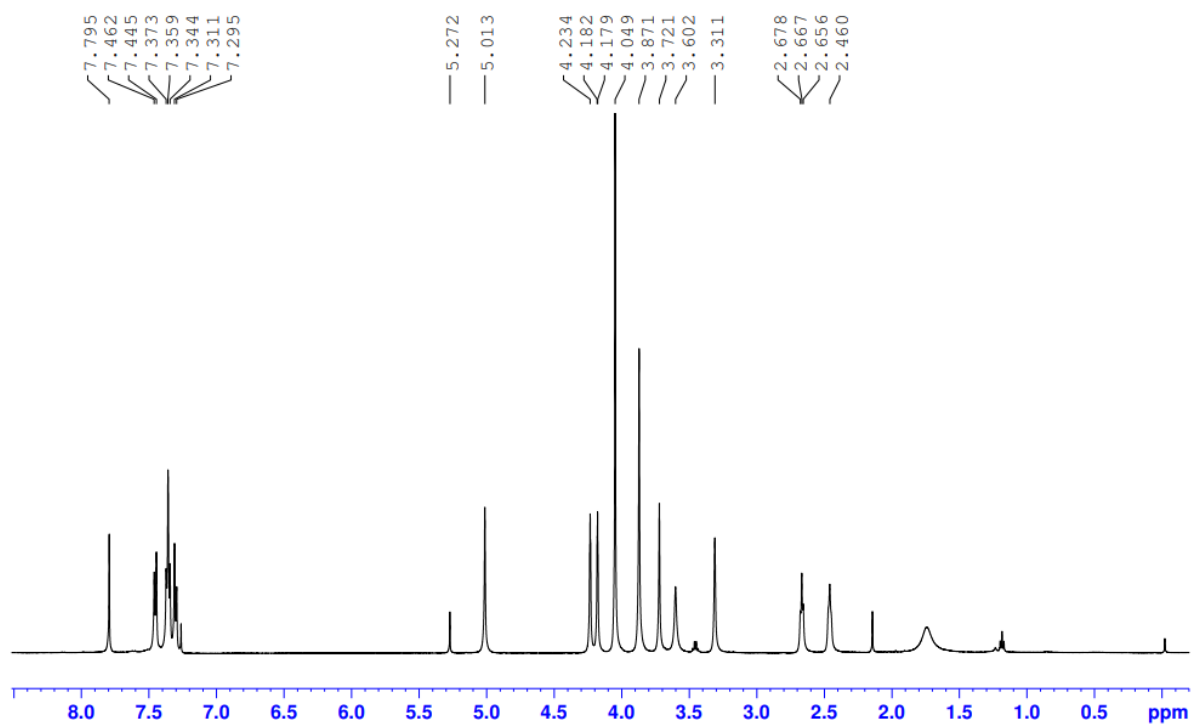

### <sup>13</sup>C-NMR of 17b

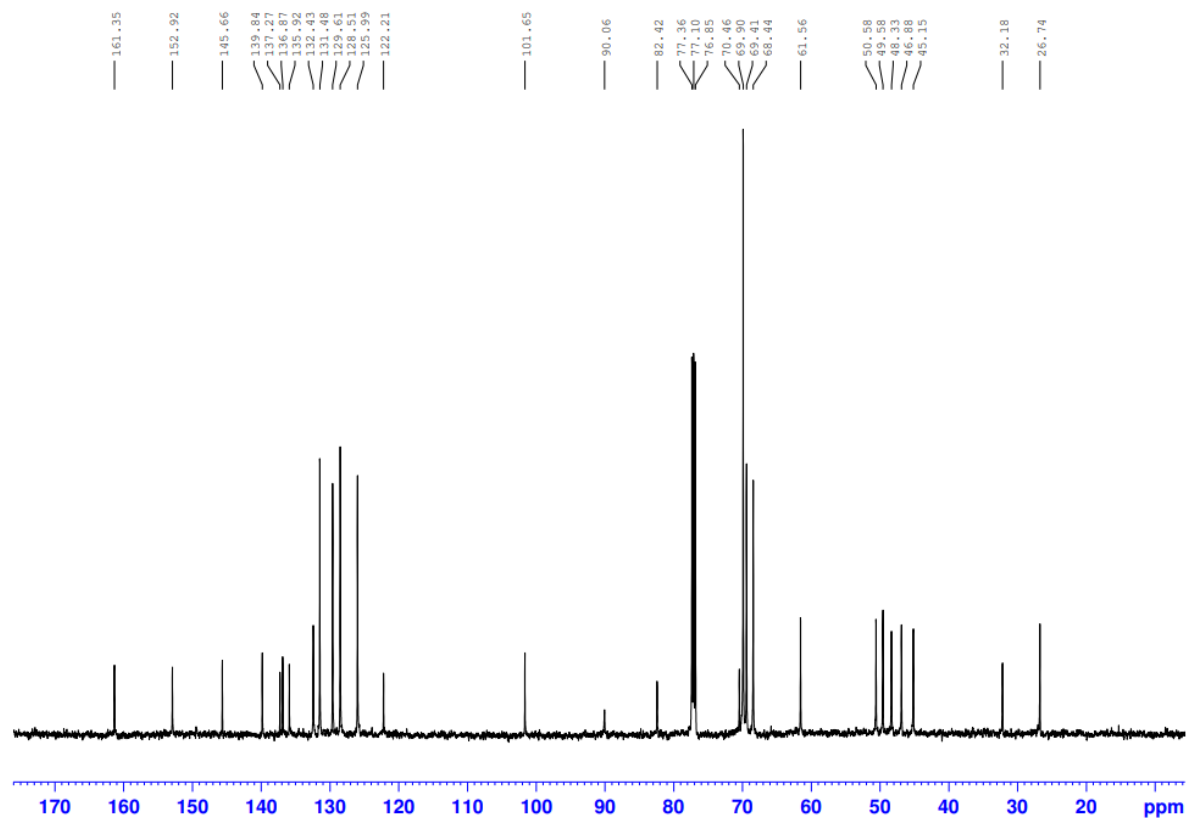

### $^1\text{H}$ -NMR of 17c

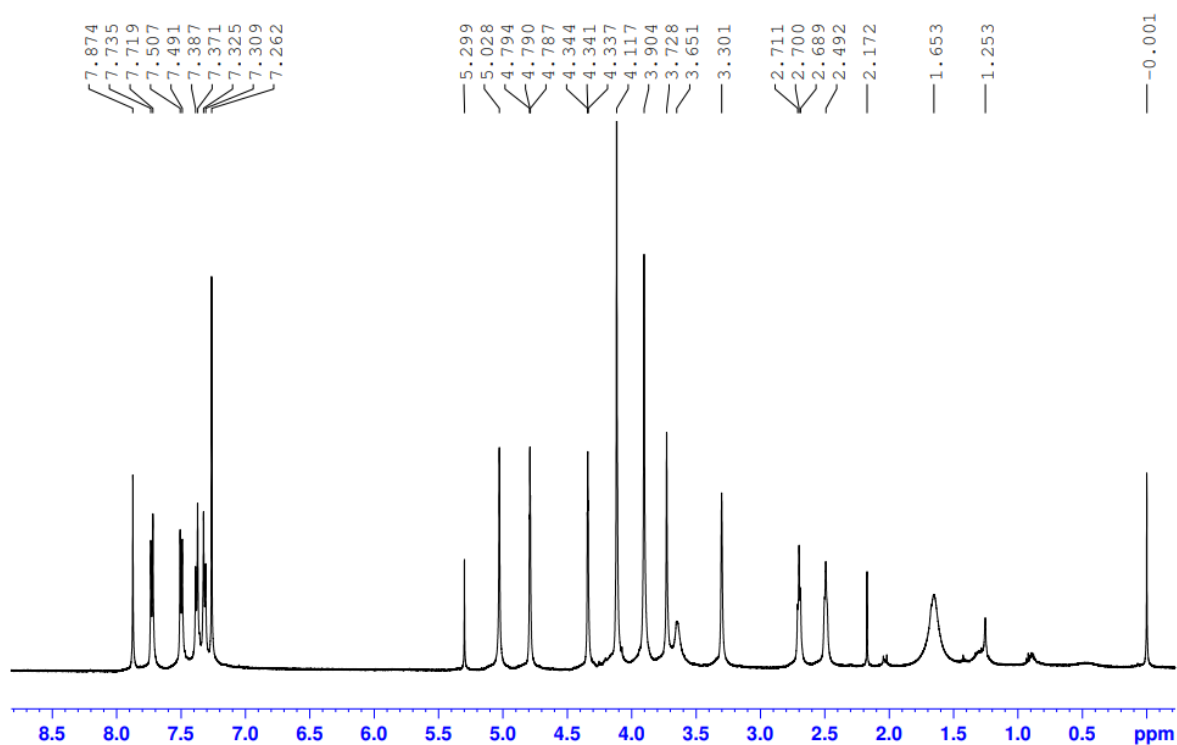

### $^{13}\text{C}$ -NMR of 17c

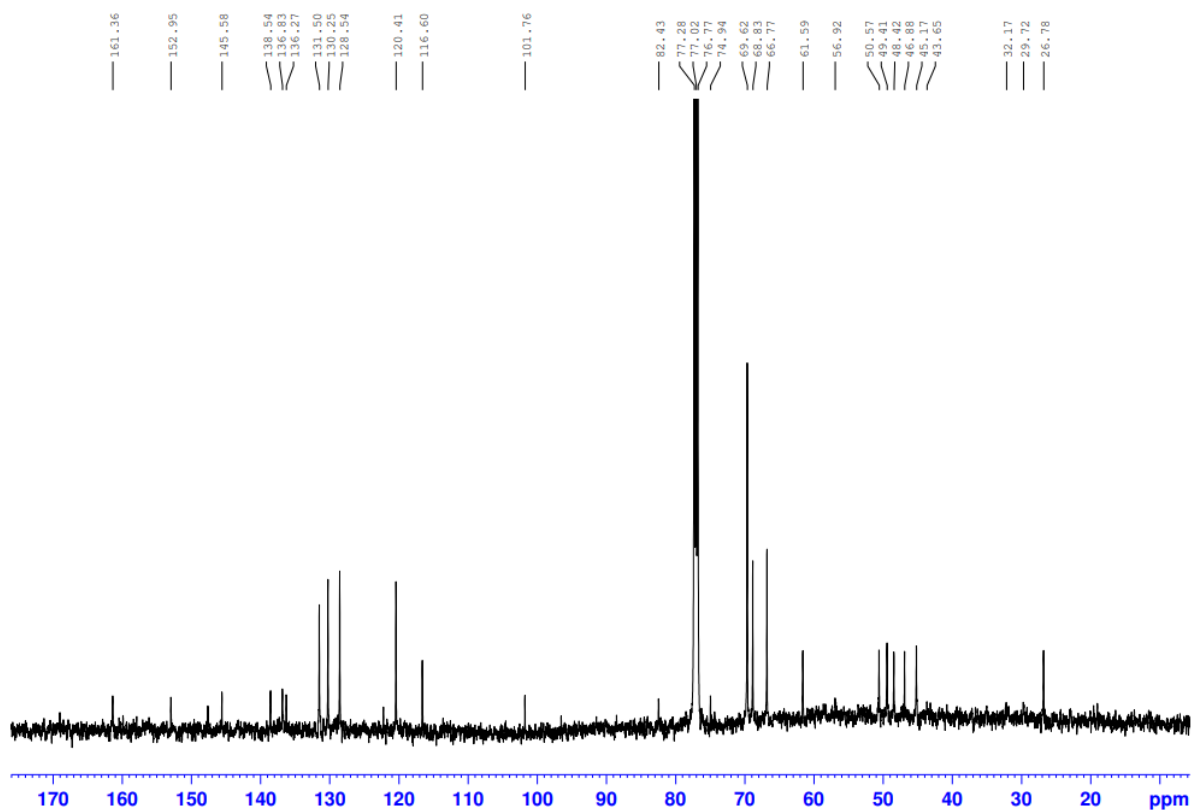

### <sup>1</sup>H-NMR of 17d

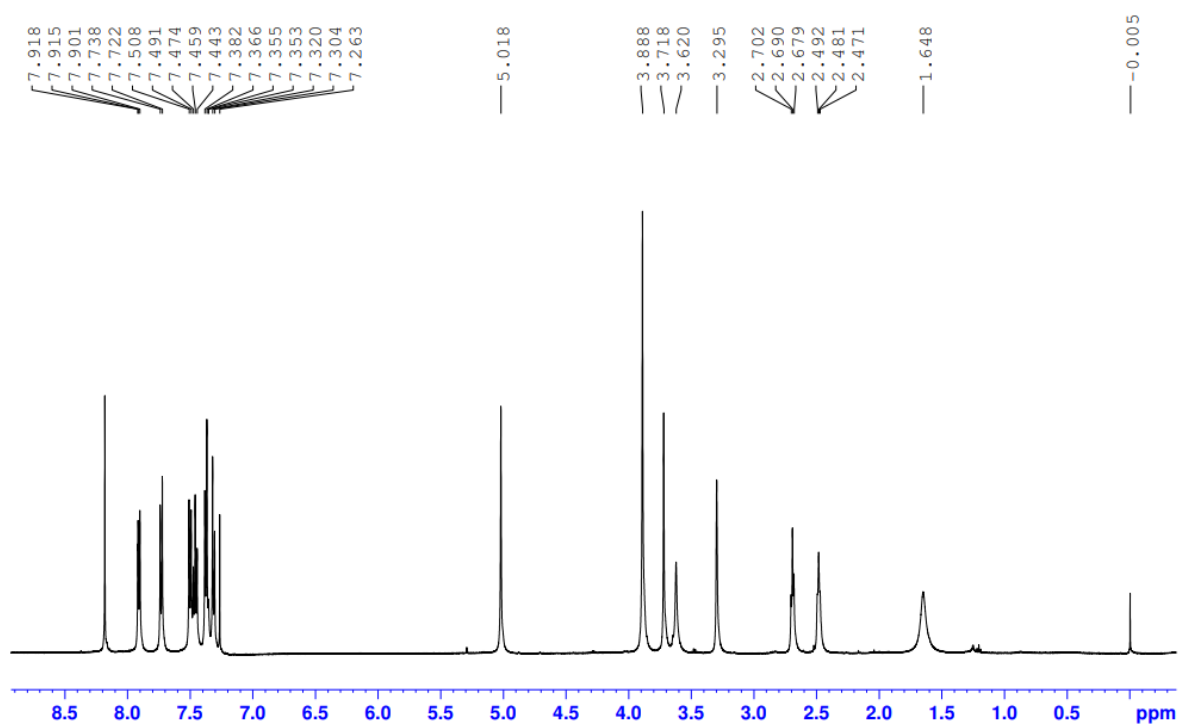

### <sup>13</sup>C-NMR of 17d

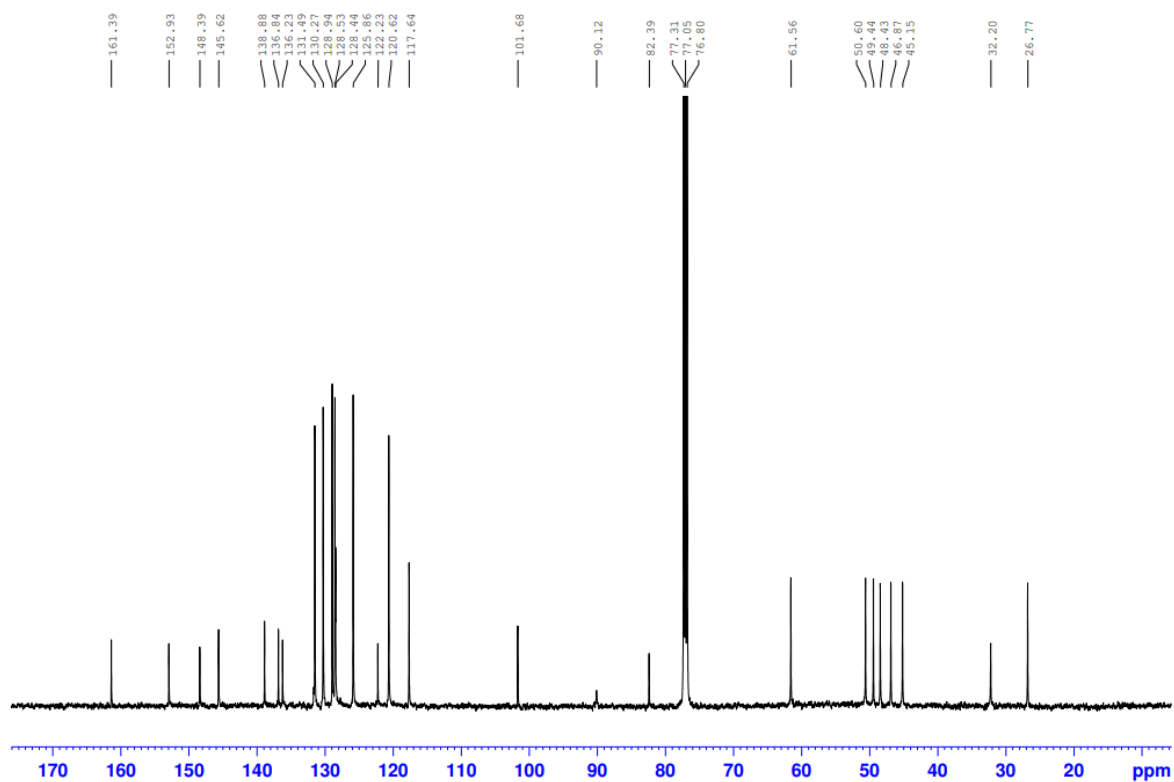

### <sup>1</sup>H-NMR of 18

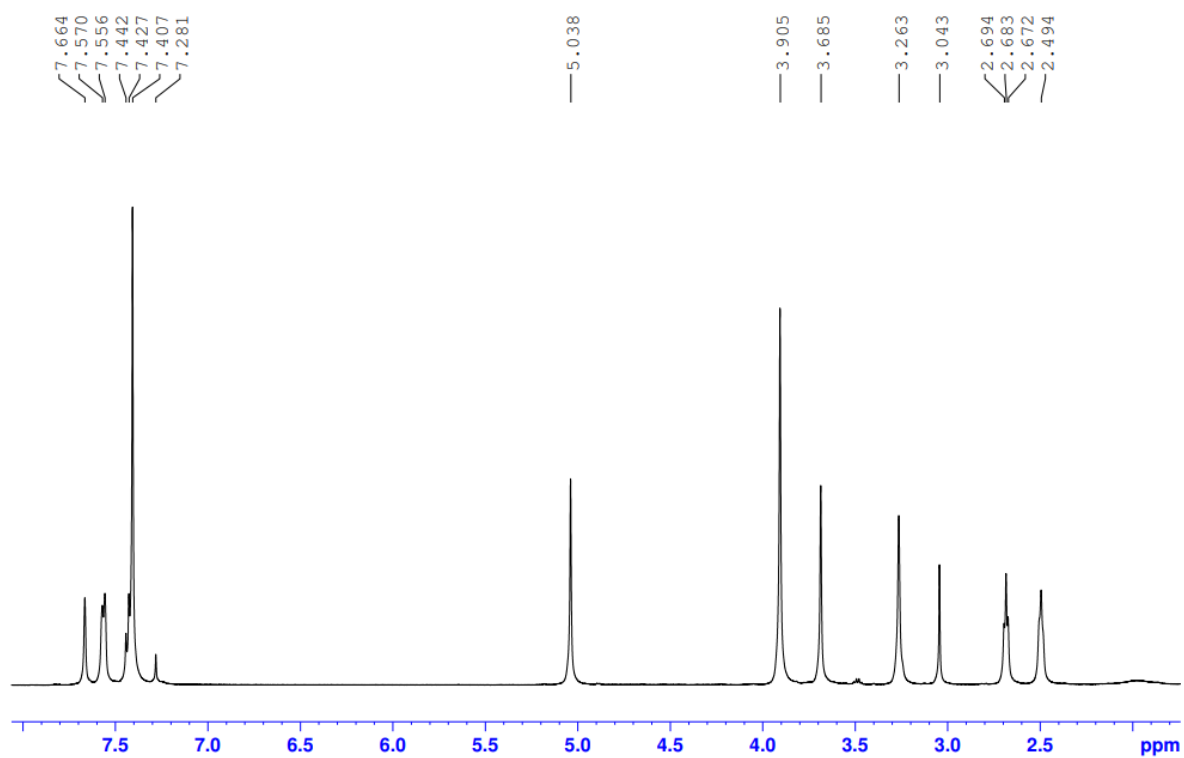

### <sup>13</sup>C-NMR of 18

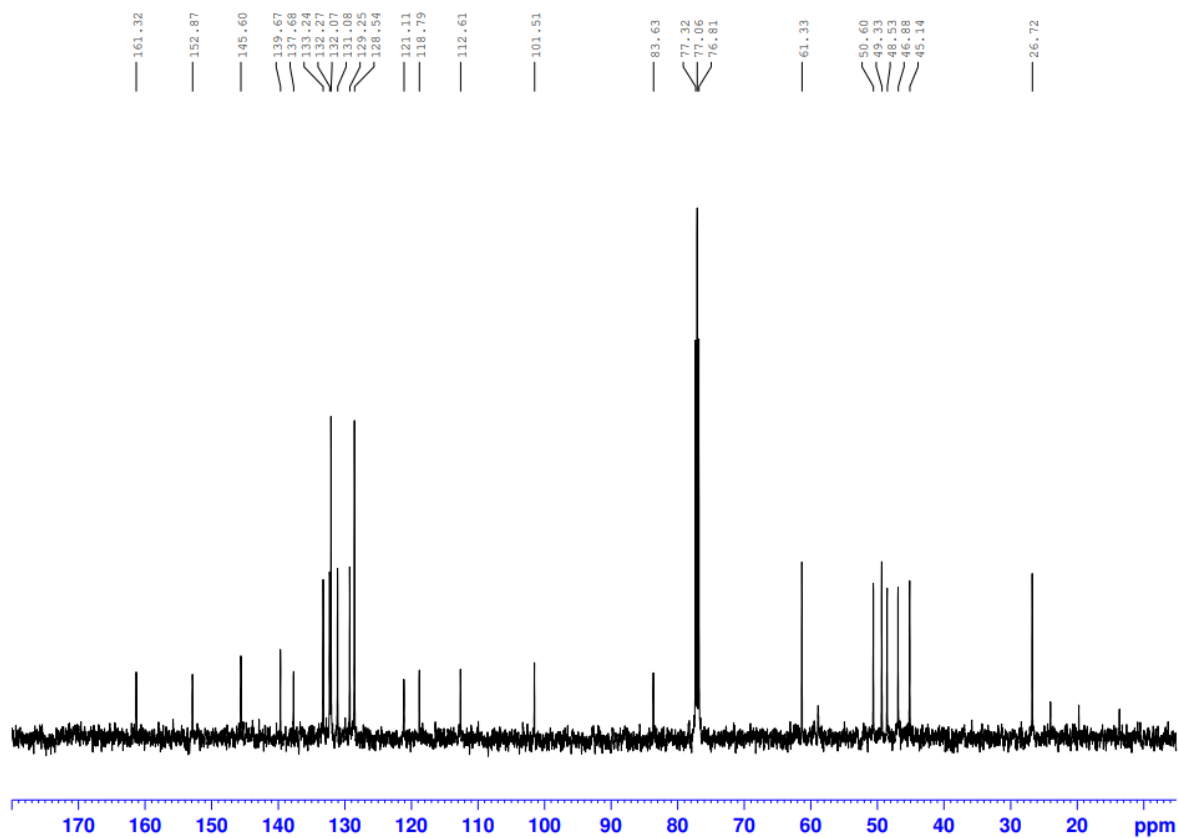

## S.4. Copies of the HRMS spectra

|    |                                                                                                              |
|----|--------------------------------------------------------------------------------------------------------------|
| 9a | $m/z$ calc for $[C_{35}H_{32}FFeN_7O]^+$ : 641.1996<br>$[M - e^-]^+$ ; found: 641.1984. mass error: 1.87 ppm |
|----|--------------------------------------------------------------------------------------------------------------|

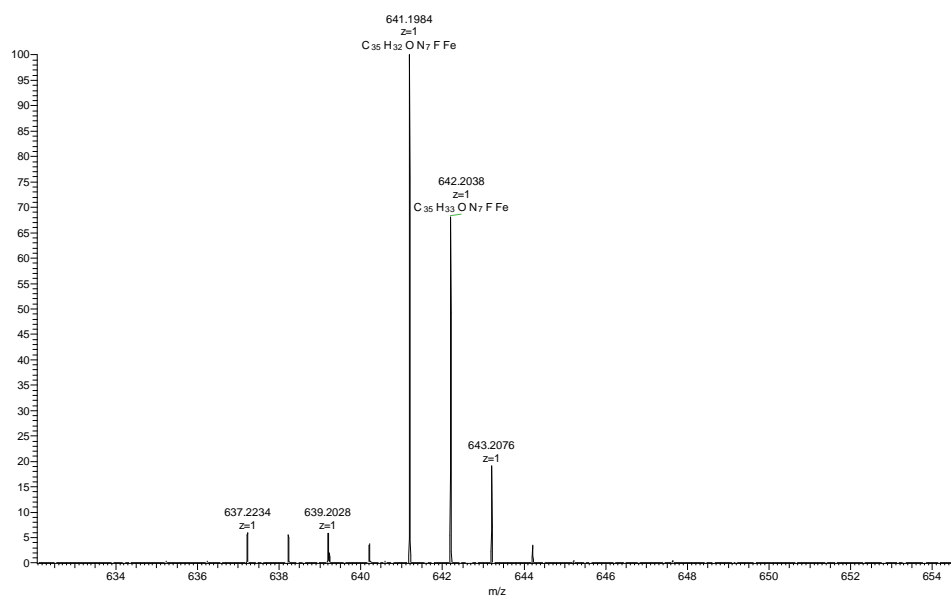

|    |                                                                                                                |
|----|----------------------------------------------------------------------------------------------------------------|
| 9b | $m/z$ calc for $[C_{35}H_{31}F_2FeN_7OH]^+$ : 660.1980<br>$[M + H]^+$ ; found: 660.1953. mass error: 4.095 ppm |
|----|----------------------------------------------------------------------------------------------------------------|

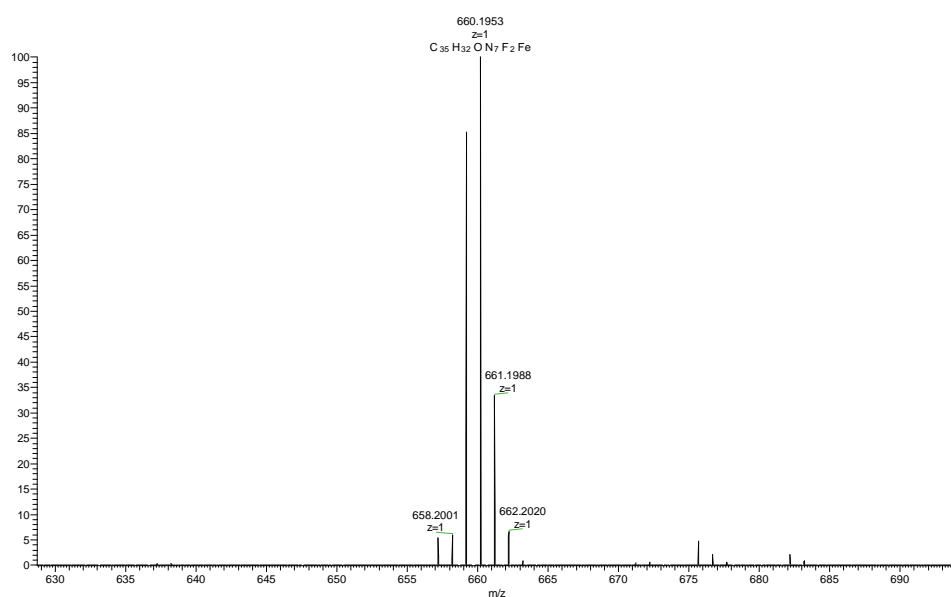

|     |                                                                                                            |
|-----|------------------------------------------------------------------------------------------------------------|
| 10a | $m/z$ calc for $[C_{35}H_{33}FFeN_7O]^+$ : 642.2075<br>$[M + H]^+$ ; found: 642.2058. mass error: 2.57 ppm |
|-----|------------------------------------------------------------------------------------------------------------|

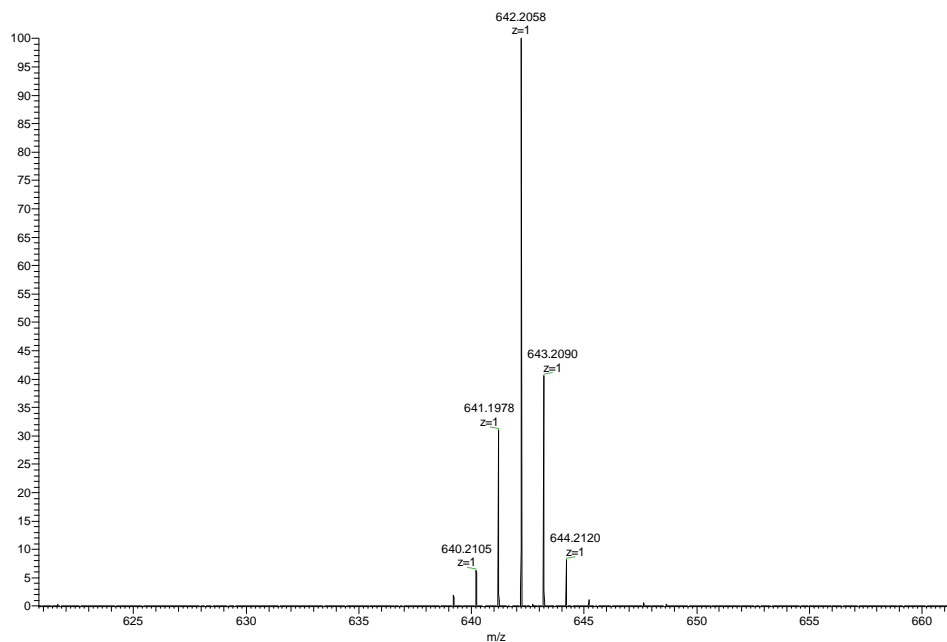

|     |                                                                                                                     |
|-----|---------------------------------------------------------------------------------------------------------------------|
| 10b | $m/z$ calc for $[C_{35}H_{32}F_2FeN_7O]^{2+}$ : 330.6027<br>$[M + 2H]^{2+}$ ; found: 330.6019. mass error: 2.28 ppm |
|-----|---------------------------------------------------------------------------------------------------------------------|

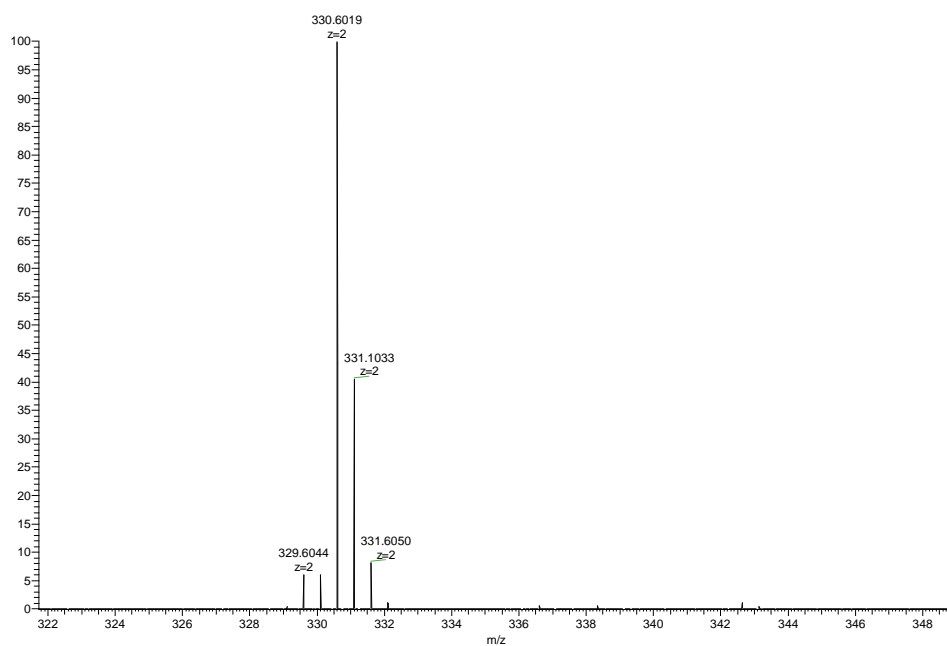

11

 $m/z$  calc for  $[\text{C}_{35}\text{H}_{33}\text{FeIN}_7\text{O}]^+$ : 750.1135 $[\text{M} + \text{H}]^+$ ; found: 750.1118. mass error: 2.29 ppm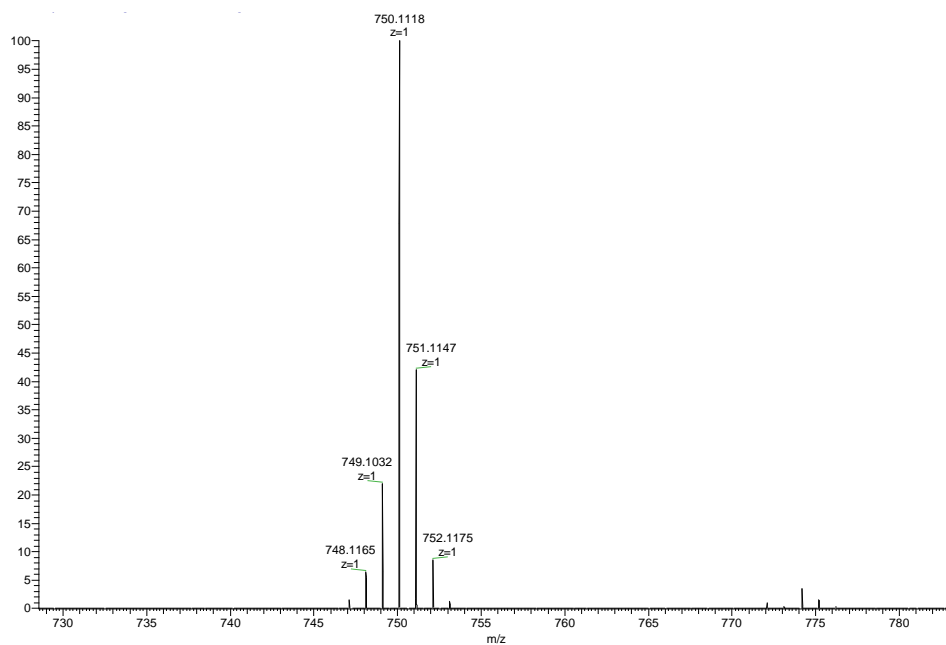

12a

 $m/z$  calc for  $[\text{C}_{35}\text{H}_{33}\text{FeIN}_7\text{O}]^+$ : 750.1135 $[\text{M} + \text{H}]^+$ ; found: 750.1112. mass error: 3.09 ppm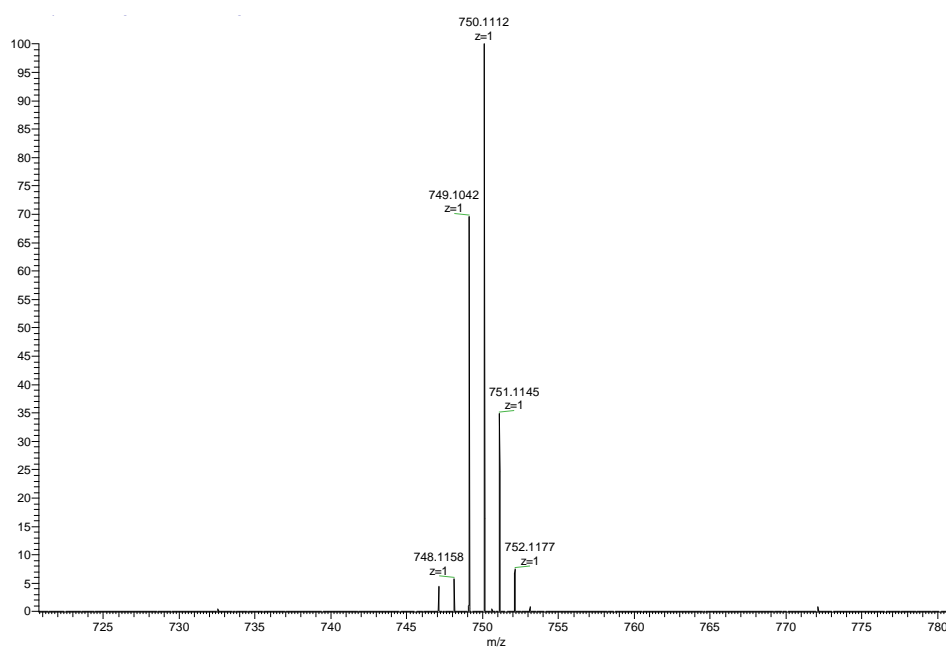

12b

$m/z$  calc for  $[C_{36}H_{36}FeN_7O]^+$ : 638.2325

$[M+H]^+$ ; found: 638.2305; mass error: 3.17.

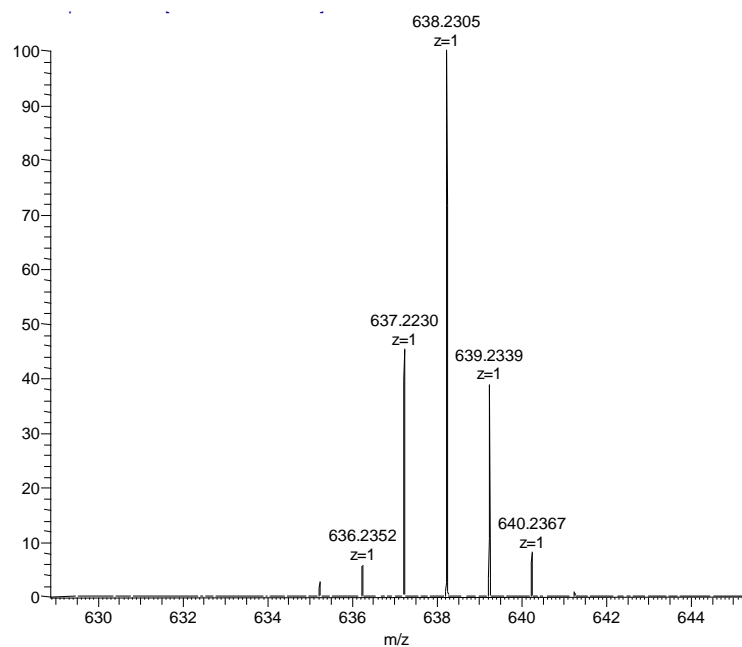

13

$m/z$  calc for  $[C_{31}H_{29}IN_7O]^+$ : 642.1473

$[M+H]^+$ ; found: 642.1455. mass error: 2.78 ppm.

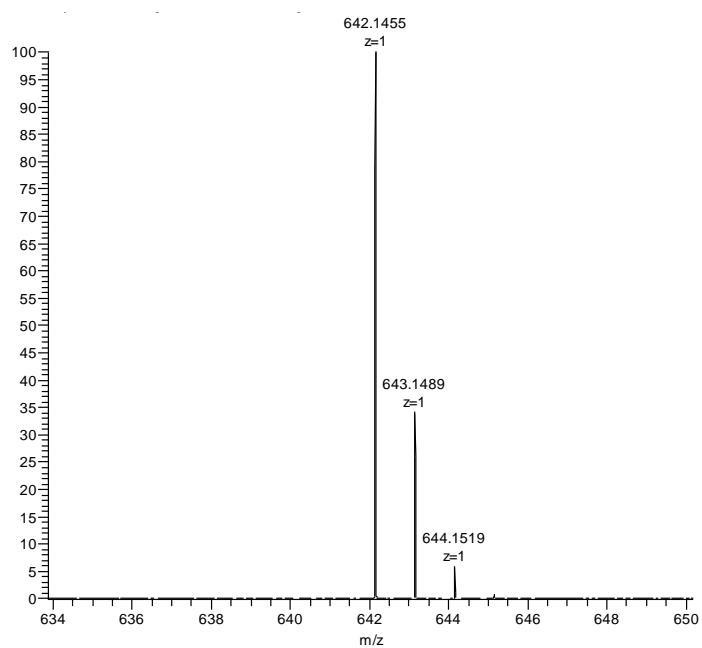



**16a**

$m/z$  calc for  $[\text{C}_{35}\text{H}_{32}\text{FeN}_4\text{O}]^+$ : 599.1904

$[\text{M} + \text{H}]^+$ ; found: 599.1888. mass error: 2.67 ppm

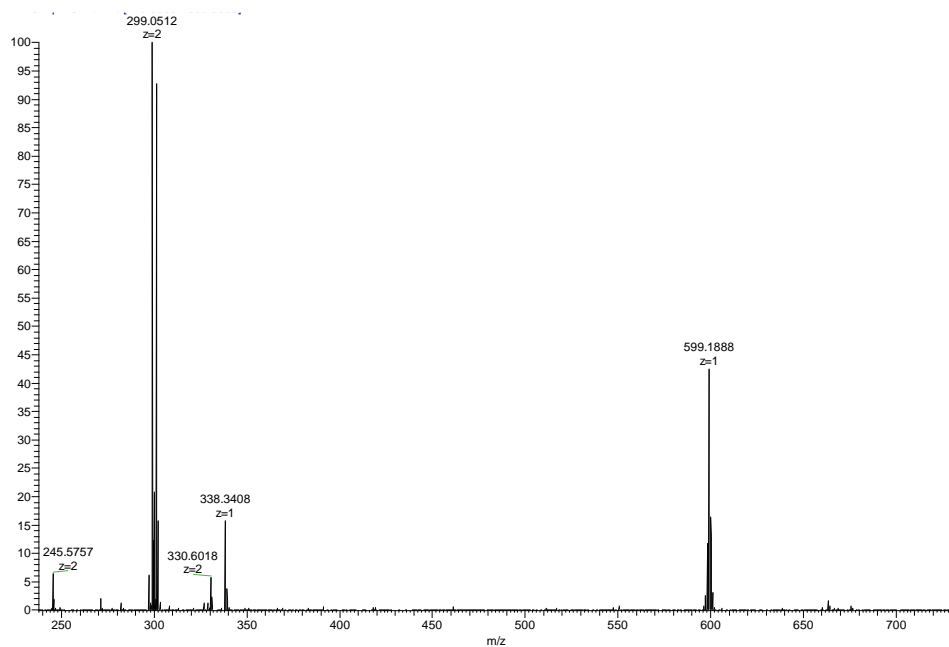

**16c**

$m/z$  calc for  $[\text{C}_{36}\text{H}_{32}\text{FeN}_5\text{O}]^+$ : 606.1951

$[\text{M} + \text{H}]^+$ ; found: 606.1930. mass error: 3.42 ppm

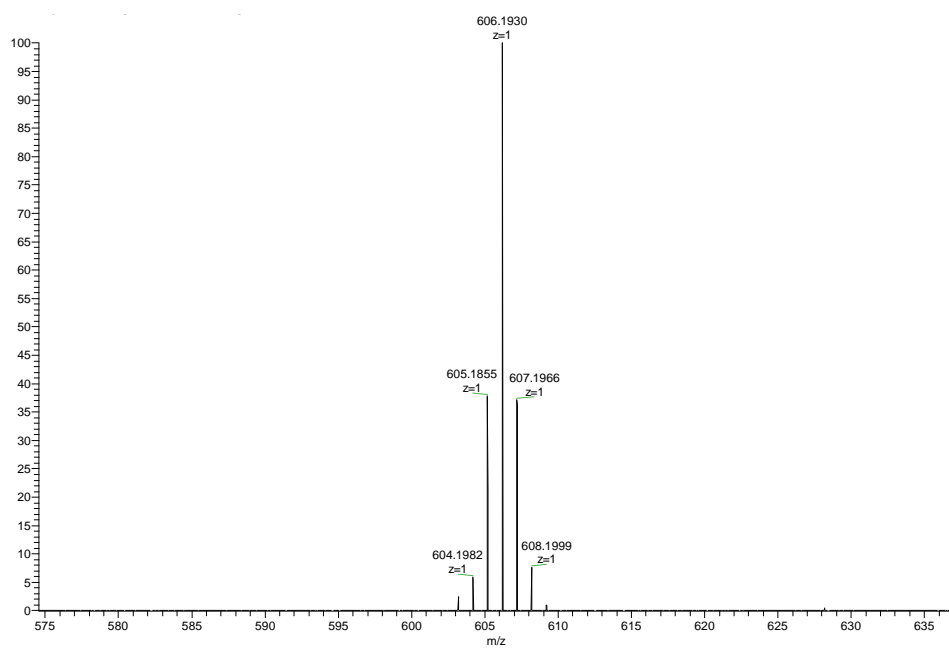

|            |                                                                                                            |
|------------|------------------------------------------------------------------------------------------------------------|
| <b>16d</b> | $m/z$ calc for $[C_{47}H_{42}Fe_2N_7O]^+$ : 832.2144<br>$[M+H]^+$ ; found: 832.2120; mass error: 2.90 ppm. |
|------------|------------------------------------------------------------------------------------------------------------|

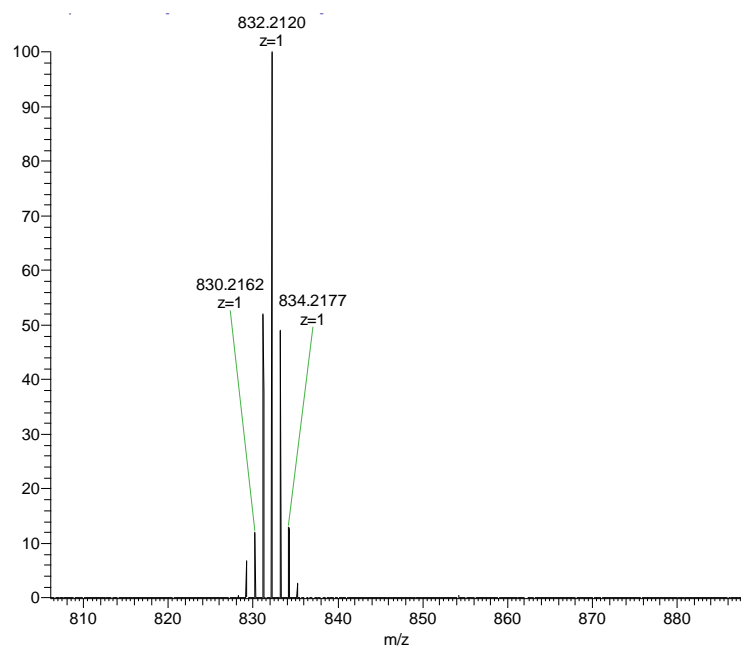

|            |                                                                                                        |
|------------|--------------------------------------------------------------------------------------------------------|
| <b>17a</b> | $m/z$ calc for $[C_{27}H_{27}N_6O]^+$ : 451.2241<br>$[M+H]^+$ ; found: 451.2234. mass error: 1.52 ppm. |
|------------|--------------------------------------------------------------------------------------------------------|

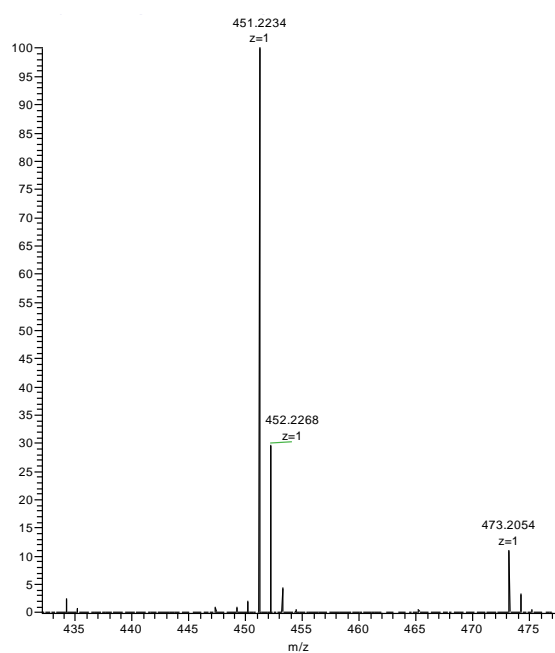

|     |                                                                                                        |
|-----|--------------------------------------------------------------------------------------------------------|
| 17b | $m/z$ calc for $[C_{38}H_{37}FeN_8O]^+$ : 677.2434<br>$[M+H]^+$ found: 677.2402. mass error: 4.76 ppm. |
|-----|--------------------------------------------------------------------------------------------------------|

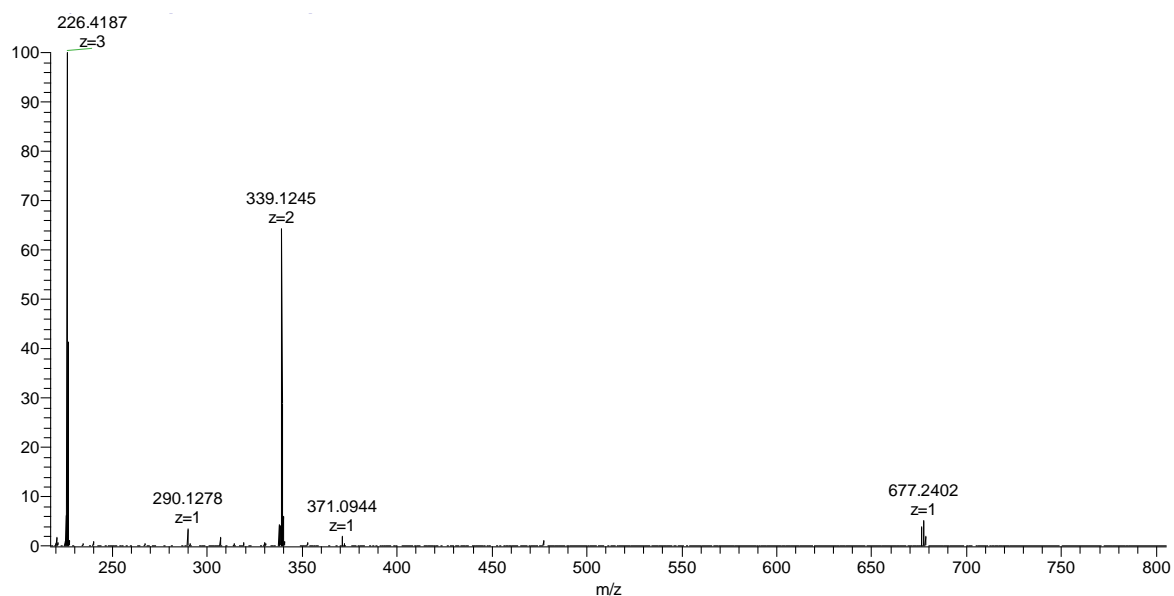

|     |                                                                                                        |
|-----|--------------------------------------------------------------------------------------------------------|
| 17c | $m/z$ calc for $[C_{38}H_{37}FeN_8O]^+$ : 677.2434<br>$[M+H]^+$ found: 677.2404. mass error: 4.46 ppm. |
|-----|--------------------------------------------------------------------------------------------------------|

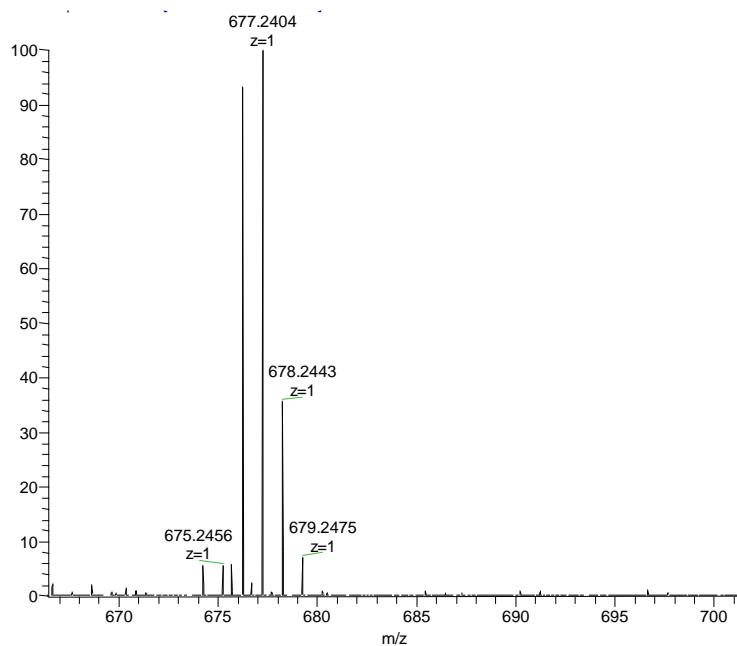

17d

$m/z$  calc for  $[C_{34}H_{33}N_8O]^+$ : 569.2772

$[M+H]^+$ ; found: 569.2765; mass error: 1.20 ppm.

274 #85-118 RT: 0.39-0.54 AV: 34 NL: 1.10E7  
T: FTMS + p ESI Full ms [240.0000-2000.0000]

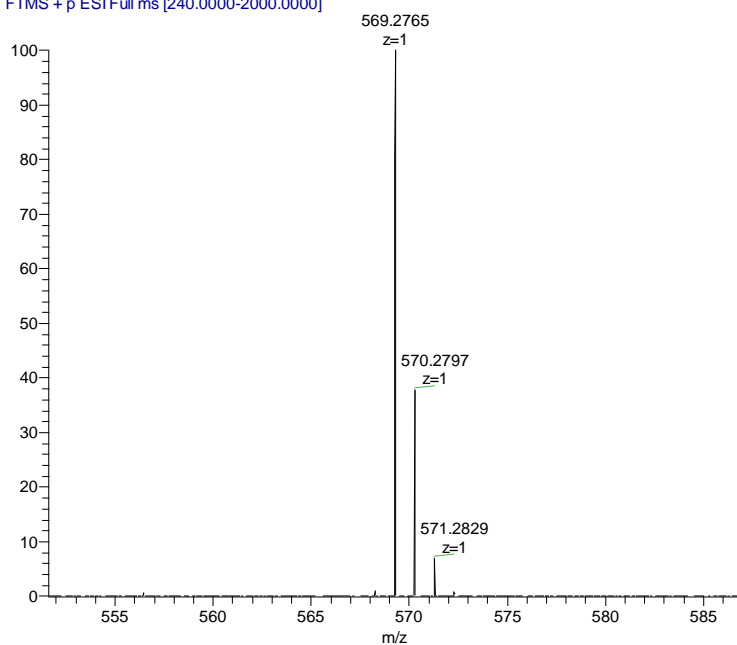

17e

$m/z$  calc for  $[C_{28}H_{29}N_8O]^+$ : 493.2459

$[M+H]^+$ ; found: 493.2451; mass error: 1.59 ppm.

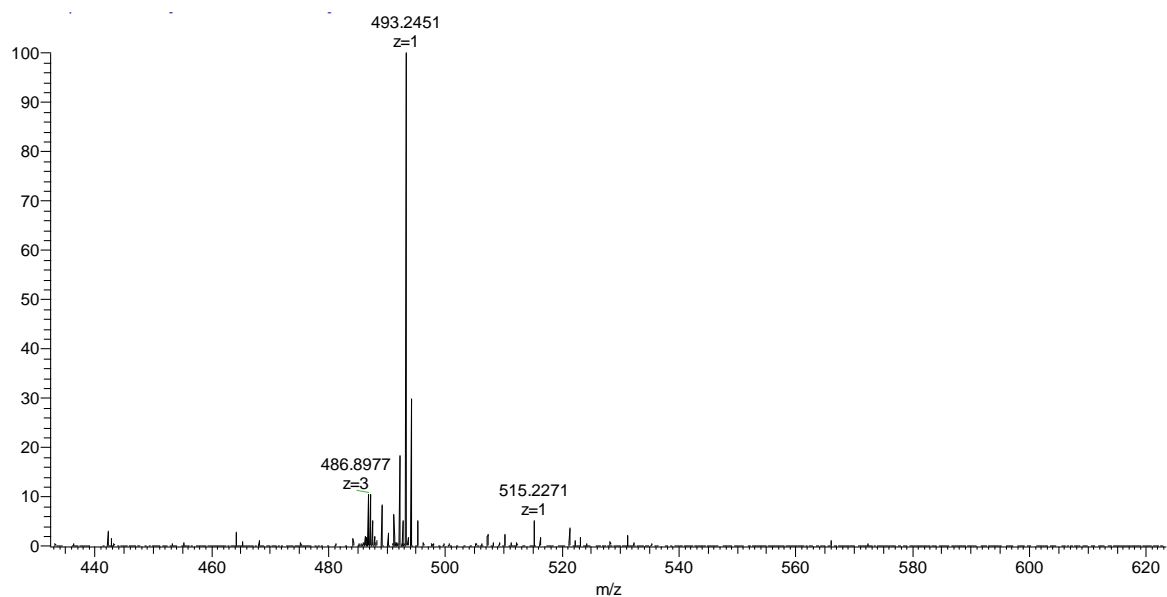

|            |                                                                                                          |
|------------|----------------------------------------------------------------------------------------------------------|
| <b>7bf</b> | $m/z$ calc for $[C_{23}H_{23}FIN_4O]^+$ : 517.0895<br>$[M+H]^+$ ; found: 517.0885; mass error: 1.96 ppm. |
|------------|----------------------------------------------------------------------------------------------------------|

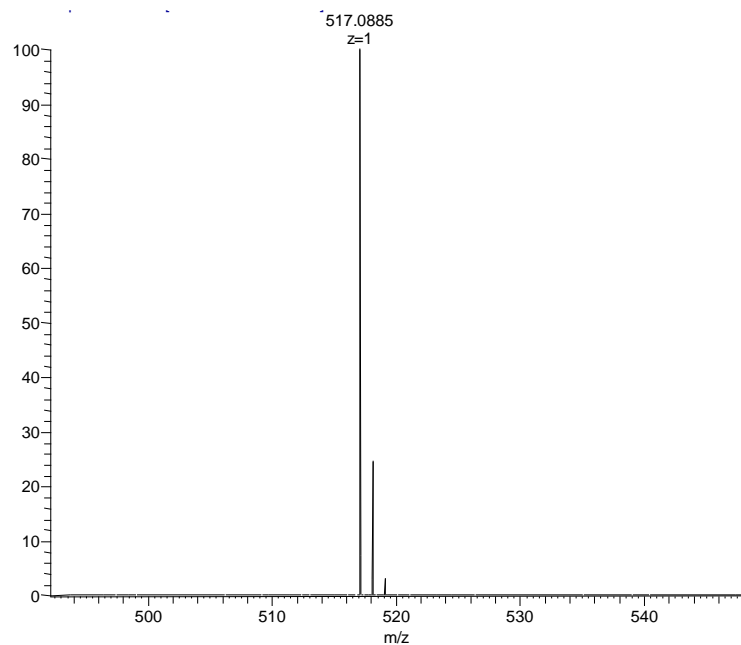

|            |                                                                                                         |
|------------|---------------------------------------------------------------------------------------------------------|
| <b>7bh</b> | $m/z$ calc for $[C_{23}H_{23}FN_7O]^+$ : 432.1943<br>$[M+H]^+$ ; found: 432.1936; mass error: 1.53 ppm. |
|------------|---------------------------------------------------------------------------------------------------------|

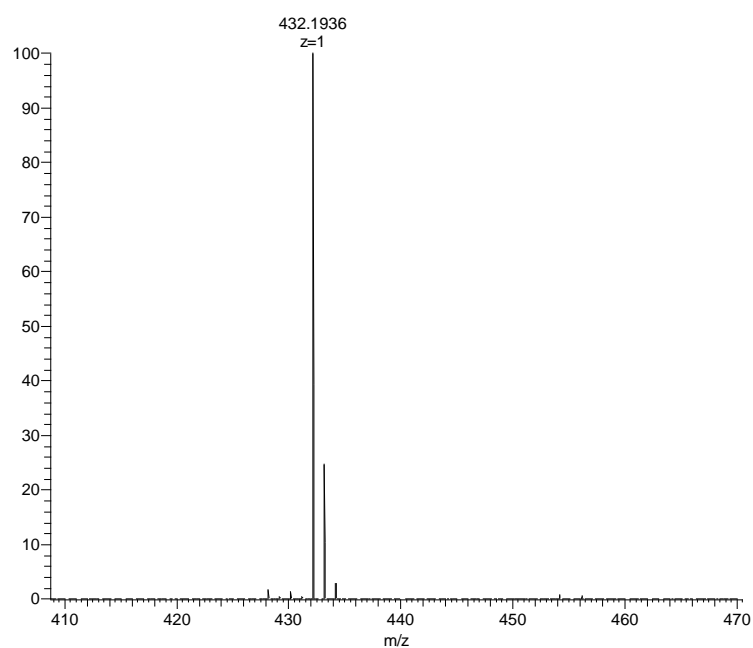

|            |                                                                                                          |
|------------|----------------------------------------------------------------------------------------------------------|
| <b>7ch</b> | $m/z$ calc. for $[C_{23}H_{22}F_2N_7O]^+$ : 450.1848 $[M+H]^+$<br>found: 450.1843; mass error: 1.20 ppm. |
|------------|----------------------------------------------------------------------------------------------------------|

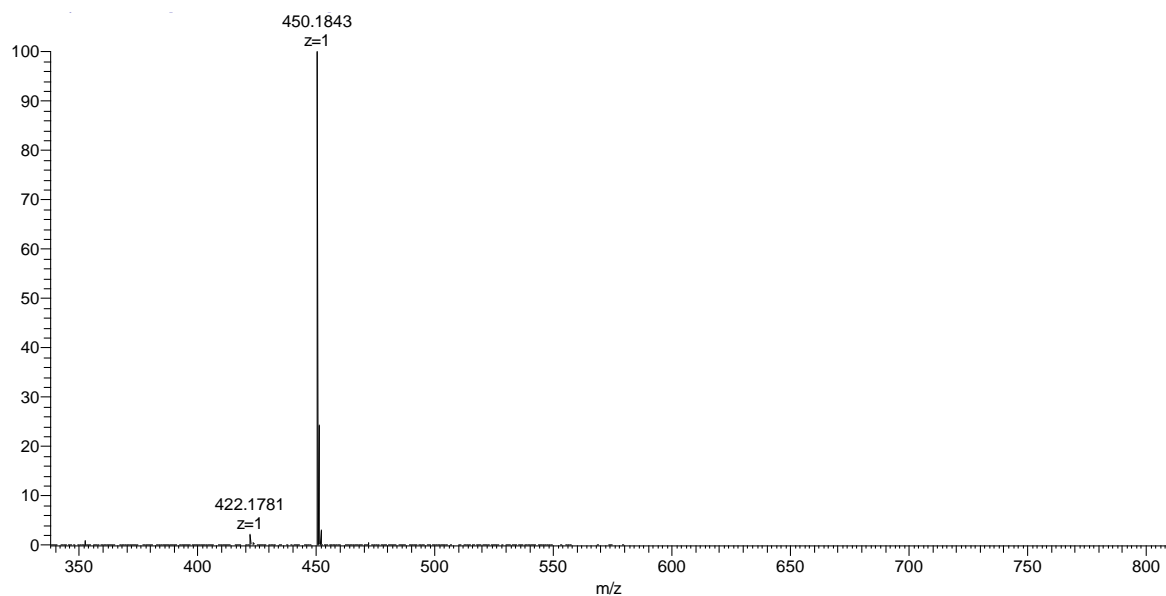

|            |                                                                                                            |
|------------|------------------------------------------------------------------------------------------------------------|
| <b>7cf</b> | $m/z$ calc for $[C_{23}H_{22}F_2IN_4O]^+$ : 535.0801<br>$[M+H]^+$ ; found: 535.0790; mass error: 2.04 ppm. |
|------------|------------------------------------------------------------------------------------------------------------|

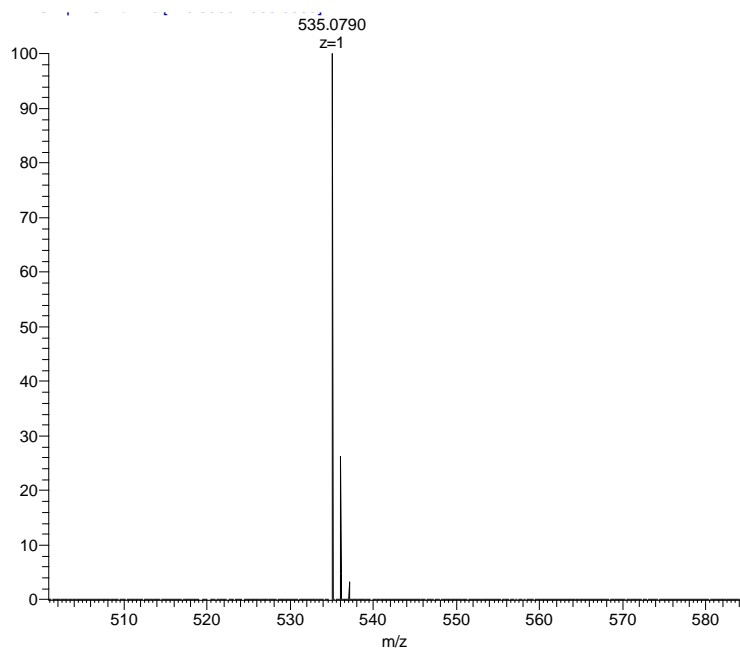

|     |                                                                                                         |
|-----|---------------------------------------------------------------------------------------------------------|
| 7df | $m/z$ calc for $[C_{24}H_{23}IN_5O]^+$ : 524.0942<br>$[M+H]^+$ ; found: 524.0934; mass error: 1.50 ppm. |
|-----|---------------------------------------------------------------------------------------------------------|

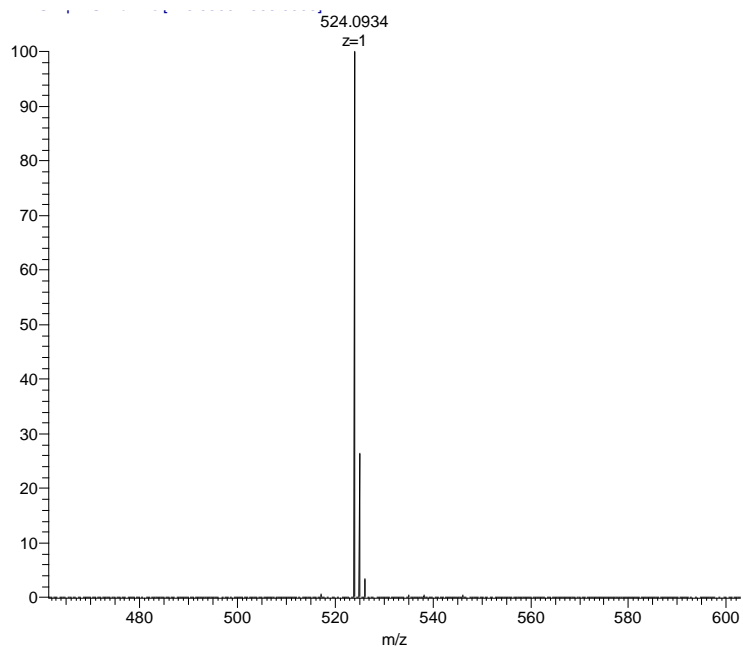

|     |                                                                                                         |
|-----|---------------------------------------------------------------------------------------------------------|
| 7hf | $m/z$ calc for $[C_{23}H_{23}IN_7O]^+$ : 540.1003<br>$[M+H]^+$ ; found: 540.0994; mass error: 1.73 ppm. |
|-----|---------------------------------------------------------------------------------------------------------|

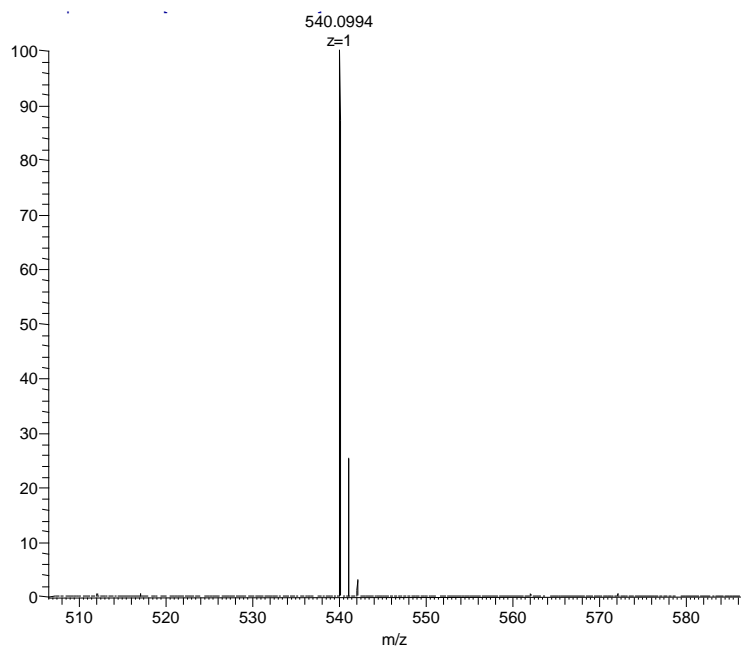

**7hg**

$m/z$  calc for  $[C_{24}H_{26}N_7O]^+$ : 428.2193

$[M+H]^+$ ; found: 428.2185; mass error: 1.95 ppm.

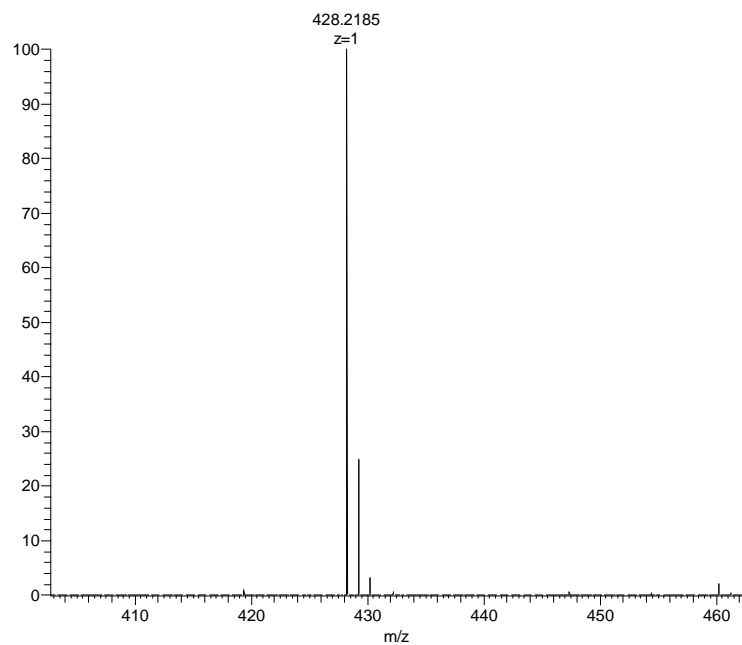



## S.5. MTT Cell Viability Assay Data

### Panc-1

| Cell viability (% of control) |      |      |      |       |       |       |       |       |       |
|-------------------------------|------|------|------|-------|-------|-------|-------|-------|-------|
| Conc. / $\mu\text{M}$         | 50,0 | 30,0 | 18,0 | 10,8  | 6,5   | 3,9   | 2,3   | 1,4   | 0,8   |
| 10a                           | 3,9  | 43,2 | 49,5 | 85,5  | 87,0  | 114,2 | 109,6 | 91,5  | 97,6  |
|                               | 4,6  | 42,4 | 58,6 | 79,9  | 88,8  | 99,6  | 106,2 | 114,8 | 107,5 |
|                               | 1,2  | 12,6 | 21,7 | 35,1  | 57,4  | 120,3 | 124,5 | 108,7 | 108,7 |
|                               | 1,5  | 16,8 | 34,4 | 46,0  | 75,2  | 127,5 | 132,0 | 130,0 | 133,1 |
| 17b                           | 0,8  | 0,9  | 96,5 | 137,9 | 97,7  | 119,6 | 112,1 | 104,7 | 108,5 |
|                               | 0,6  | 0,7  | 60,6 | 114,9 | 109,7 | 101,4 | 105,3 | 112,3 | 111,0 |
|                               | 0,6  | 0,6  | 15,2 | 147,5 | 153,8 | 151,3 | 129,6 | 116,6 | 111,2 |
|                               | 0,2  | 0,4  | 30,7 | 149,1 | 146,2 | 139,3 | 143,2 | 120,8 | 113,9 |
| 17c                           | 0,9  | 0,8  | 1,0  | 16,2  | 88,9  | 112,6 | 114,3 | 108,5 | 124,9 |
|                               | 0,8  | 0,7  | 1,0  | 13,4  | 87,0  | 106,1 | 107,5 | 125,1 | 122,1 |
|                               | 0,6  | 0,6  | 0,4  | 2,4   | 96,4  | 130,8 | 145,4 | 117,9 | 118,7 |
|                               | 0,6  | 0,6  | 0,4  | 4,5   | 48,4  | 146,2 | 146,9 | 149,3 | 148,4 |
| 17d                           | 0,6  | 1,0  | 1,1  | 96,8  | 118,5 | 113,1 | 113,5 | 110,7 | 120,7 |
|                               | 0,7  | 0,8  | 1,0  | 79,6  | 105,1 | 103,9 | 108,6 | 120,4 | 113,3 |
|                               | 0,6  | 0,4  | 0,3  | 1,2   | 153,5 | 147,7 | 128,3 | 120,3 | 128,4 |
|                               | 0,2  | 0,4  | 0,4  | 0,7   | 104,1 | 159,6 | 125,5 | 139,6 | 123,4 |
| ONC201                        | 42,2 | 66,4 | 65,9 | 64,9  | 51,3  | 64,1  | 68,2  | 102,1 | 95,4  |
|                               | 46,6 | 71,0 | 72,1 | 63,6  | 58,9  | 62,8  | 71,7  | 81,3  | 94,4  |
|                               | 34,1 | 26,3 | 29,1 | 22,6  | 24,7  | 32,9  | 49,2  | 56,2  | 93,0  |
|                               | 26,1 | 26,3 | 33,1 | 26,6  | 30,9  | 42,8  | 40,0  | 67,0  | 116,7 |
|                               | 26,6 | 28,0 | 31,0 | 27,5  | 29,8  | 37,2  | 46,9  | 59,3  | 87,5  |
|                               | 27,9 | 29,5 | 23,5 | 29,5  | 26,4  | 31,4  | 46,5  | 58,1  | 89,9  |

## A2058

|                       |      | Cell viability (% of control) |      |      |      |       |       |       |       |
|-----------------------|------|-------------------------------|------|------|------|-------|-------|-------|-------|
| Conc. / $\mu\text{M}$ | 50,0 | 30,0                          | 18,0 | 10,8 | 6,5  | 3,9   | 2,3   | 1,4   | 0,8   |
| 10a                   | 30,0 | 42,5                          | 55,0 | 57,5 | 76,7 | 115,8 | 120,8 | 103,3 | 99,2  |
|                       | 25,6 | 37,0                          | 49,3 | 53,7 | 76,7 | 116,3 | 116,3 | 110,1 | 96,0  |
|                       | 33,8 | 35,4                          | 48,8 | 49,1 | 91,6 | 119,7 | 121,7 | 100,9 | 95,3  |
|                       | 23,6 | 37,2                          | 60,9 | 64,1 | 83,8 | 144,3 | 160,0 | 133,9 | 109,9 |
|                       |      |                               |      |      |      |       |       |       |       |
| 17b                   | 2,5  | 4,2                           | 10,0 | 73,3 | 98,3 | 89,2  | 89,2  | 101,7 | 101,7 |
|                       | 3,5  | 4,4                           | 10,6 | 83,7 | 90,7 | 91,6  | 78,4  | 90,7  | 105,7 |
|                       | 1,7  | 1,3                           | 2,0  | 48,8 | 89,6 | 95,6  | 88,6  | 97,3  | 98,9  |
|                       | 1,4  | 1,4                           | 2,1  | 48,7 | 99,5 | 90,9  | 102,0 | 106,0 | 100,6 |
| 17c                   | 6,7  | 3,3                           | 3,3  | 3,3  | 26,7 | 31,7  | 102,5 | 95,8  | 95,0  |
|                       | 7,0  | 4,4                           | 3,5  | 2,6  | 21,1 | 39,6  | 85,5  | 80,2  | 85,5  |
|                       | 2,3  | 1,7                           | 1,0  | 2,0  | 17,7 | 58,8  | 94,9  | 91,2  | 95,9  |
|                       | 3,6  | 2,1                           | 1,8  | 2,5  | 17,5 | 68,4  | 87,4  | 93,8  | 104,2 |
| 17d                   | 2,5  | 4,2                           | 2,5  | 4,2  | 40,0 | 82,5  | 90,8  | 101,7 | 100,0 |
|                       | 3,5  | 4,4                           | 2,6  | 5,3  | 52,0 | 75,8  | 72,2  | 92,5  | 111,9 |
|                       | 0,7  | 1,3                           | 1,0  | 2,3  | 54,1 | 78,5  | 111,0 | 105,9 | 101,6 |
|                       | 1,8  | 1,1                           | 1,4  | 3,6  | 51,2 | 80,9  | 95,2  | 100,6 | 99,5  |
| ONC201                | 40,8 | 41,7                          | 49,2 | 49,2 | 44,2 | 40,0  | 50,8  | 63,3  | 75,0  |
|                       | 42,3 | 47,6                          | 58,1 | 45,8 | 45,8 | 50,2  | 51,1  | 66,1  | 74,0  |
|                       | 39,1 | 48,1                          | 49,1 | 54,5 | 54,1 | 57,5  | 54,5  | 84,6  | 97,3  |
|                       | 37,2 | 45,5                          | 48,7 | 53,3 | 50,5 | 51,6  | 61,2  | 75,2  | 88,4  |

## EBC-1

|                       |      | Cell viability (% of control) |      |      |       |       |       |       |       |
|-----------------------|------|-------------------------------|------|------|-------|-------|-------|-------|-------|
| Conc. / $\mu\text{M}$ | 50,0 | 30,0                          | 18,0 | 10,8 | 6,5   | 3,9   | 2,3   | 1,4   | 0,8   |
| 10a                   | 1,4  | 2,5                           | 18,0 | 27,4 | 48,7  | 84,4  | 92,0  | 96,7  | 95,6  |
|                       | 2,7  | 2,7                           | 18,4 | 30,6 | 52,5  | 98,8  | 106,1 | 90,0  | 96,5  |
|                       | 1,6  | 1,9                           | 21,0 | 34,0 | 61,8  | 79,8  | 100,8 | 127,2 | 109,2 |
|                       | 1,0  | 1,8                           | 17,7 | 32,5 | 53,6  | 83,0  | 103,0 | 93,0  | 95,1  |
| 17b                   | 1,4  | 1,8                           | 22,7 | 71,5 | 93,1  | 107,9 | 97,4  | 98,2  | 97,4  |
|                       | 1,9  | 2,7                           | 23,7 | 72,4 | 84,3  | 99,2  | 96,9  | 96,5  | 96,1  |
|                       | 1,4  | 1,4                           | 11,4 | 54,5 | 106,5 | 106,2 | 102,7 | 108,9 | 101,3 |
|                       | 1,0  | 1,0                           | 11,5 | 45,1 | 100,5 | 103,5 | 106,4 | 97,9  | 106,4 |
| 17c                   | 1,1  | 2,2                           | 1,8  | 6,1  | 37,9  | 80,8  | 76,5  | 98,9  | 93,5  |
|                       | 1,9  | 2,3                           | 2,3  | 6,1  | 39,1  | 86,6  | 81,2  | 85,4  | 91,5  |
|                       | 1,4  | 1,4                           | 1,1  | 9,3  | 51,2  | 86,3  | 97,8  | 99,7  | 99,9  |
|                       | 1,3  | 1,3                           | 1,5  | 10,0 | 50,2  | 100,2 | 87,4  | 108,7 | 121,2 |
| 17d                   | 2,5  | 1,4                           | 14,1 | 75,1 | 101,8 | 96,0  | 96,4  | 94,2  | 91,7  |
|                       | 3,1  | 3,1                           | 15,3 | 83,9 | 103,0 | 97,7  | 94,2  | 87,7  | 90,0  |
|                       | 1,1  | 1,6                           | 7,1  | 66,4 | 115,7 | 117,6 | 112,2 | 107,3 | 98,3  |
|                       | 0,8  | 1,3                           | 12,8 | 68,7 | 98,4  | 101,5 | 101,5 | 114,3 | 112,8 |
| ONC201                | 18,8 | 25,6                          | 25,3 | 26,7 | 28,9  | 28,5  | 35,4  | 60,3  | 71,5  |
|                       | 13,4 | 23,4                          | 23,4 | 26,0 | 23,0  | 26,0  | 35,2  | 52,9  | 60,9  |
|                       | 15,5 | 23,1                          | 29,7 | 30,2 | 40,8  | 37,3  | 50,7  | 70,0  | 87,1  |
|                       | 21,0 | 27,2                          | 34,3 | 27,4 | 30,2  | 42,5  | 56,1  | 72,0  | 99,9  |

## Fadu

| Cell viability (% of control) |      |      |      |      |       |       |       |       |       |
|-------------------------------|------|------|------|------|-------|-------|-------|-------|-------|
| Conc. / $\mu$ M               | 50,0 | 30,0 | 18,0 | 10,8 | 6,5   | 3,9   | 2,3   | 1,4   | 0,8   |
| 10a                           | 5,6  | 6,5  | 11,5 | 16,5 | 35,5  | 67,9  | 81,3  | 96,1  | 81,3  |
|                               | 4,0  | 5,0  | 12,9 | 20,3 | 42,1  | 86,0  | 103,3 | 113,0 | 89,2  |
|                               | 8,7  | 8,0  | 13,0 | 20,0 | 33,4  | 94,2  | 107,3 | 105,2 | 108,6 |
|                               | 6,0  | 8,3  | 10,7 | 22,6 | 34,8  | 81,4  | 107,9 | 91,3  | 97,7  |
| 17b                           | 1,3  | 1,3  | 28,2 | 69,0 | 82,7  | 70,8  | 91,7  | 73,3  | 100,1 |
|                               | 1,0  | 1,0  | 25,2 | 91,3 | 98,5  | 108,6 | 97,1  | 115,8 | 92,5  |
|                               | 0,4  | 0,7  | 16,6 | 79,3 | 84,2  | 100,3 | 107,8 | 99,1  | 101,3 |
|                               | 1,1  | 1,5  | 23,4 | 84,5 | 93,4  | 90,1  | 91,8  | 105,0 | 103,3 |
| 17c                           | 1,3  | 1,3  | 0,8  | 1,5  | 37,0  | 88,0  | 72,3  | 90,1  | 108,4 |
|                               | 1,2  | 1,0  | 1,4  | 1,2  | 44,3  | 94,5  | 108,2 | 110,8 | 91,7  |
|                               | 1,0  | 0,7  | 0,7  | 1,3  | 46,5  | 105,7 | 96,3  | 105,7 | 105,9 |
|                               | 1,6  | 1,2  | 1,2  | 2,4  | 62,1  | 92,0  | 98,9  | 103,7 | 98,5  |
| 17d                           | 0,8  | 1,5  | 1,3  | 34,3 | 79,0  | 77,5  | 98,4  | 85,7  | 122,2 |
|                               | 1,2  | 1,2  | 1,2  | 58,0 | 102,5 | 100,5 | 104,4 | 112,4 | 102,1 |
|                               | 0,6  | 0,9  | 0,6  | 37,2 | 90,5  | 108,7 | 97,7  | 94,9  | 94,2  |
|                               | 1,1  | 1,5  | 1,3  | 44,2 | 97,1  | 97,6  | 103,6 | 100,1 | 105,2 |
| ONC201                        | 9,2  | 9,6  | 9,2  | 10,4 | 13,6  | 18,2  | 23,4  | 43,7  | 68,1  |
|                               | 9,7  | 12,7 | 9,7  | 13,5 | 14,7  | 16,9  | 25,8  | 60,4  | 81,4  |
|                               | 15,1 | 17,2 | 19,1 | 20,0 | 22,3  | 22,9  | 33,4  | 70,3  | 86,6  |
|                               | 12,9 | 18,5 | 19,7 | 18,9 | 25,0  | 21,2  | 36,3  | 67,7  | 97,1  |

## S.6. CellTiter-Glo Cell Viability Assay Data

17c

| Cell viability (% of control) |      |      |       |       |       |       |       |       |
|-------------------------------|------|------|-------|-------|-------|-------|-------|-------|
| Conc. / $\mu$ M               | 30,0 | 18,0 | 10,8  | 6,5   | 3,9   | 2,3   | 1,4   | 0,8   |
| PANC-1                        | 0,0  | 0,1  | 0,1   | 7,6   | 67,4  | 95,5  | 93,0  | 89,1  |
|                               | 0,0  | 0,0  | 0,0   | 9,1   | 69,3  | 97,9  | 94,2  | 95,0  |
|                               | 0,0  | 0,0  | 0,0   | 7,8   | 71,5  | 97,6  | 91,5  | 94,4  |
| A2058                         | 0,1  | 0,1  | 0,6   | 2,8   | 38,8  | 85,4  | 117,9 | 97,9  |
|                               | 0,0  | 0,0  | 0,6   | 2,1   | 45,9  | 84,8  | 122,9 | 99,4  |
|                               | 0,0  | 0,1  | 0,5   | 2,3   | 47,9  | 90,9  | 95,9  | 97,5  |
| EBC-1                         | 0,1  | 0,1  | 0,6   | 2,9   | 39,7  | 87,2  | 116,8 | 96,8  |
|                               | 0,0  | 0,0  | 0,6   | 2,2   | 46,1  | 85,2  | 120,4 | 99,0  |
|                               | 0,0  | 0,1  | 0,5   | 2,3   | 49,3  | 92,7  | 98,6  | 98,5  |
| Fadu                          | 0,1  | 0,1  | 0,1   | 65,6  | 100,0 | 103,1 | 105,0 | 103,2 |
|                               | 0,0  | 0,0  | 0,0   | 67,2  | 99,7  | 102,6 | 96,4  | 100,9 |
|                               | 0,0  | 0,0  | 0,1   | 62,5  | 97,5  | 95,9  | 102,7 | 98,6  |
| P.fibroblast                  | 0,1  | 0,1  | 100,9 | 125,2 | 104,5 | 105,5 | 108,4 | 97,3  |
|                               | 0,0  | 0,1  | 101,5 | 127,3 | 104,6 | 104,0 | 103,0 | 104,6 |
|                               | 0,0  | 0,1  | 103,3 | 128,1 | 106,3 | 102,7 | 103,8 | 101,4 |

17d

| Cell viability (% of control) |      |      |       |       |       |       |       |       |
|-------------------------------|------|------|-------|-------|-------|-------|-------|-------|
| Conc. / $\mu$ M               | 30,0 | 18,0 | 10,8  | 6,5   | 3,9   | 2,3   | 1,4   | 0,8   |
| PANC-1                        | 0,0  | 0,0  | 0,0   | 4,9   | 94,3  | 97,6  | 101,9 | 99,8  |
|                               | 0,0  | 0,0  | 0,0   | 4,0   | 96,1  | 98,7  | 100,1 | 103,5 |
|                               | 0,1  | 0,1  | 0,1   | 2,7   | 93,9  | 102,7 | 101,5 | 99,1  |
| A2058                         | 0,0  | 0,0  | 0,4   | 18,6  | 93,3  | 103,4 | 103,0 | 98,7  |
|                               | 0,0  | 0,0  | 0,4   | 23,8  | 90,8  | 102,3 | 99,8  | 98,3  |
|                               | 0,1  | 0,1  | 0,5   | 26,9  | 92,3  | 110,0 | 102,7 | 101,3 |
| EBC-1                         | 0,0  | 0,0  | 0,4   | 19,1  | 92,5  | 102,3 | 101,7 | 99,8  |
|                               | 0,0  | 0,0  | 0,4   | 23,6  | 90,9  | 103,0 | 99,8  | 98,8  |
|                               | 0,1  | 0,1  | 0,6   | 27,1  | 92,8  | 108,8 | 102,5 | 99,7  |
| Fadu                          | 0,0  | 0,0  | 0,7   | 82,1  | 93,8  | 95,9  | 102,3 | 99,2  |
|                               | 0,0  | 0,0  | 1,2   | 82,0  | 98,4  | 97,1  | 101,8 | 102,8 |
|                               | 0,1  | 0,1  | 3,1   | 81,5  | 94,9  | 91,4  | 102,8 | 96,2  |
| P.fibroblast                  | 0,0  | 0,1  | 102,0 | 107,2 | 102,2 | 105,0 | 100,9 | 102,8 |
|                               | 0,0  | 0,1  | 74,5  | 111,2 | 101,8 | 102,4 | 102,9 | 105,1 |
|                               | 0,1  | 0,1  | 66,0  | 110,4 | 104,3 | 104,2 | 101,8 | 103,6 |
